# Supplementary material
Source: PubMed Central journal article supplement (PMC3156170)
Supplement: 1106085108_sapp.pdf [file 1106085108_sapp.pdf]

## Supporting Information: Inventory for SI Appendix

1. **SI: Materials and Methods**
2. **Figure S1 - S7** Phylogenetic reconstructions of separate nrDNA and cpDNA gene regions for *Coprosma*, *Geniostoma*, *Korthalsella*, *Melicope*, *Metrosideros*, *Peperomia* and *Rytidosperma*.
3. **Figure S8 - S38** Bayesian phylogenetic reconstruction for 32 LHI genera.
4. **Figure S39 and S40** Maximum parsimony reconstructions for *Coprosma* and *Metrosideros*, including multiple individuals of LHI species.
5. **Figure S41** Age-range correlation" graphs for *Coprosma* and *Metrosideros*.
6. **Table S1** Regional sampling.
7. **Table S2 - S31** Genbank accession numbers.
8. **Table S32** Description of biogeographic regions.
9. **Table S33** Molecular dating constraints.
10. **Table S34** Bayesian run parameters.
11. **Table S35** Gene regions included in this study.
12. **Table S36** Primers used for DNA amplification and sequencing.
13. **SI: Supplemental References**

## Supporting Information: Materials and Methods

### DNA extraction, amplification and sequencing

A modified protocol of the Doyle and Doyle (1987) (1) method was used to extract total genomic DNA from 0.3 to 0.5 g of leaf material dried using silica gel or collected from herbarium sheets (2). DNA was purified using QIAquick columns (Qiagen, Crawley, West Sussex, UK) according to the manufacturer's protocol. Polymerase chain reactions were carried out in 20µl reactions using the primers specified in the Table S36. The PCR protocol included an initial 4 minute denaturation (at 94°C) period followed by 28-32 cycles with 1 minute of denaturation (at 94°C), 1 minute of annealing (between 50-58°C depending on the primer combination), and 1 minute of elongation (72°C). PCR products were purified using QIAquick PCR columns (Qiagen) using the manufacturer's protocol. Both forward and reverse strands were sequenced using an Applied Biosystems 3730 capillary DNA automated sequencer (ABI, Warrington, Cheshire, UK) and Big Dye terminator v3.1 chemistry. Reactions were conducted according to the manufacturer's instructions (ABI). Contigs were assembled and edited in Sequencher version 4.9 (GeneCodes, Ann Arbor, Michigan, USA). For cloned sequences (ITS, *Calystegia* and *Myrsine*), Phusion<sup>®</sup> high-fidelity DNA polymerase (Finnzymes, Keilaranta, Finland) was used for PCR amplification according to the manufacturer's instructions. PCR products were cloned into the pGEM-T cloning vector kit (Promega, Mannheim, Germany). PCR and Cycle sequencing was carried out as described above for 20 clones, to detect allelic variants. One sequence for each detected variant was included in the phylogenetic reconstructions.

### Parsimony phylogenetic reconstructions of *Coprosma* and *Metrosideros*

Maximum parsimony phylogenetic reconstructions containing multiple accessions of the LHI endemic *Metrosideros* and *Coprosma* species were performed in with PAUP\* 4.0b10 (14). Heuristic tree searches were conducted with 1000 random taxon addition replicates, tree-bisection-reconnection (TBR) branch swapping, holding 100 trees at each step with multrees on. Insertion or deletion characters (gaps) were coded as a fifth state (15). Clade support was estimated using the bootstrap method (16): 10000 bootstrap replicates, 1 random taxon addition replicate, TBR branch swapping, and holding 10 trees at each step. For *Metrosideros*, *M. boninensis*, *M. collina*, *M. kermadecensis* and *M. exelsa* were used as outgroups. For *Coprosma* only Species with all three genes were included.

### “Age-range correlation” analyses

Maps were drawn as described by Barraclough and Vogler (17) from dot maps and text descriptions from various sources (12, 18-23) (*Biodiversity occurrence data provided by*: Australian National Herbarium (CANB), Bernice Pauahi Bishop Museum, GBIF New Zealand, Missouri Botanical Garden, Royal Botanic Gardens, Kew, National Herbarium of New South Wales, Herbier de l'Université Louis Pasteur, *accessed through GBIF Data Portal, data.gbif.org, 2010-10-10 or Australia's Virtual Herbarium*, [map output], Council of Heads of Australasian Herbaria, viewed 10 October 2010, <http://www.ersa.edu.au/avh/>). We drew maps in ArcGIS V9.2 and scored presence absence in quarter degree squares. *M. collina* is a paraphyletic species, for the various accessions of this species we considered the island of collection as the range for that sample.

### Figure Legends

**Figures S1 - S7** Phylogenetic reconstructions for *Coprosma*, *Geniostoma*, *Korthalsella*, *Melicope*, *Metrosideros*, *Peperomia* and *Rytidosperma* of separate (a) nrDNA and (b) cpDNA. Trees were reconstructed for nuclear and plastid DNA regions using Beast v1.5.2 with parameter settings described in Table S34. Nodes with less than 0.8 posterior probabilities have been collapsed to aid identification of incongruence between trees. All phylograms are undated. Native LHI species are highlighted by red boxes.

**Figures S8 - S38** Bayesian phylogenetic reconstructions of 32 LHI genera, performed using Beast v1.5.2 with parameter settings described in Table S34. Calibration points for dated trees are denoted by a letter (A, B, C etc...) corresponding to the information given in Table S33. Lord Howe Island native species are denoted by red branches. Underlined species are Lord Howe Island endemics. Posterior probabilities (p.p.) for nodes are denoted by stars: \*\*\* p.p.  $\leq$  0.95, \*\* p.p.  $\leq$  0.90, \* p.p.  $\leq$  0.80. 95% Confidence intervals for estimated node ages in millions of years ago (mya) are depicted at species divergences relevant to the current study.

**Figures S39 and S40** Multiple gene, parsimony phylogenetic reconstructions for *Coprosma* (only species with DNA sequences for all three regions) and *Metrosideros* (only species with 5S DNA sequences), including multiple individuals of LHI species. LHI species are highlighted in red. Numbers at nodes denote the bootstrap support values. *Coprosma\_huttoniana\_4* possessed mixed nuclear DNA sequences of *C. huttoniana* and *C. putida*. For these analyses the mixed regions were coded as ambiguities.

**Figure S41** “Age-range correlation” graphs for (a) *Coprosma* and (b) *Metrosideros*.



**a** Coprosma nrDNA Phylogeny

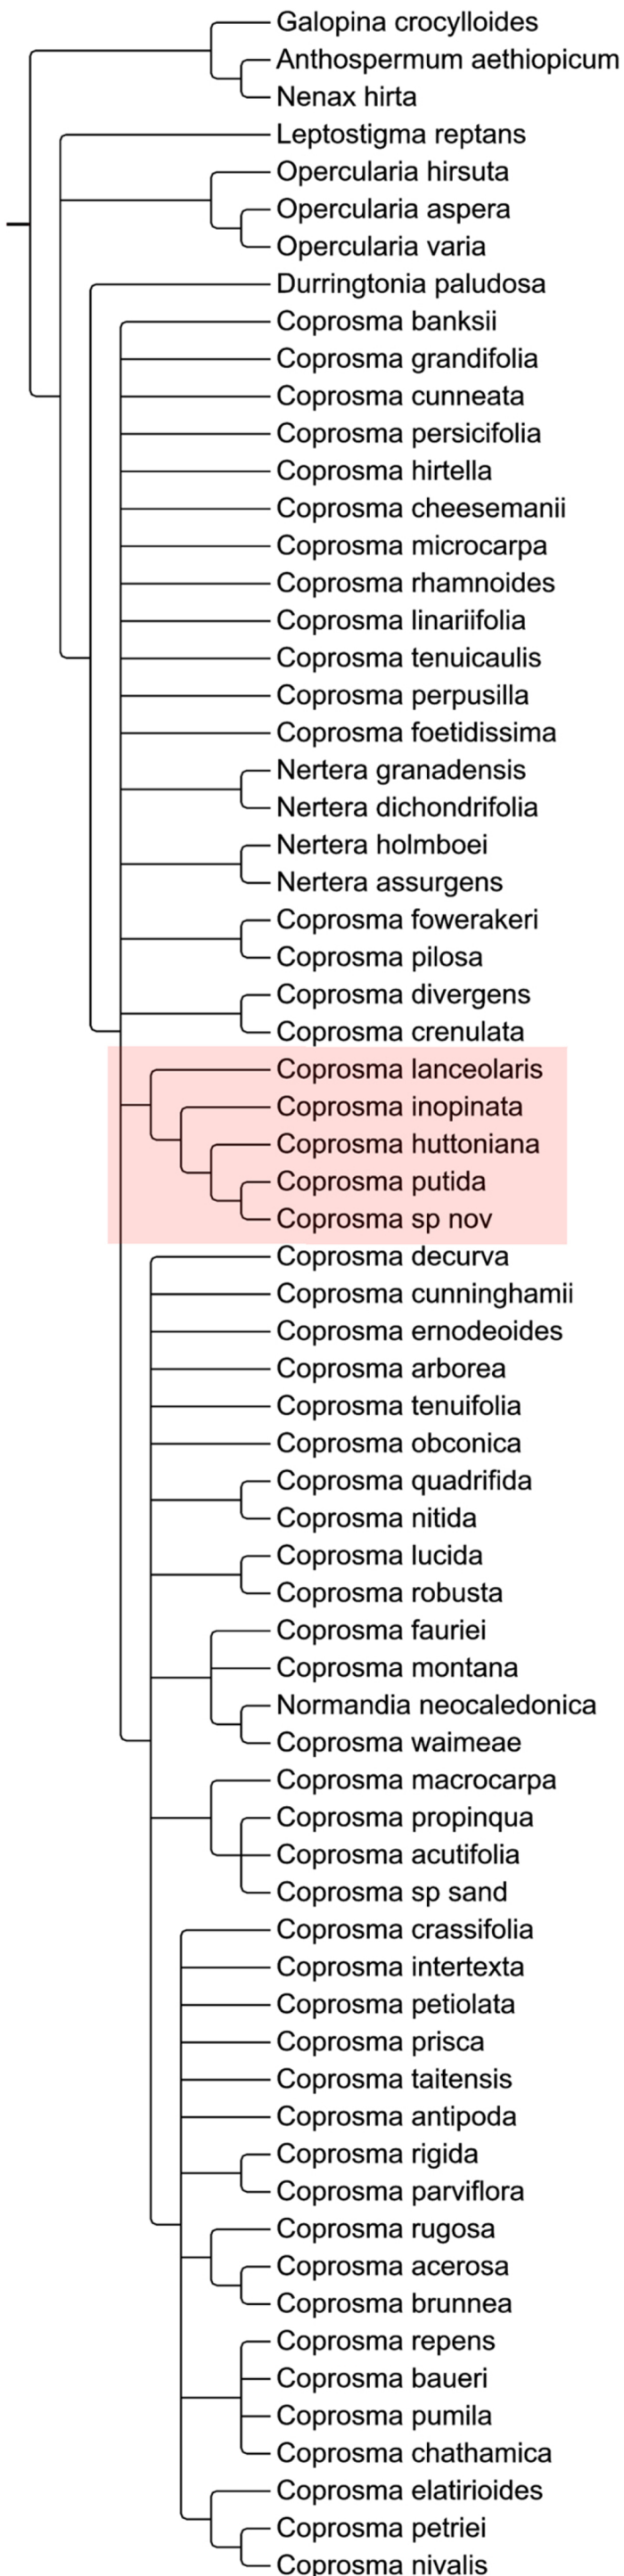

**b** Coprosma cpDNA Phylogeny

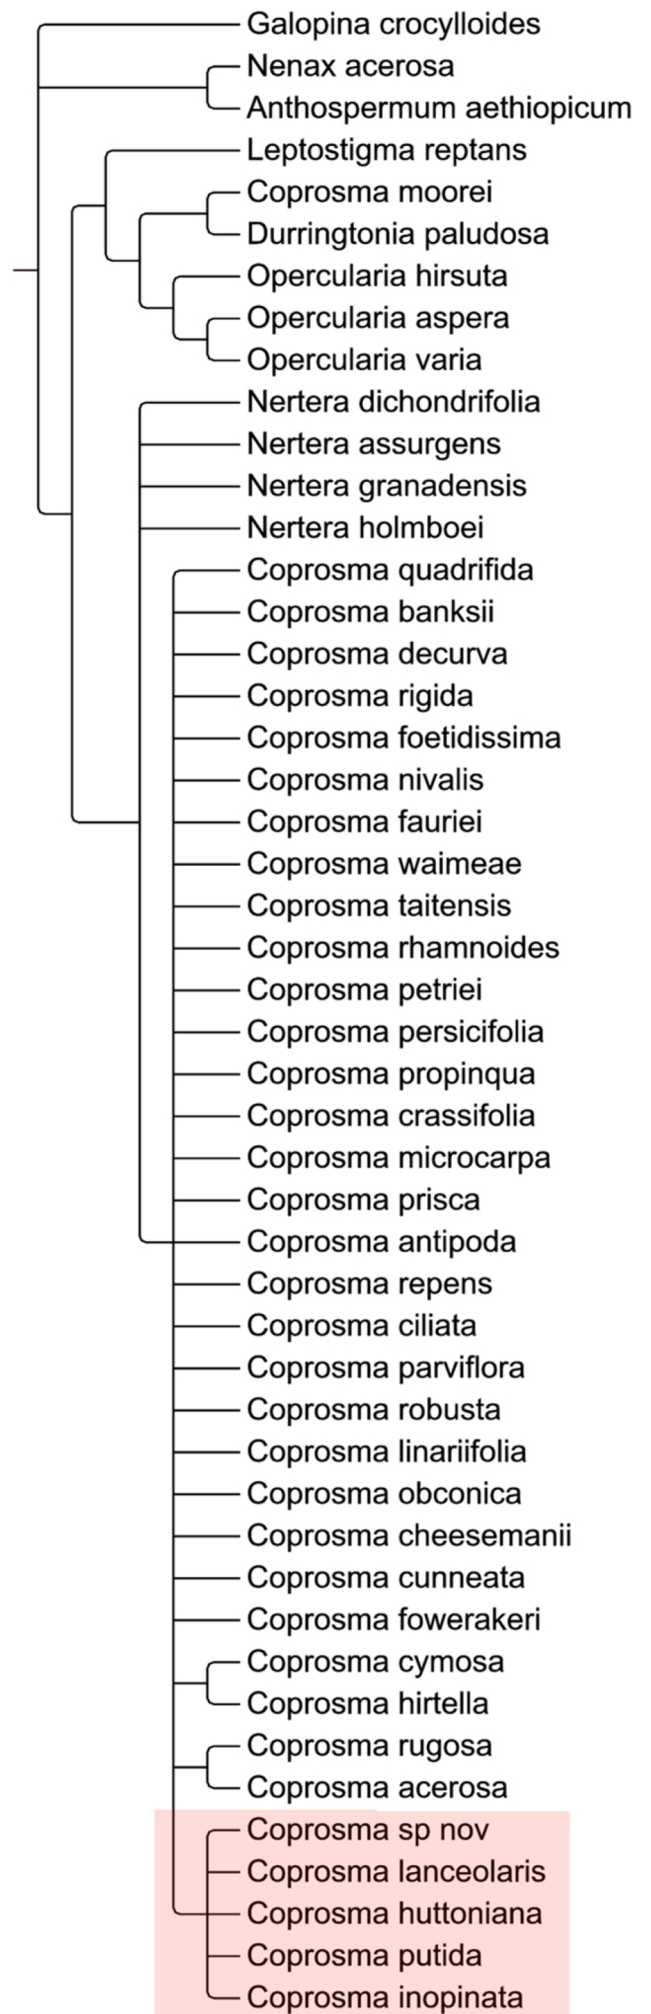

Figure S3. *Coprosma* nrDNA and cpDNA phylogenetic reconstructions

a Geniostoma nrDNA Phylogeny

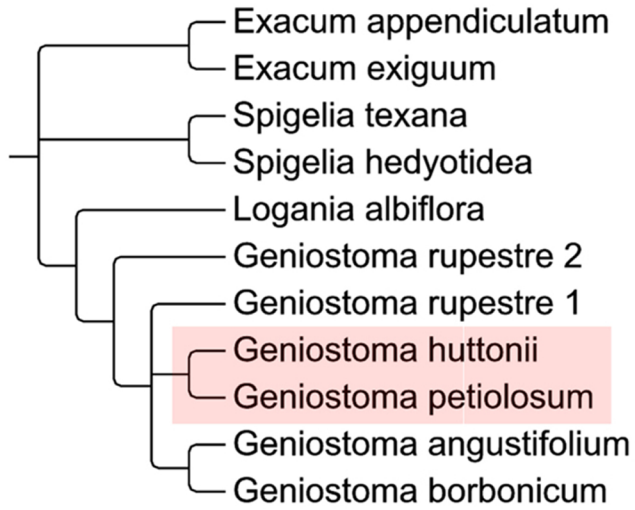

b Geniostoma cpDNA Phylogeny

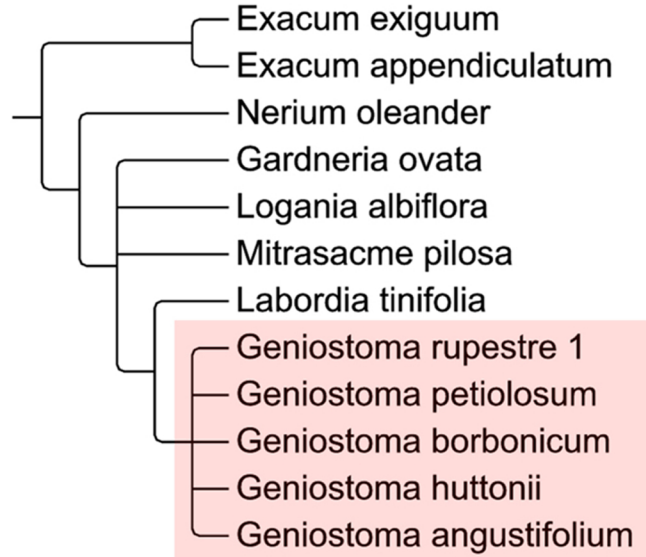

Figure S2. *Geniostoma* nrDNA and cpDNA phylogenetic reconstructions

a Korthalsella nrDNA Phylogeny

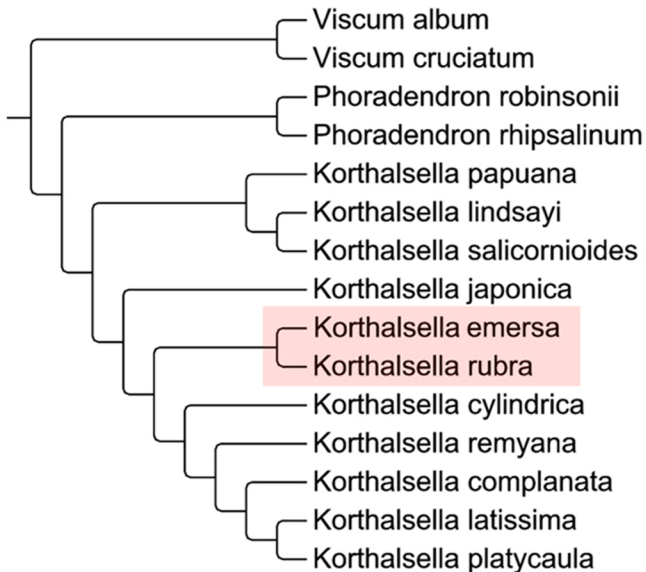

b Korthalsella cpDNA Phylogeny

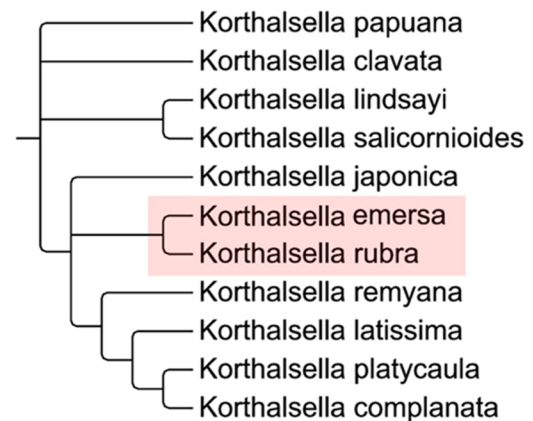

Figure S3. *Korthalsella* nrDNA and cpDNA phylogenetic reconstructions

a Melicope nrDNA Phylogeny

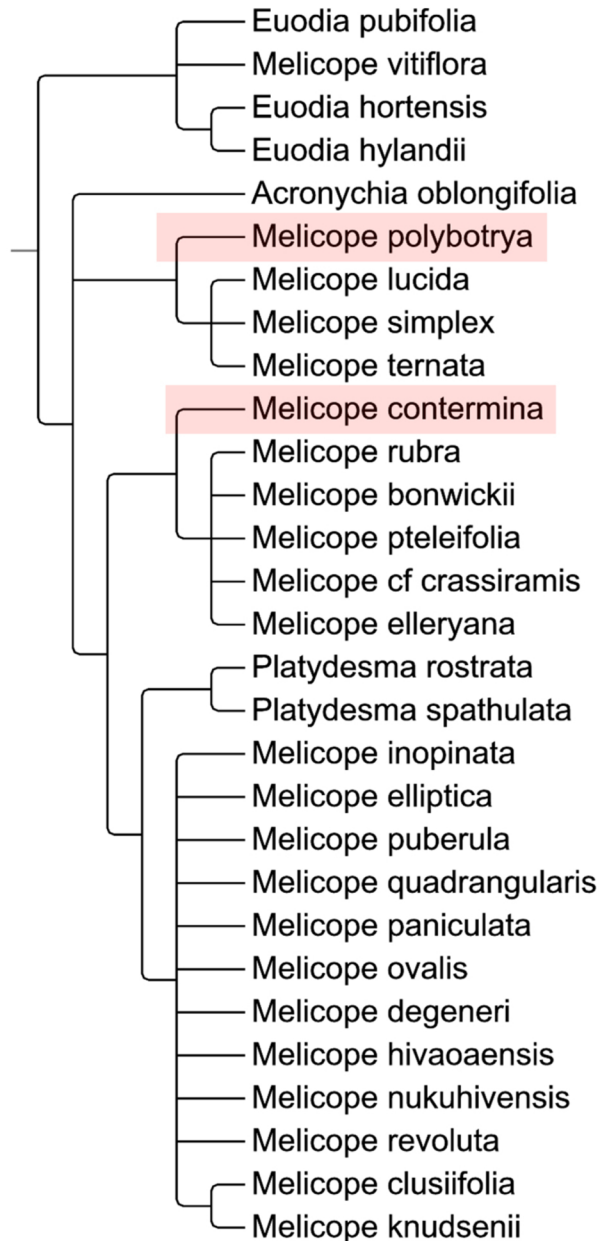

b Melicope cpDNA Phylogeny

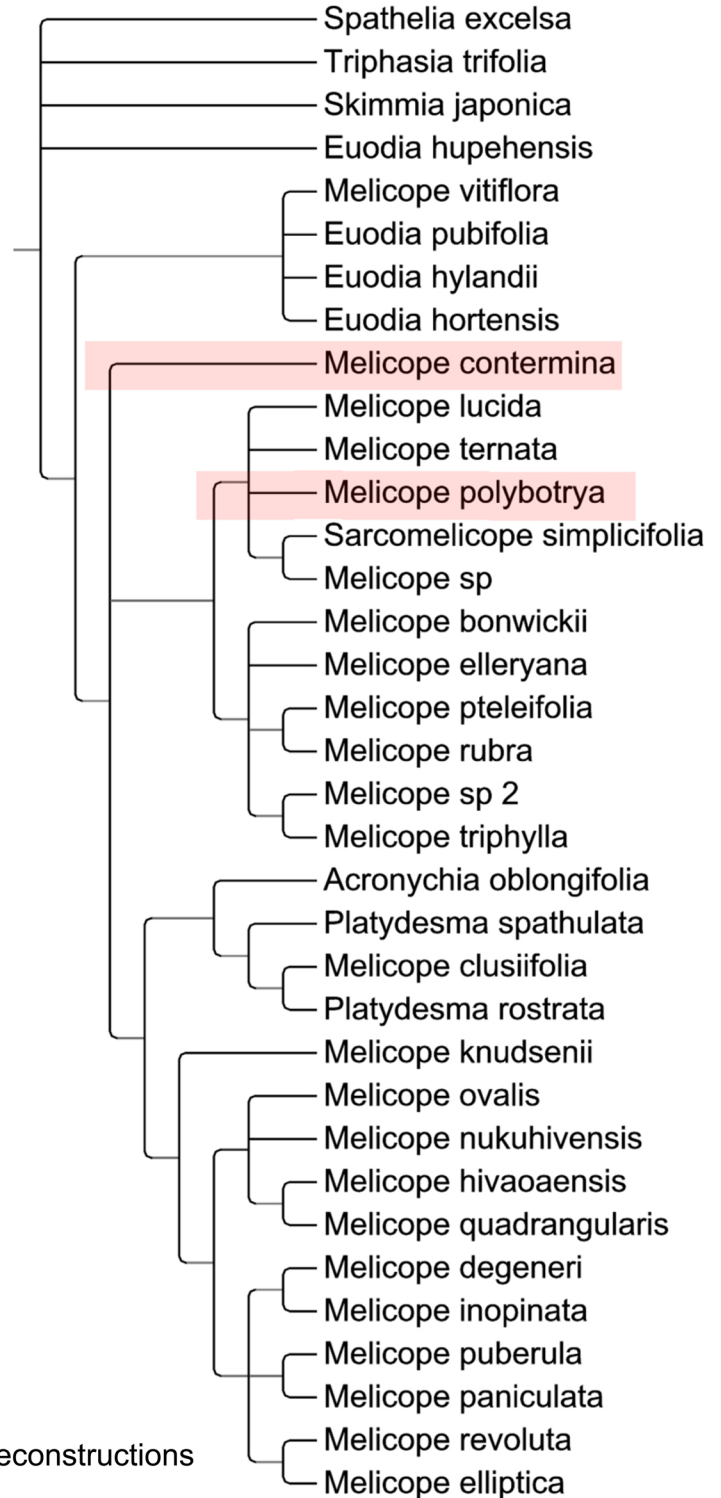

Figure S4. *Melicope* nrDNA and cpDNA phylogenetic reconstructions



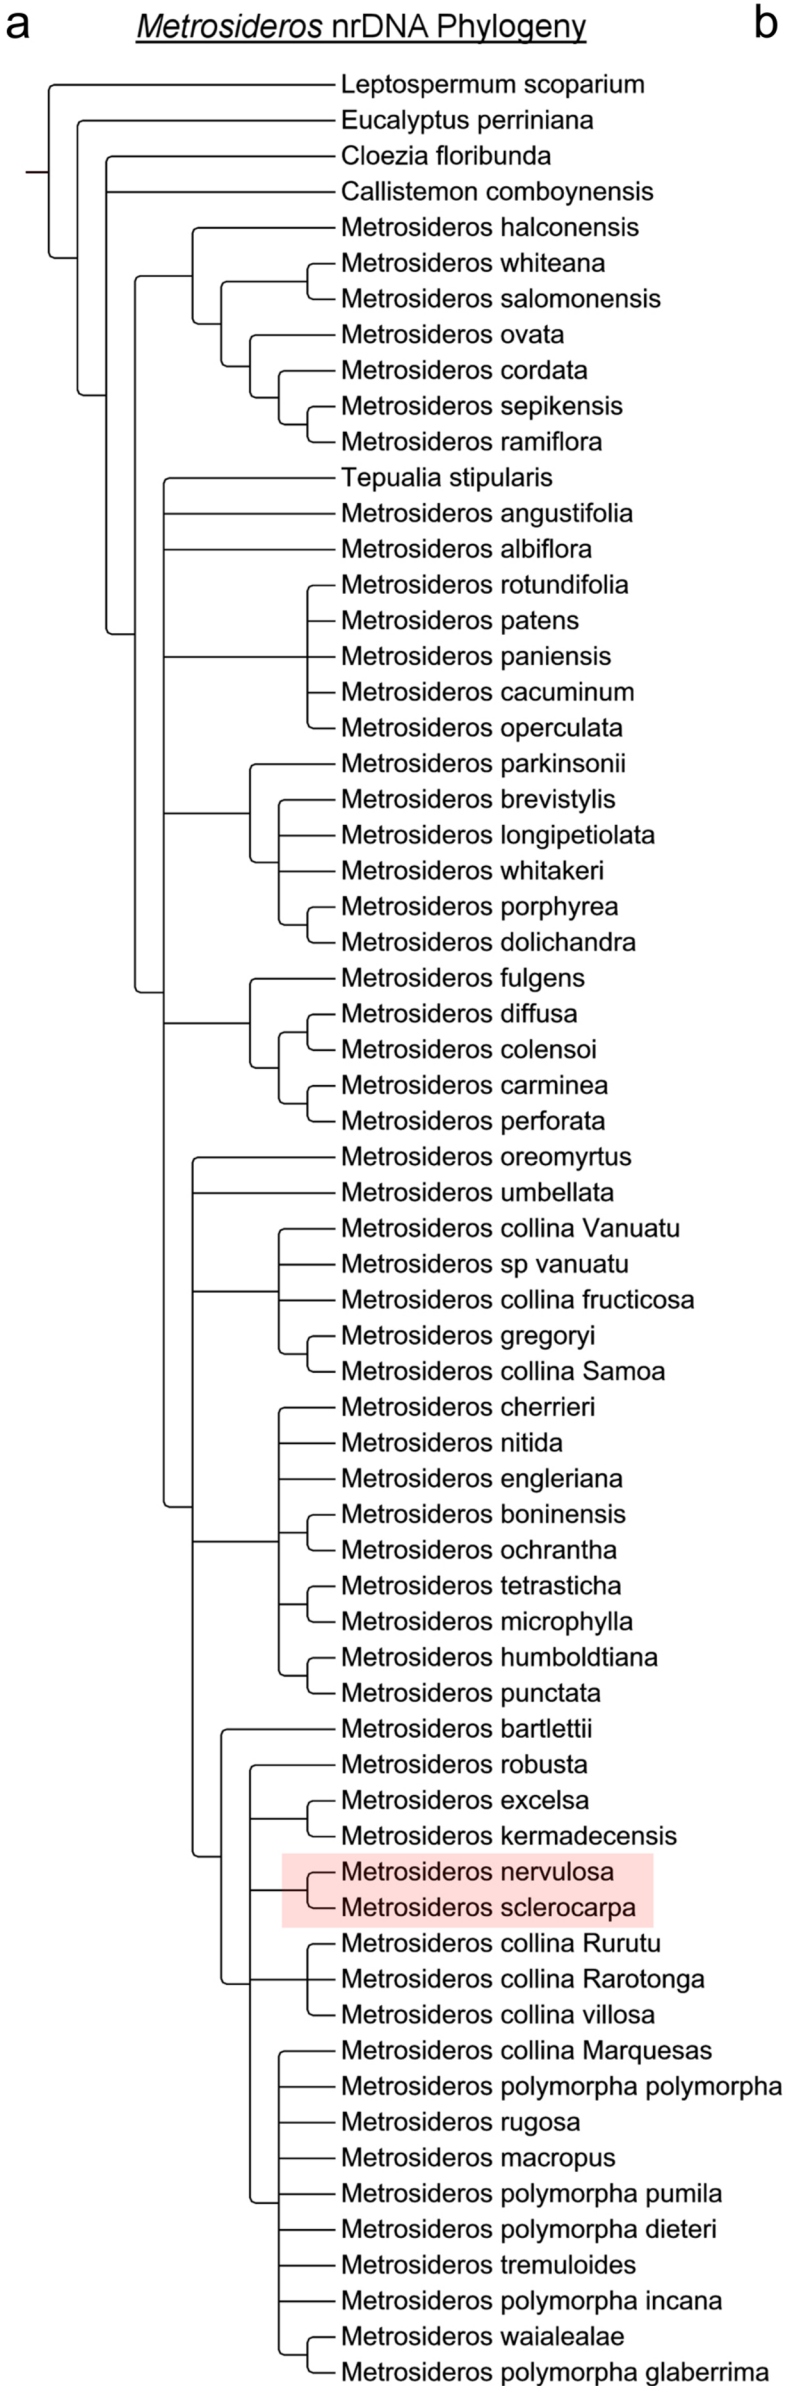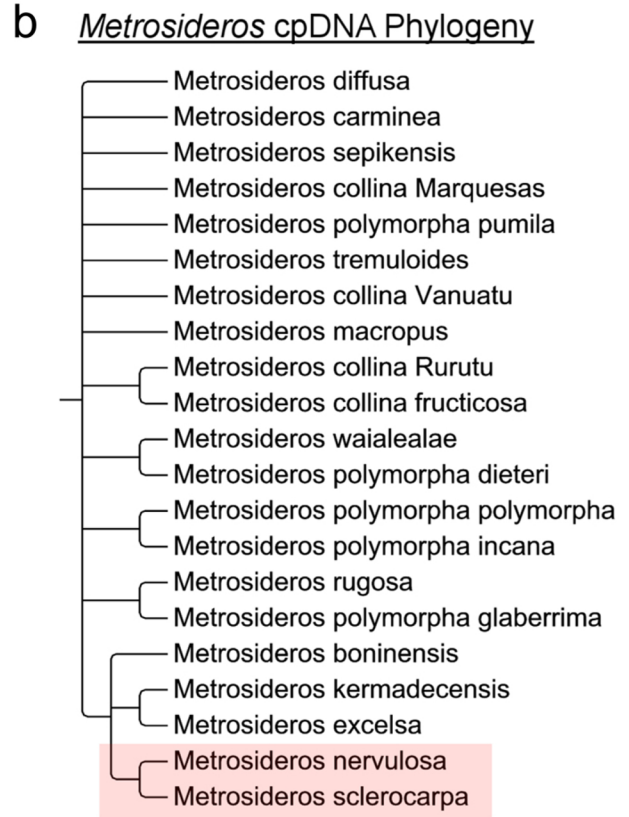

Figure S5. *Metrosideros* nrDNA and cpDNA phylogenetic reconstructions

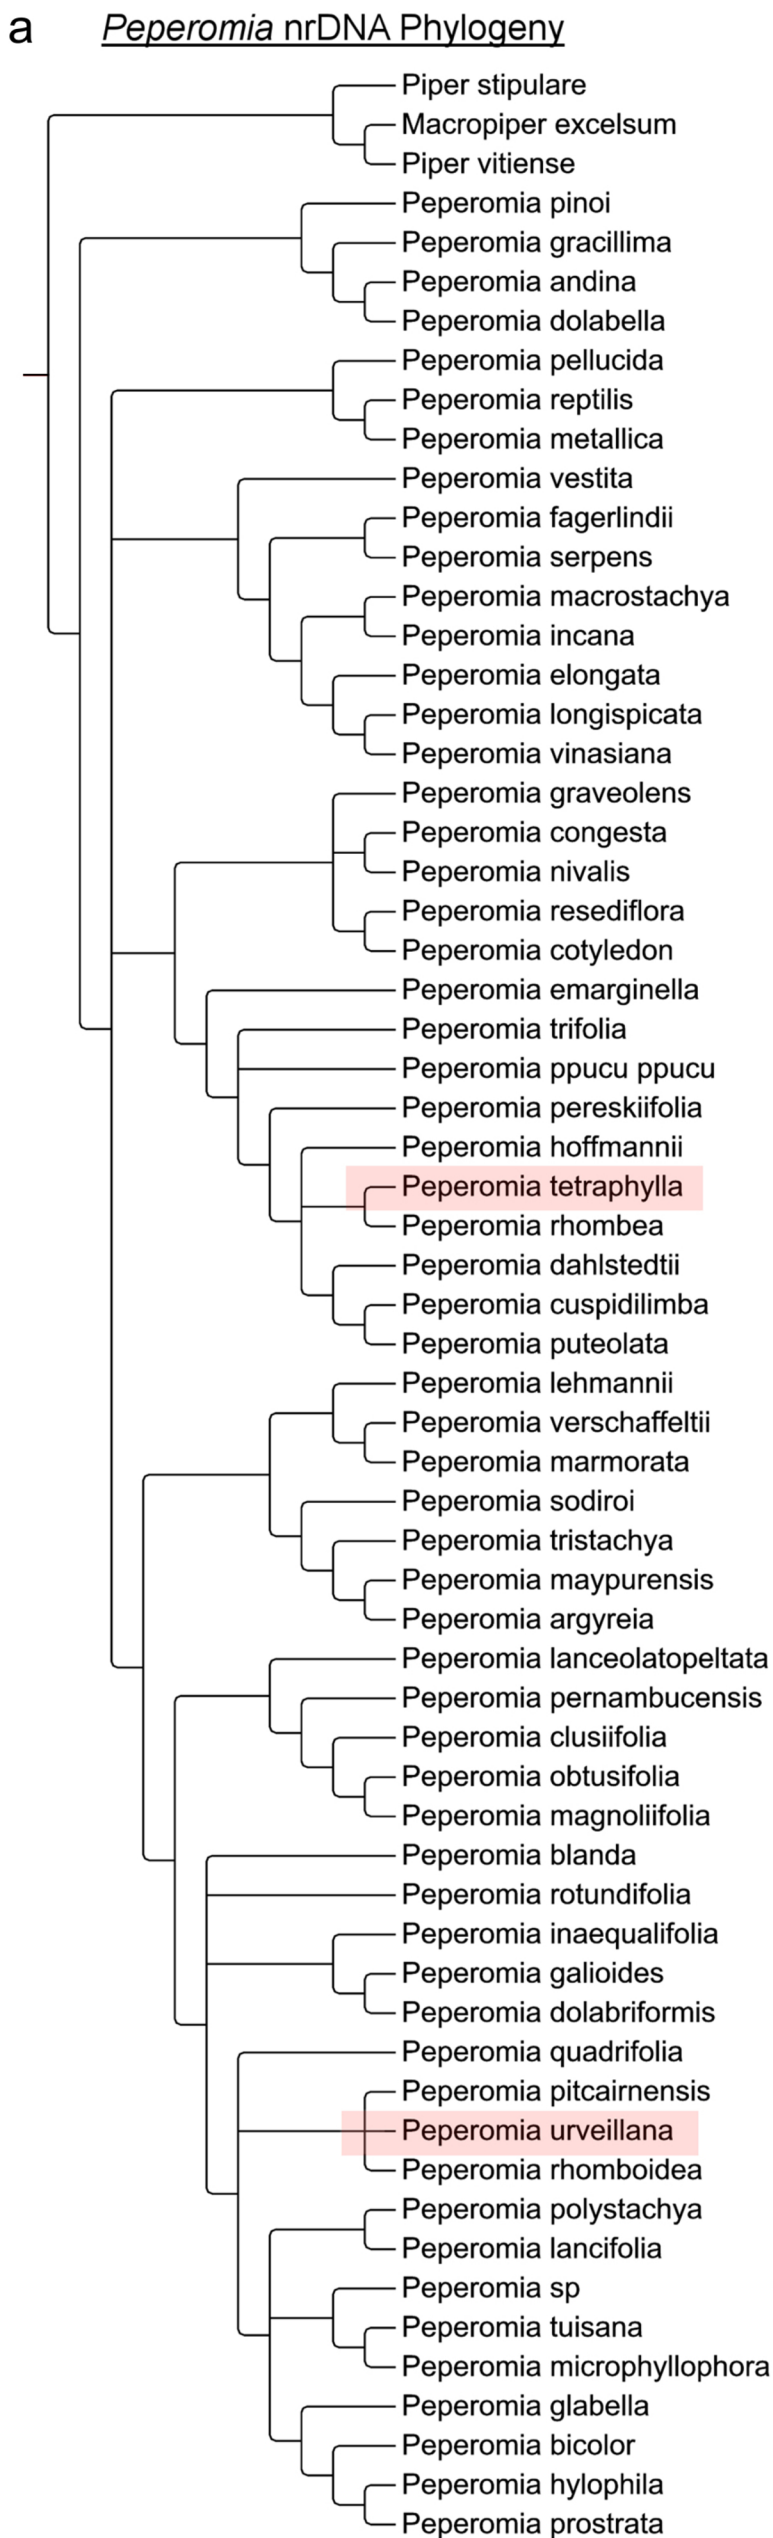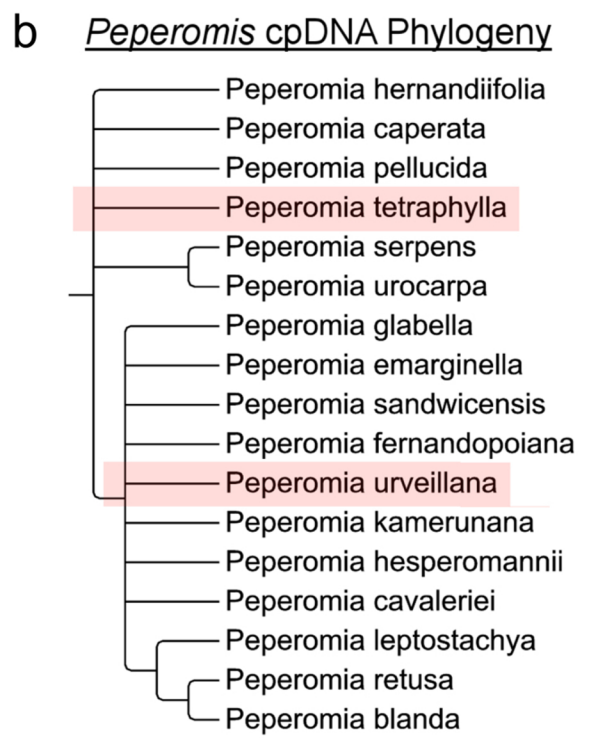

Figure S6. *Peperomia* nrDNA and cpDNA phylogenetic reconstructions

**a** *Rytidosperma* nrDNA Phylogeny

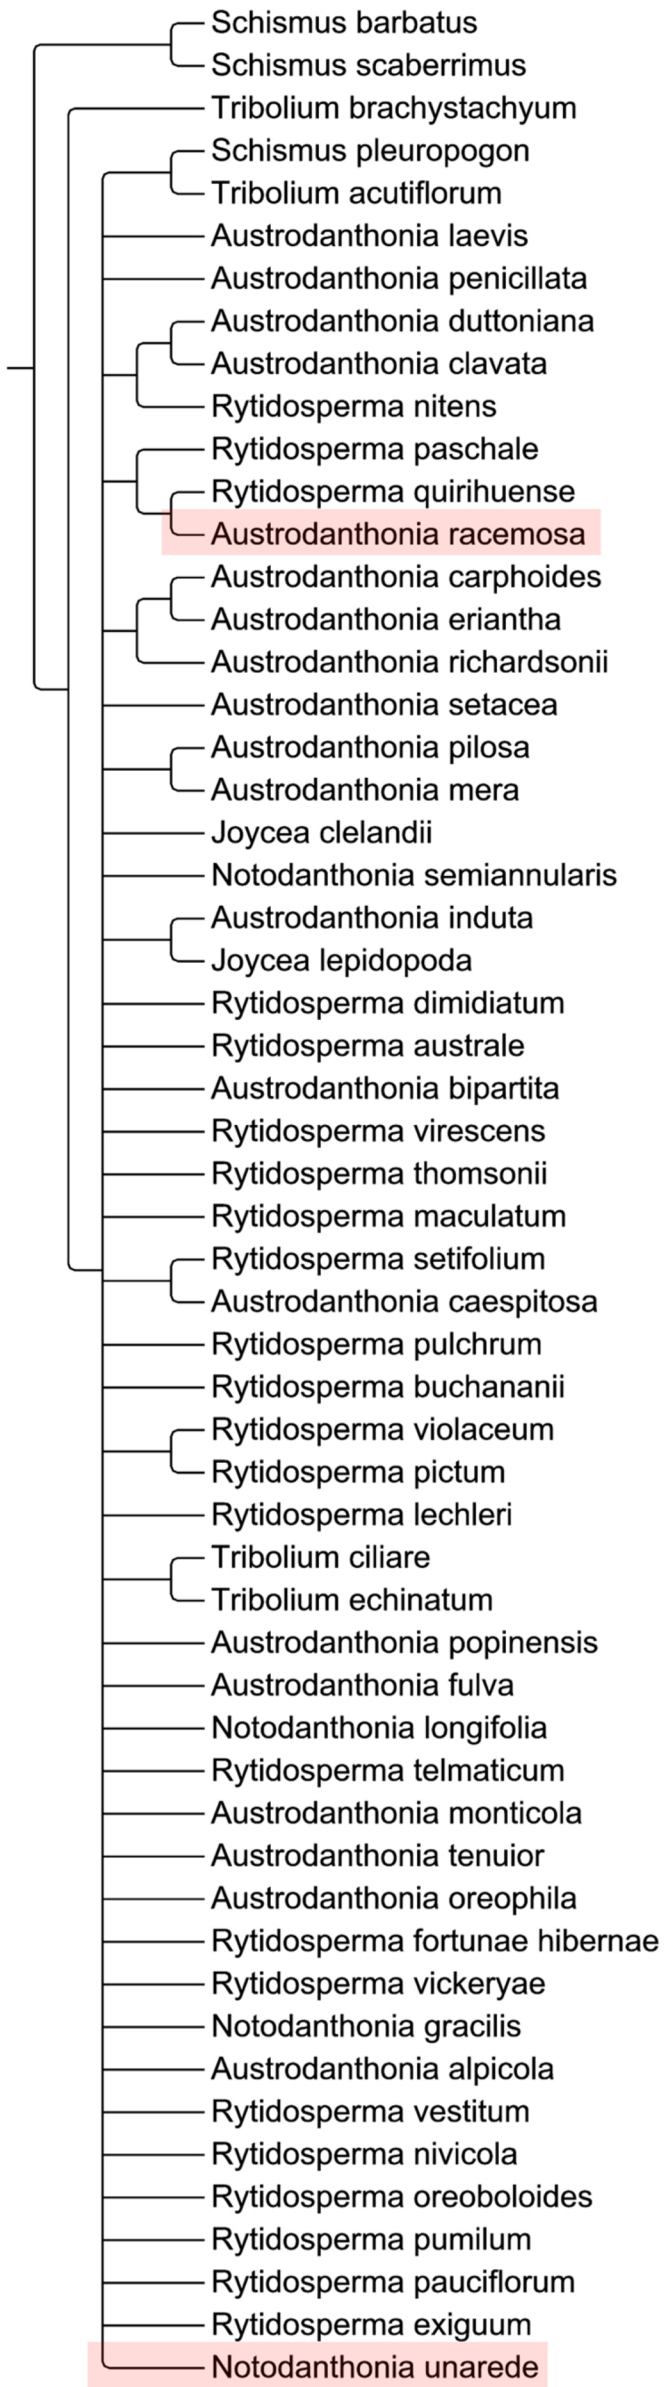

**b** *Rytidosperma* cpDNA Phylogeny

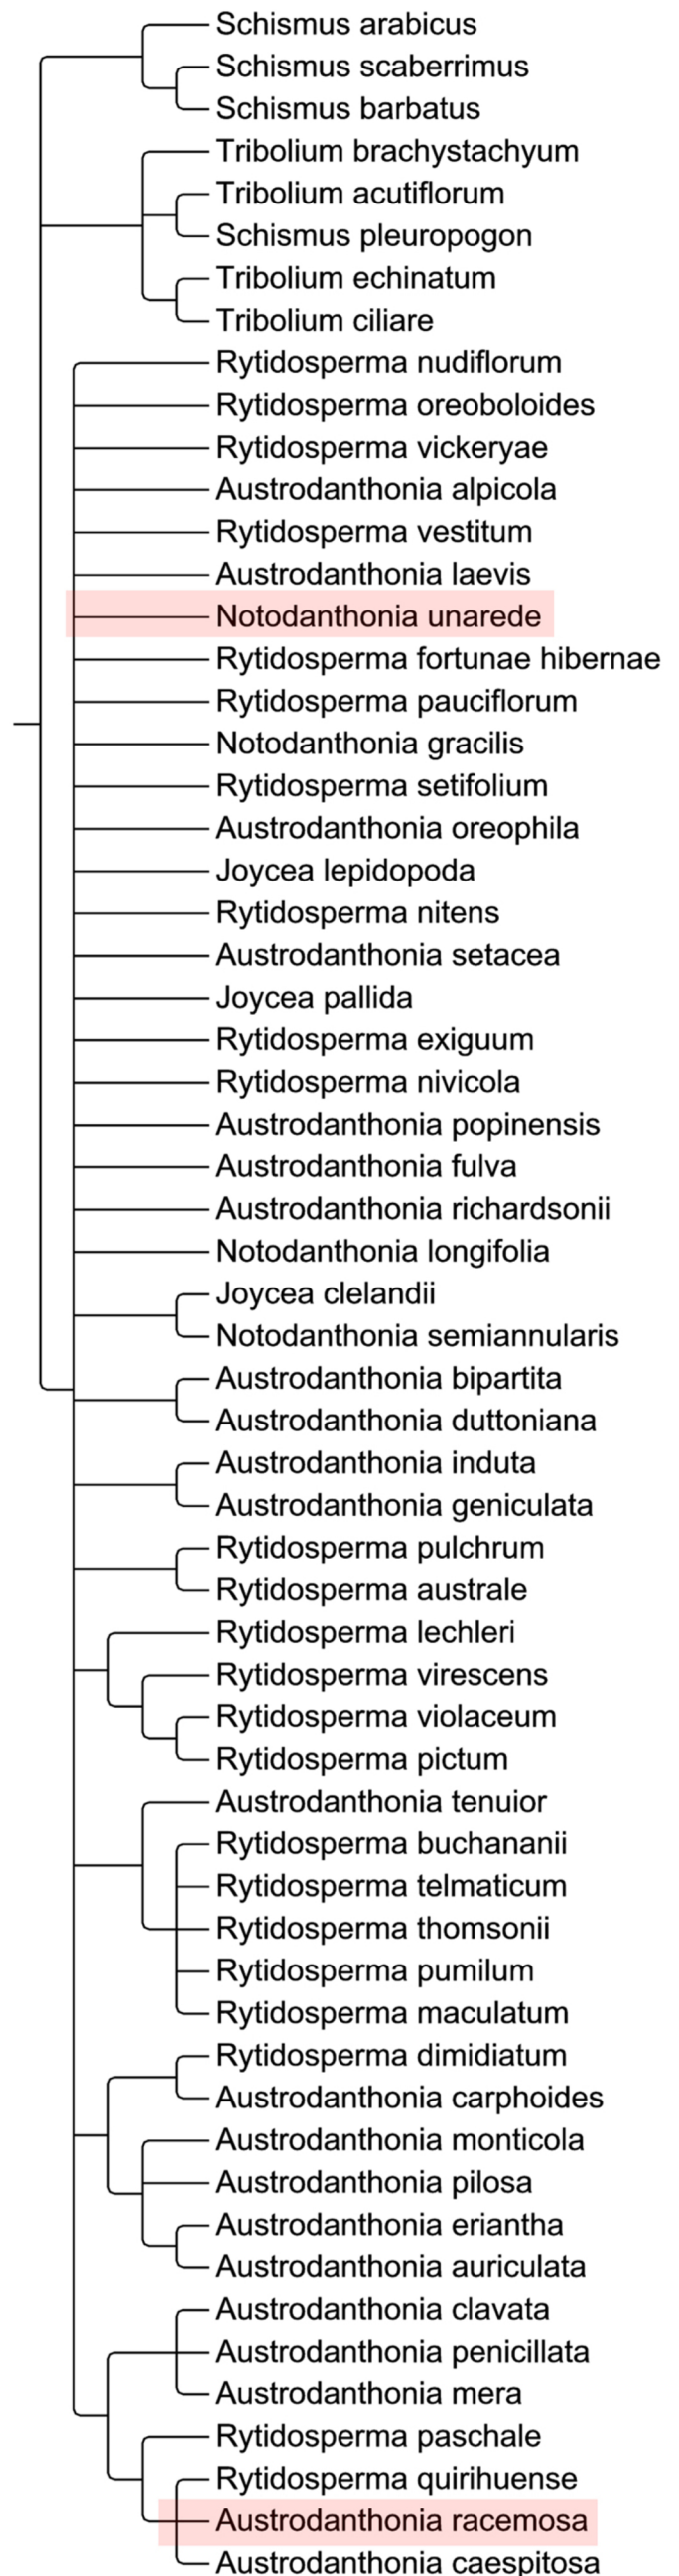

Figure S7. *Rytidosperma* nrDNA and cpDNA phylogenetic reconstructions



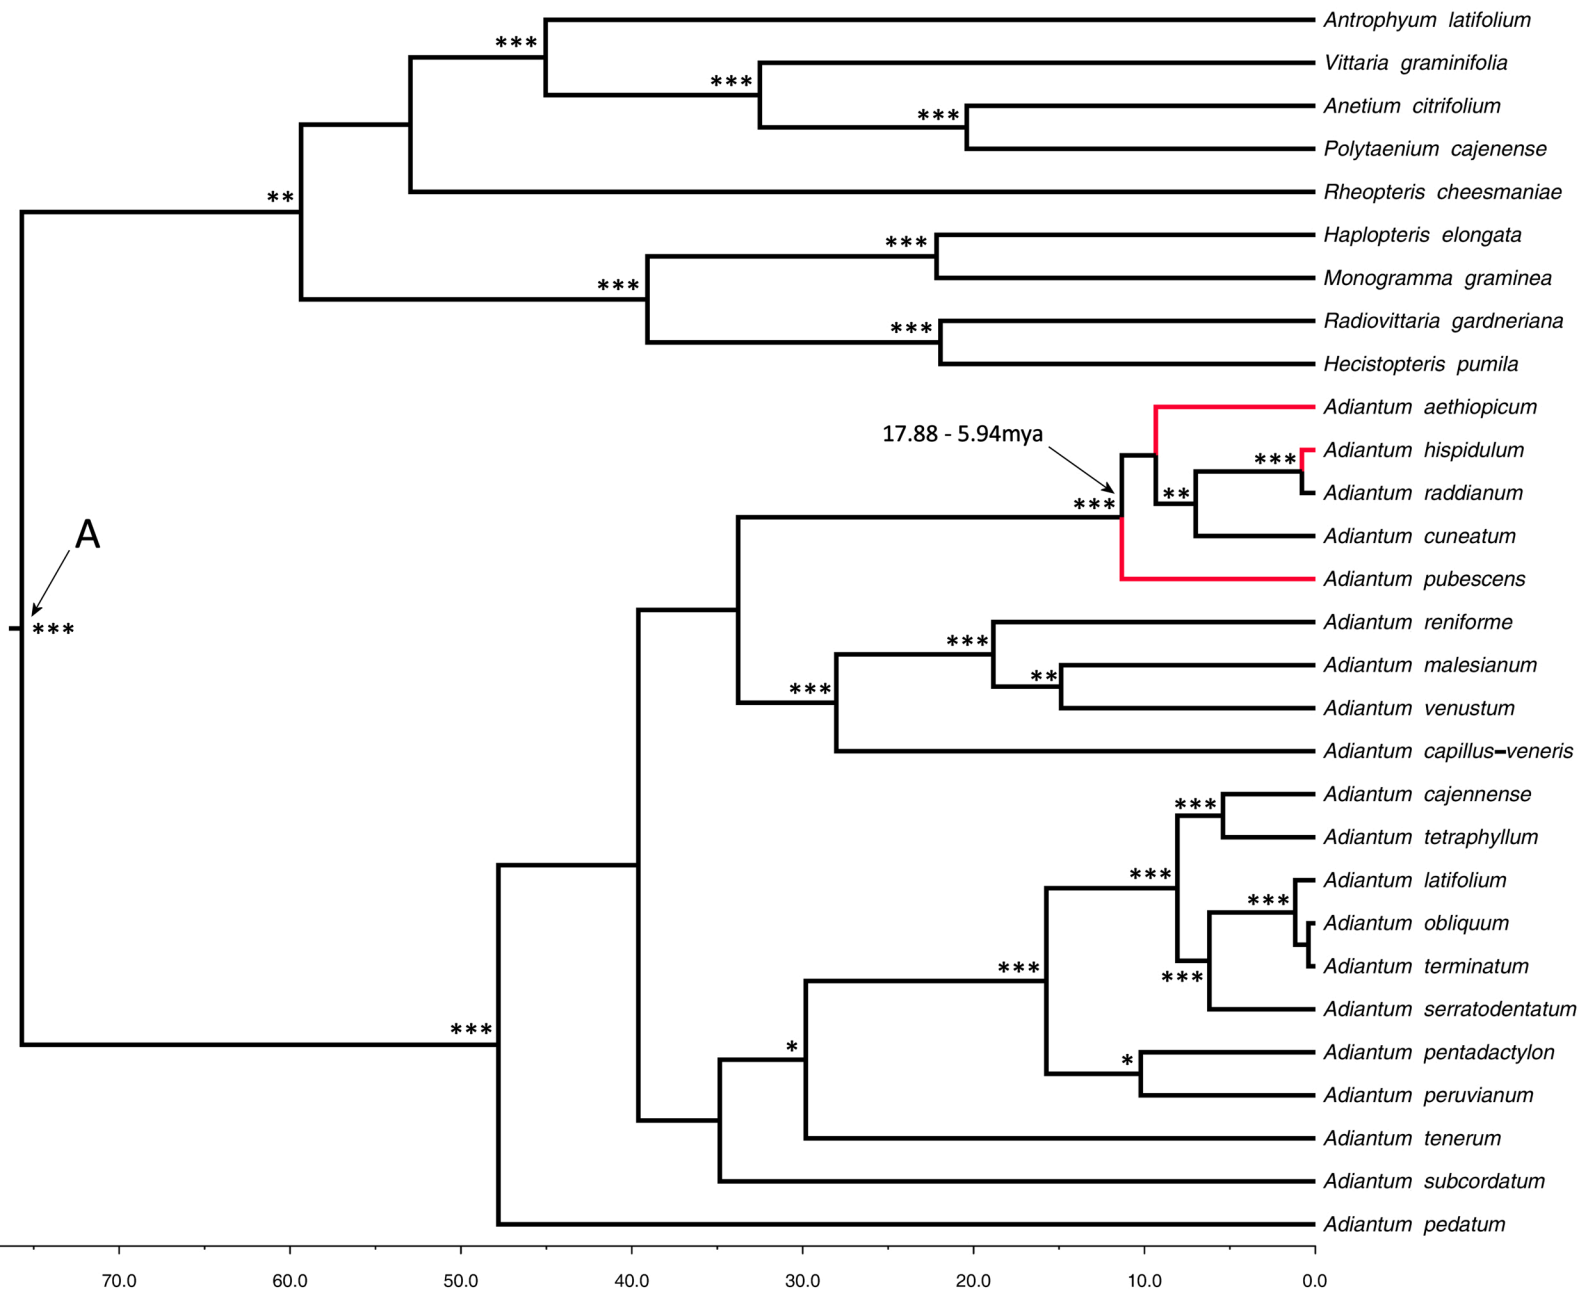

Figure S8. *Adiantum* Bayesian phylogenetic reconstruction

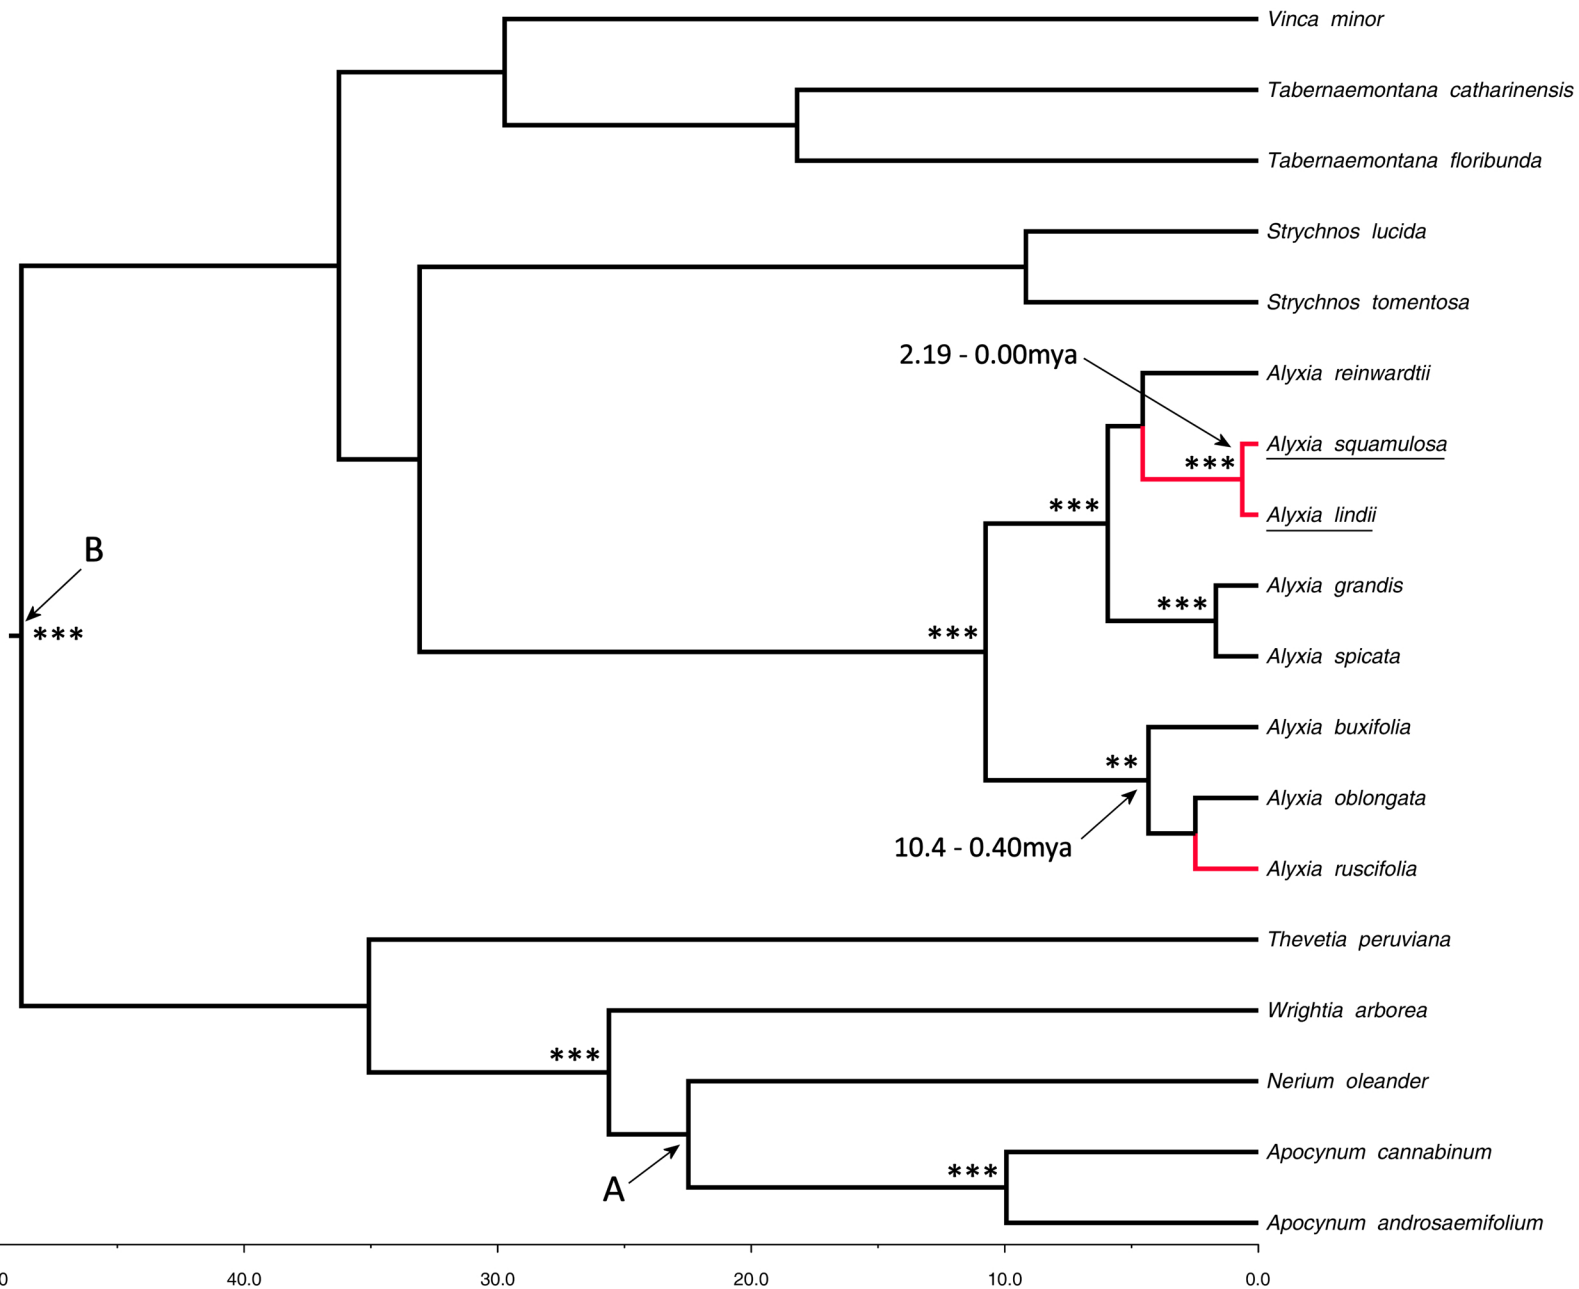

Figure S9 *Alyxia* Bayesian phylogenetic reconstruction





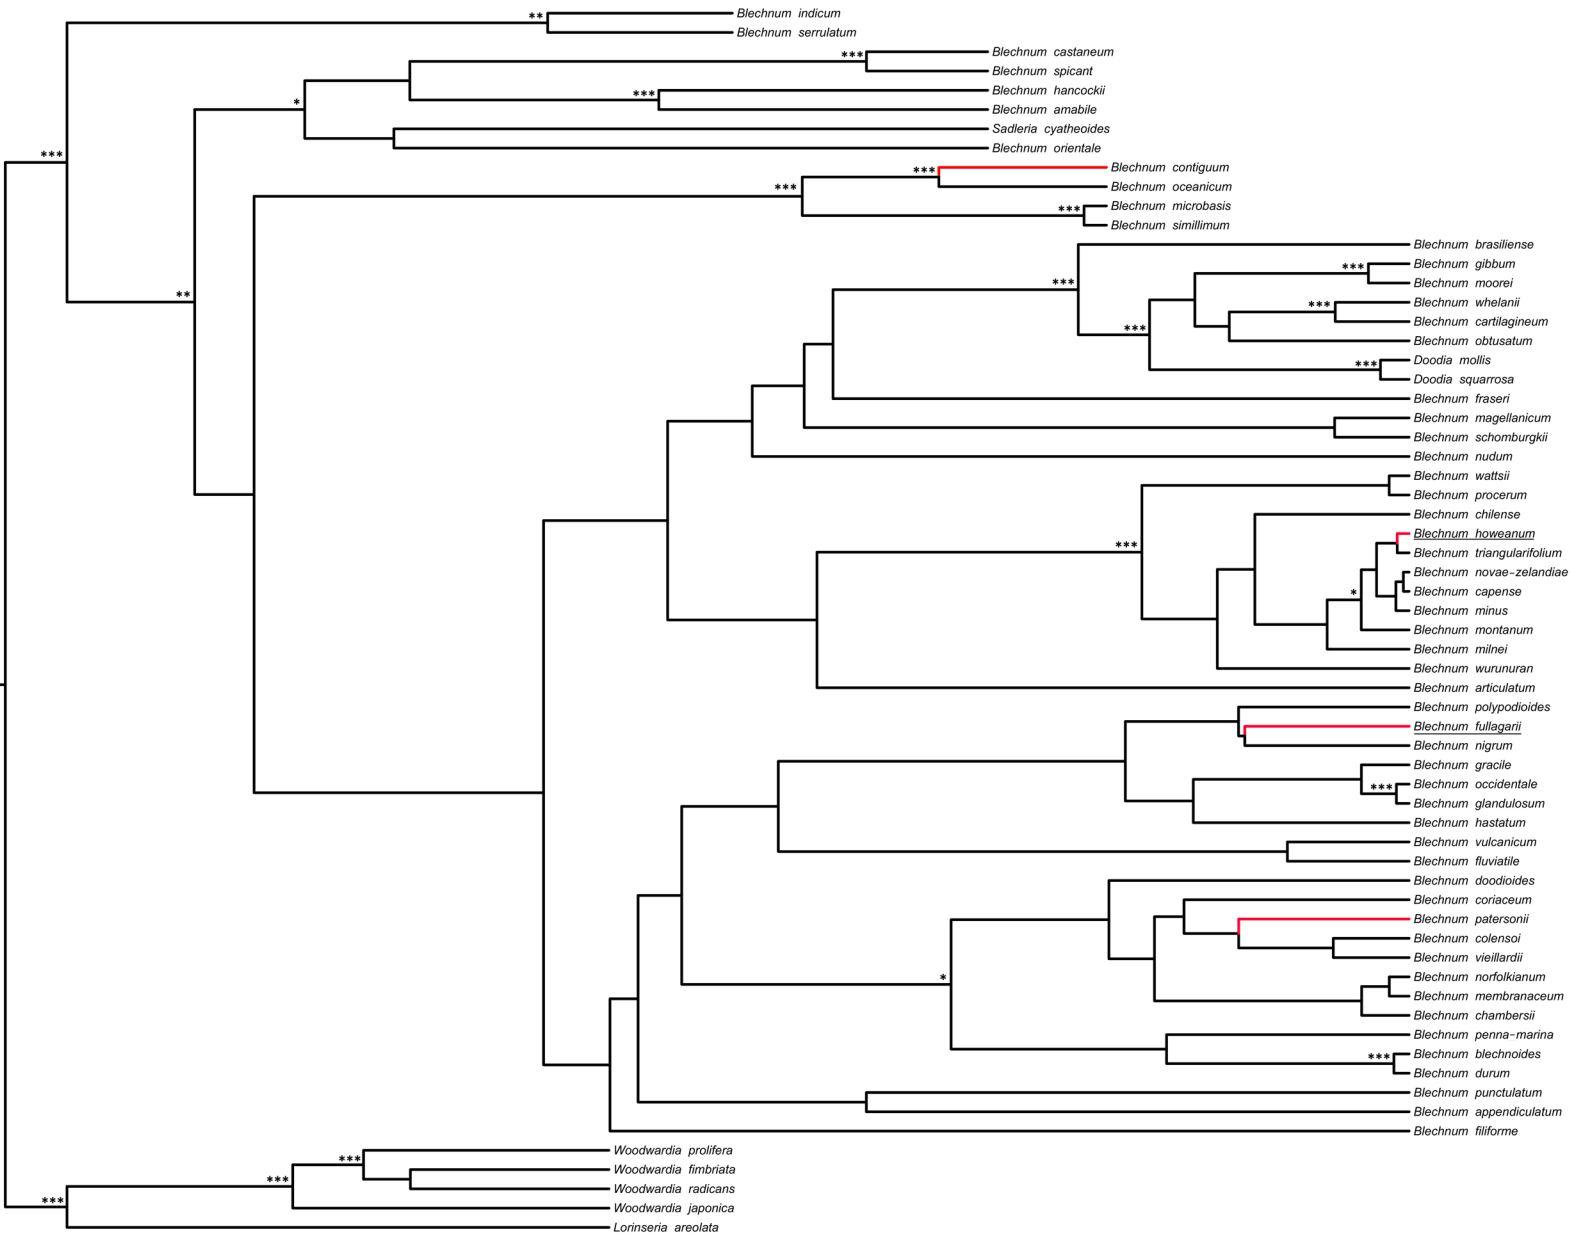

Figure S11. *Blechnum* Bayesian phylogenetic reconstruction

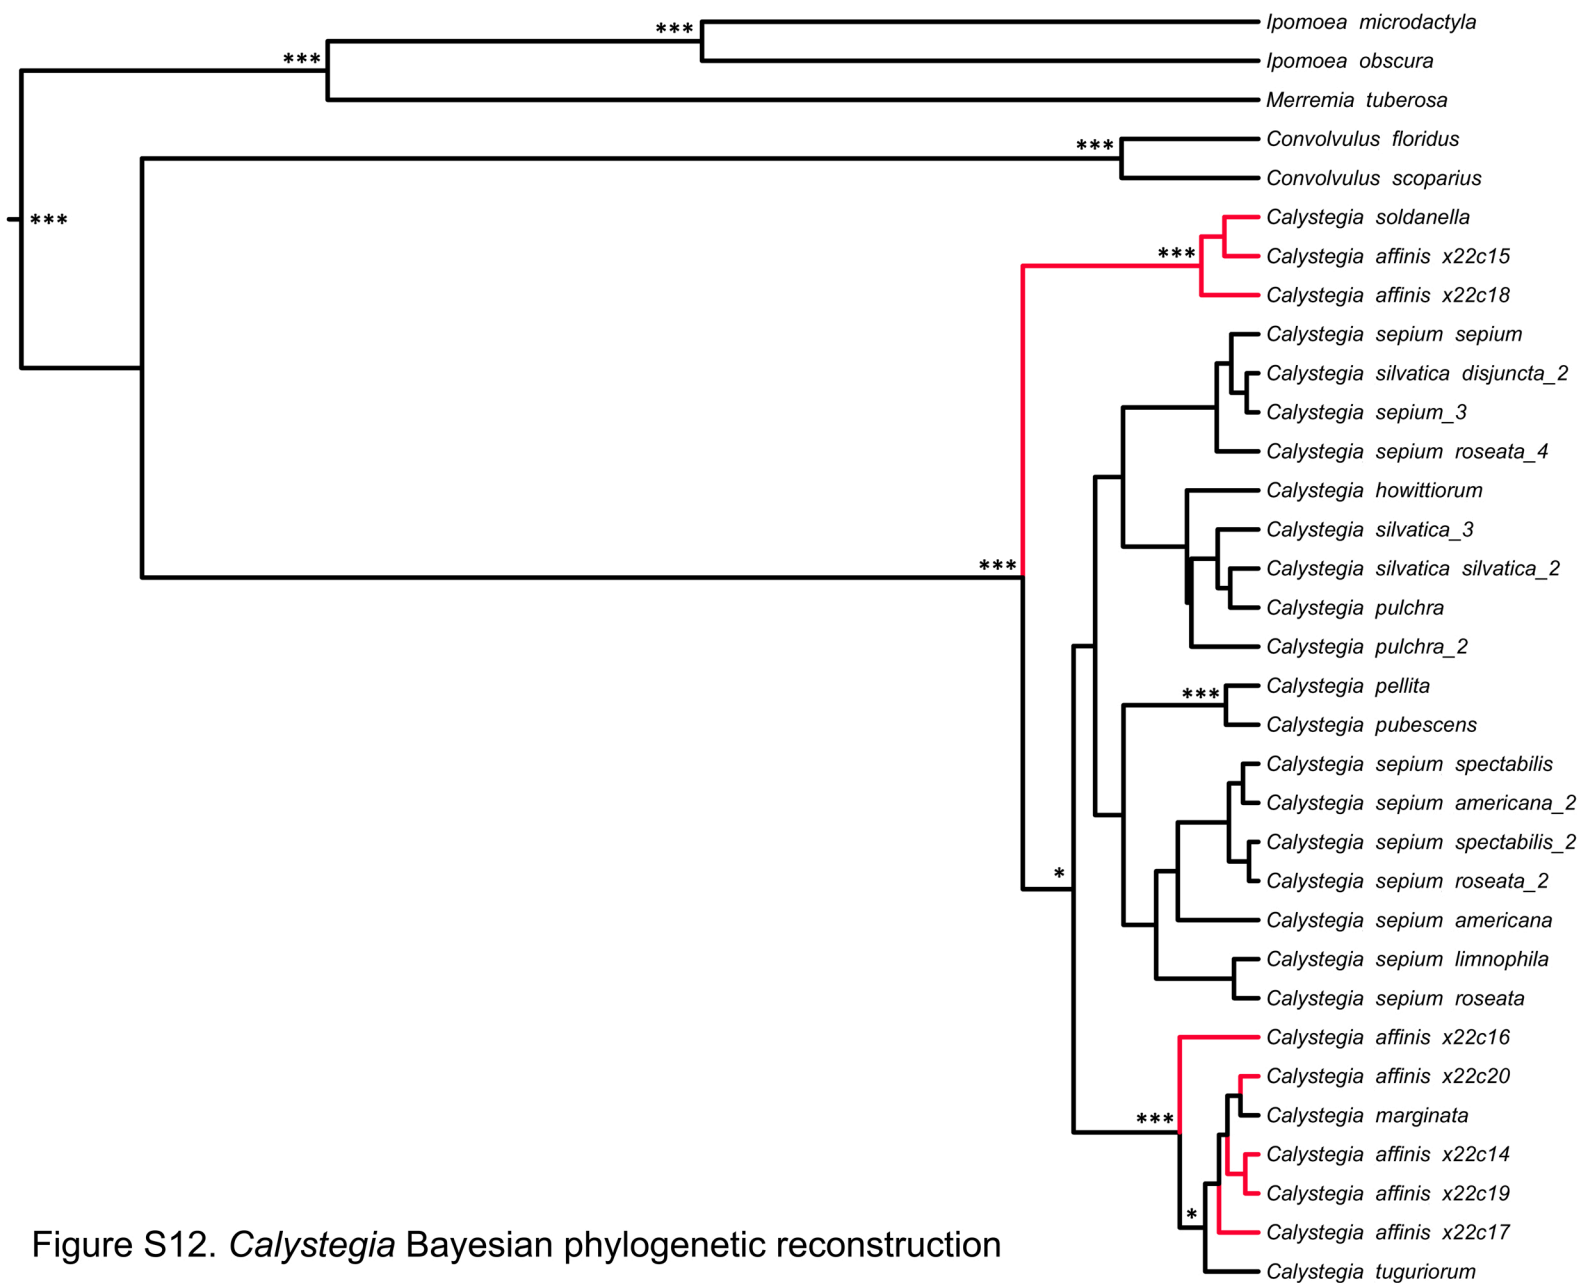

Figure S12. *Calystegia* Bayesian phylogenetic reconstruction

Figure S13. *Carex* Bayesian phylogenetic reconstruction

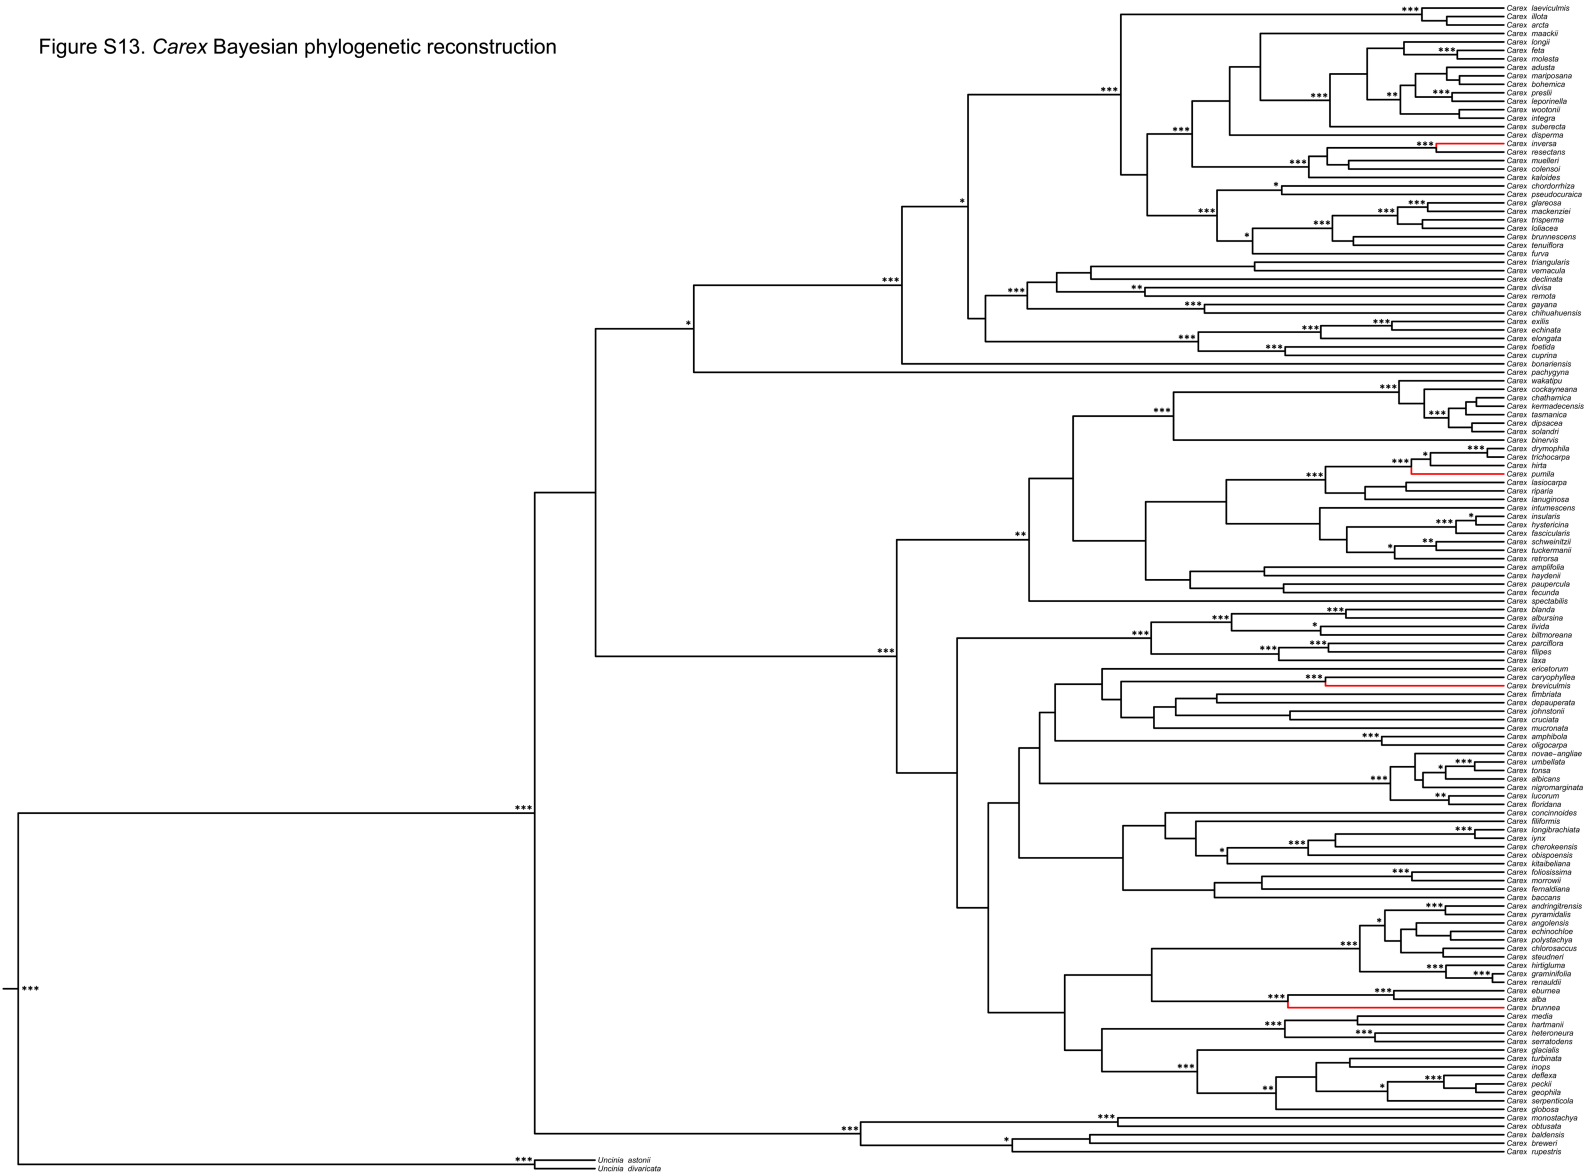

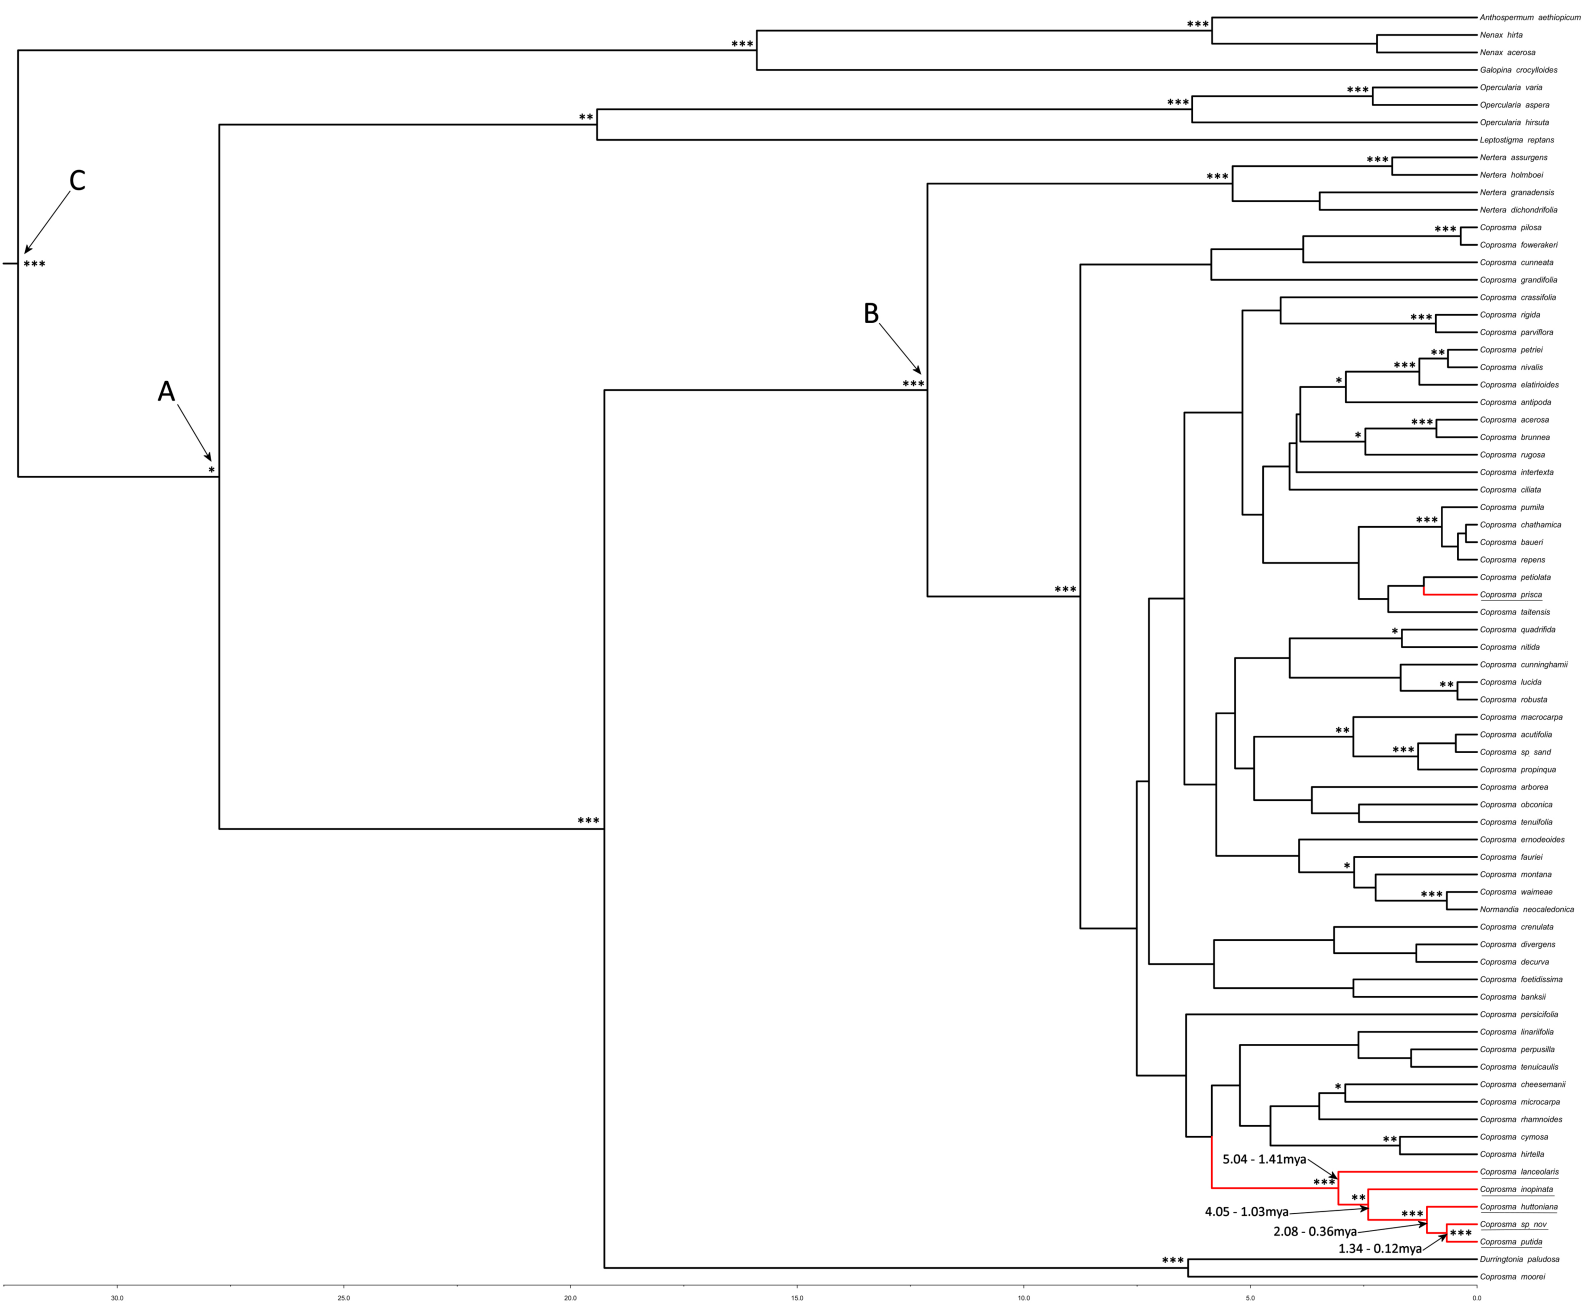

Figure S14. *Coprosma* Bayesian phylogenetic reconstruction

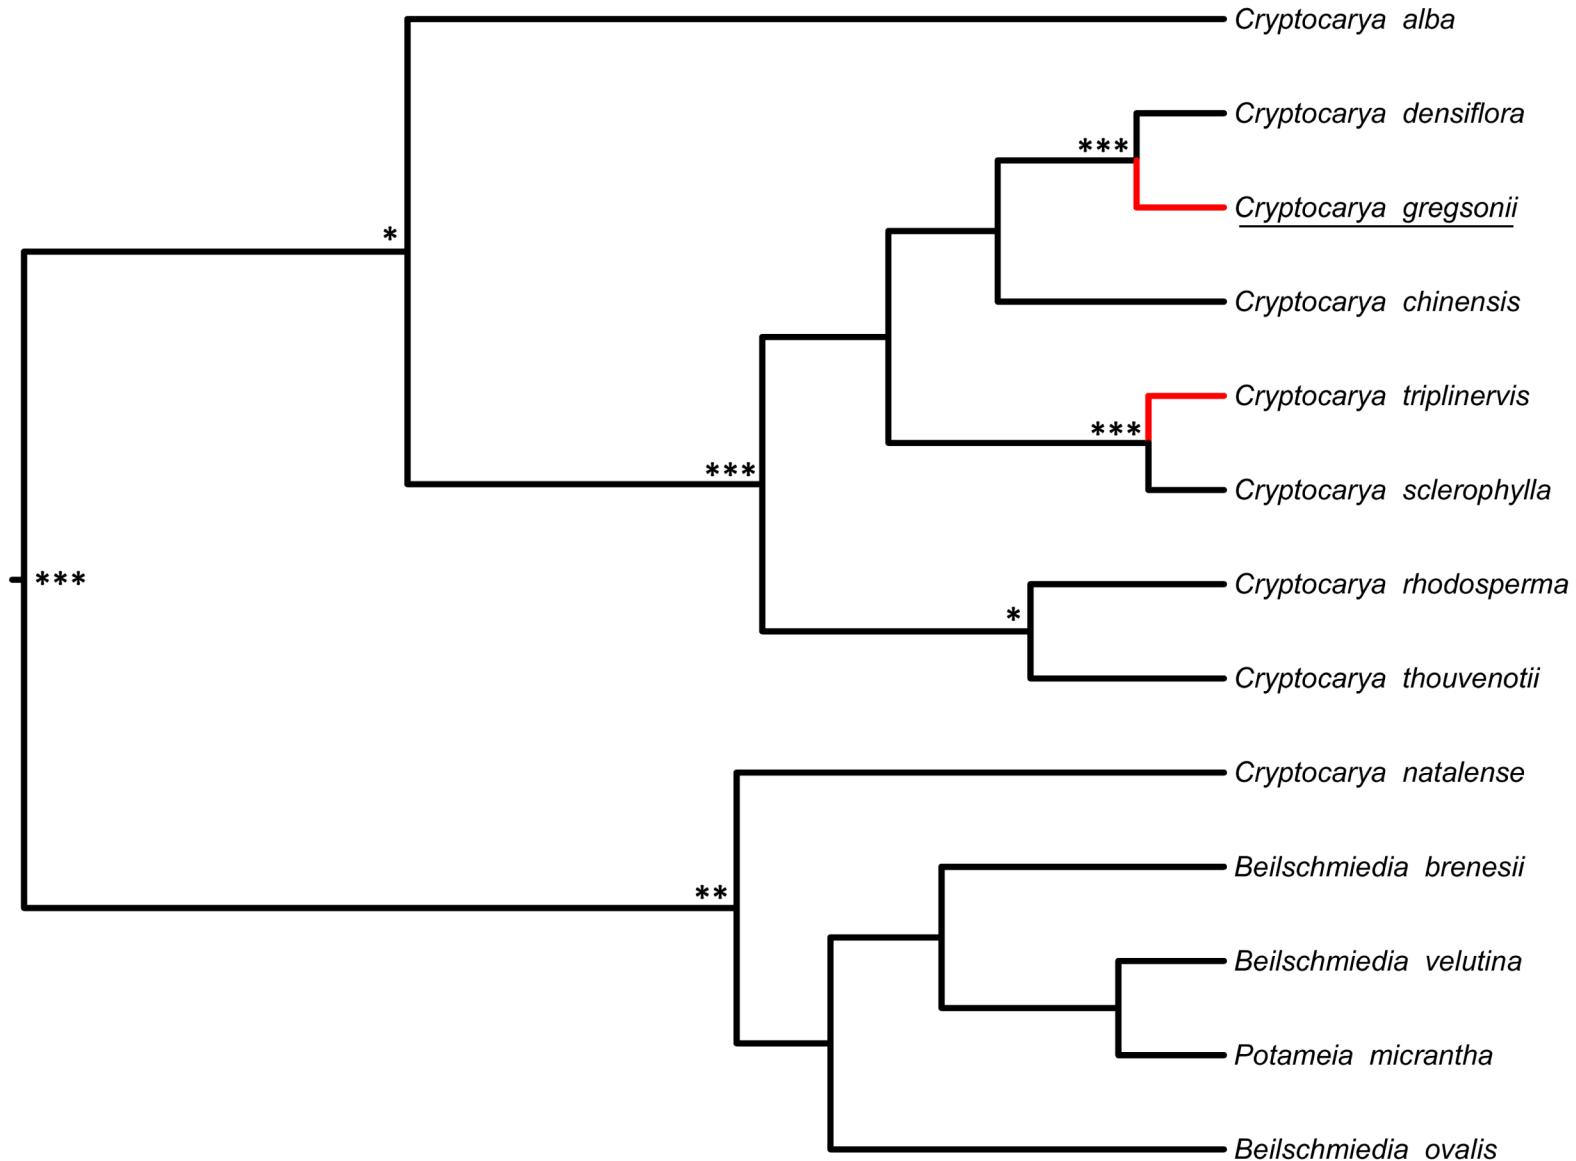

Figure S15. *Cryptocarya* Bayesian phylogenetic reconstruction

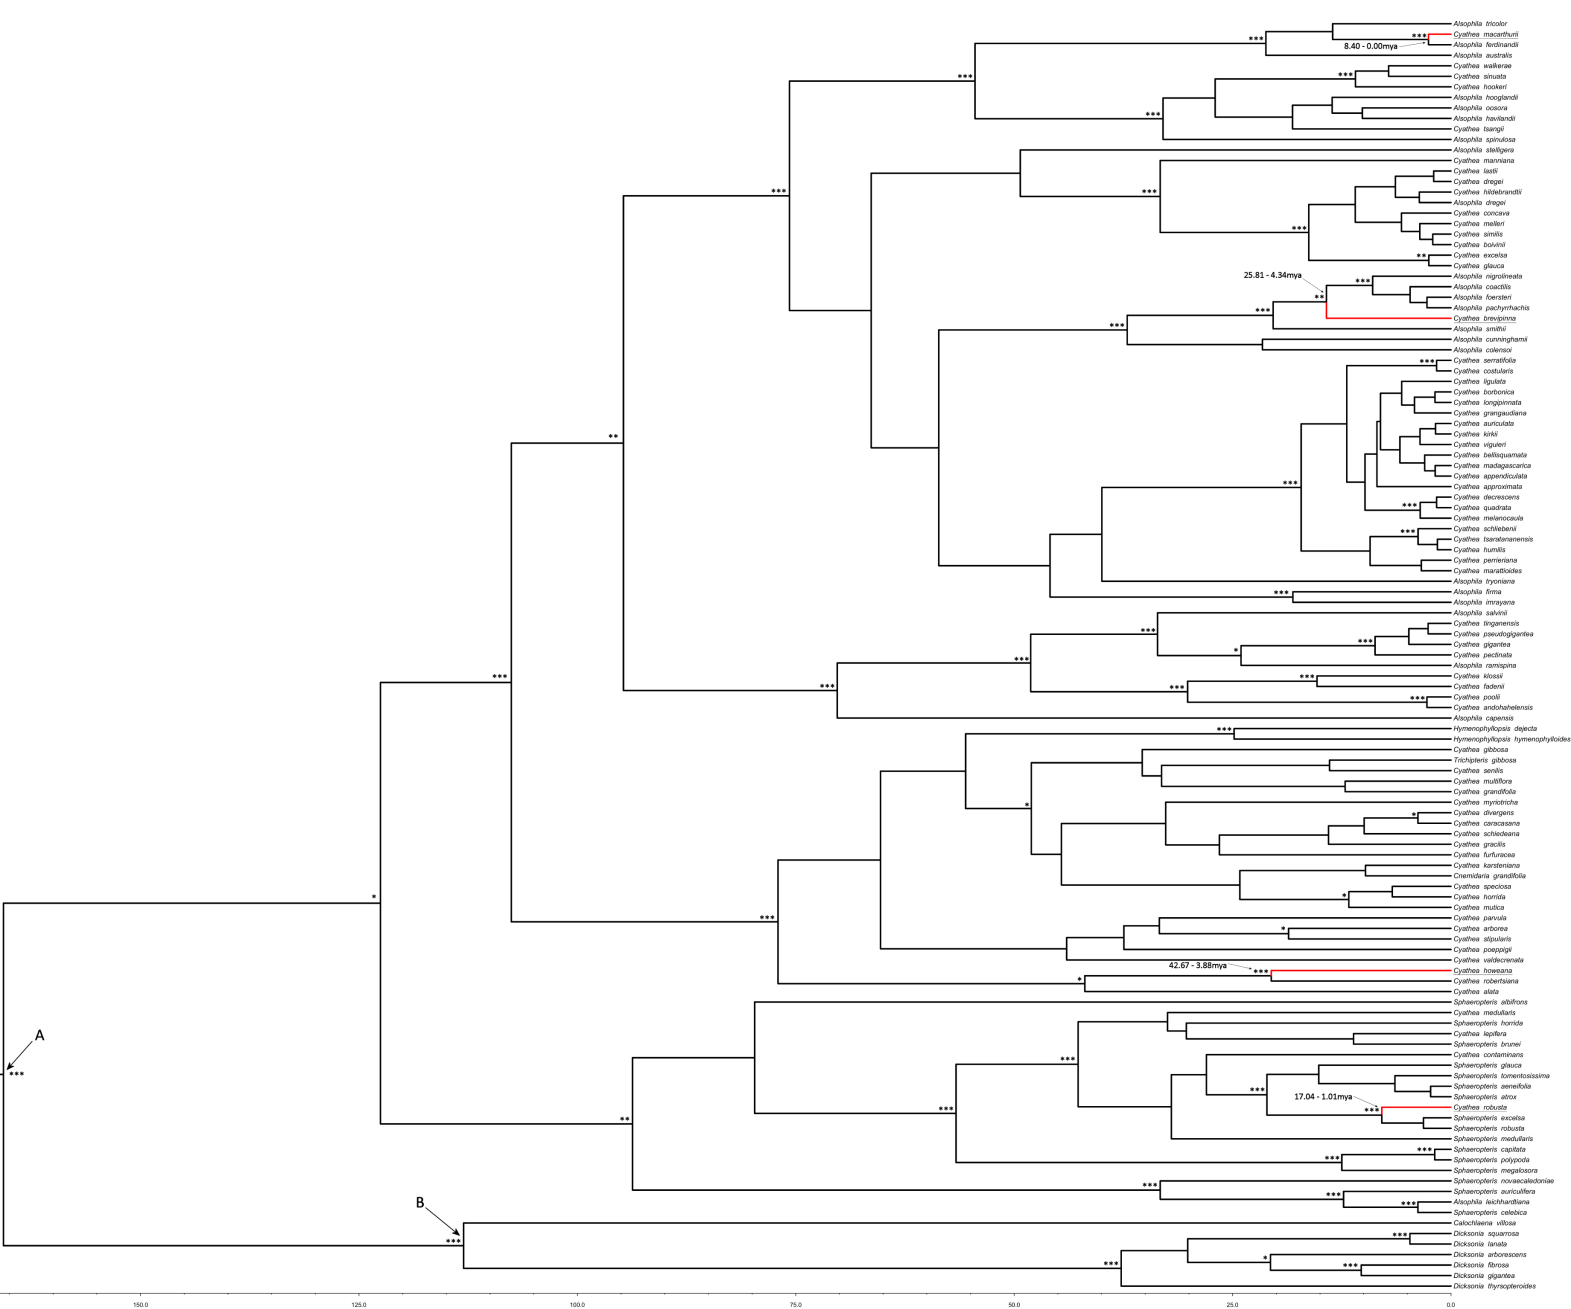

Figure S16. *Cyathea* Bayesian phylogenetic reconstruction

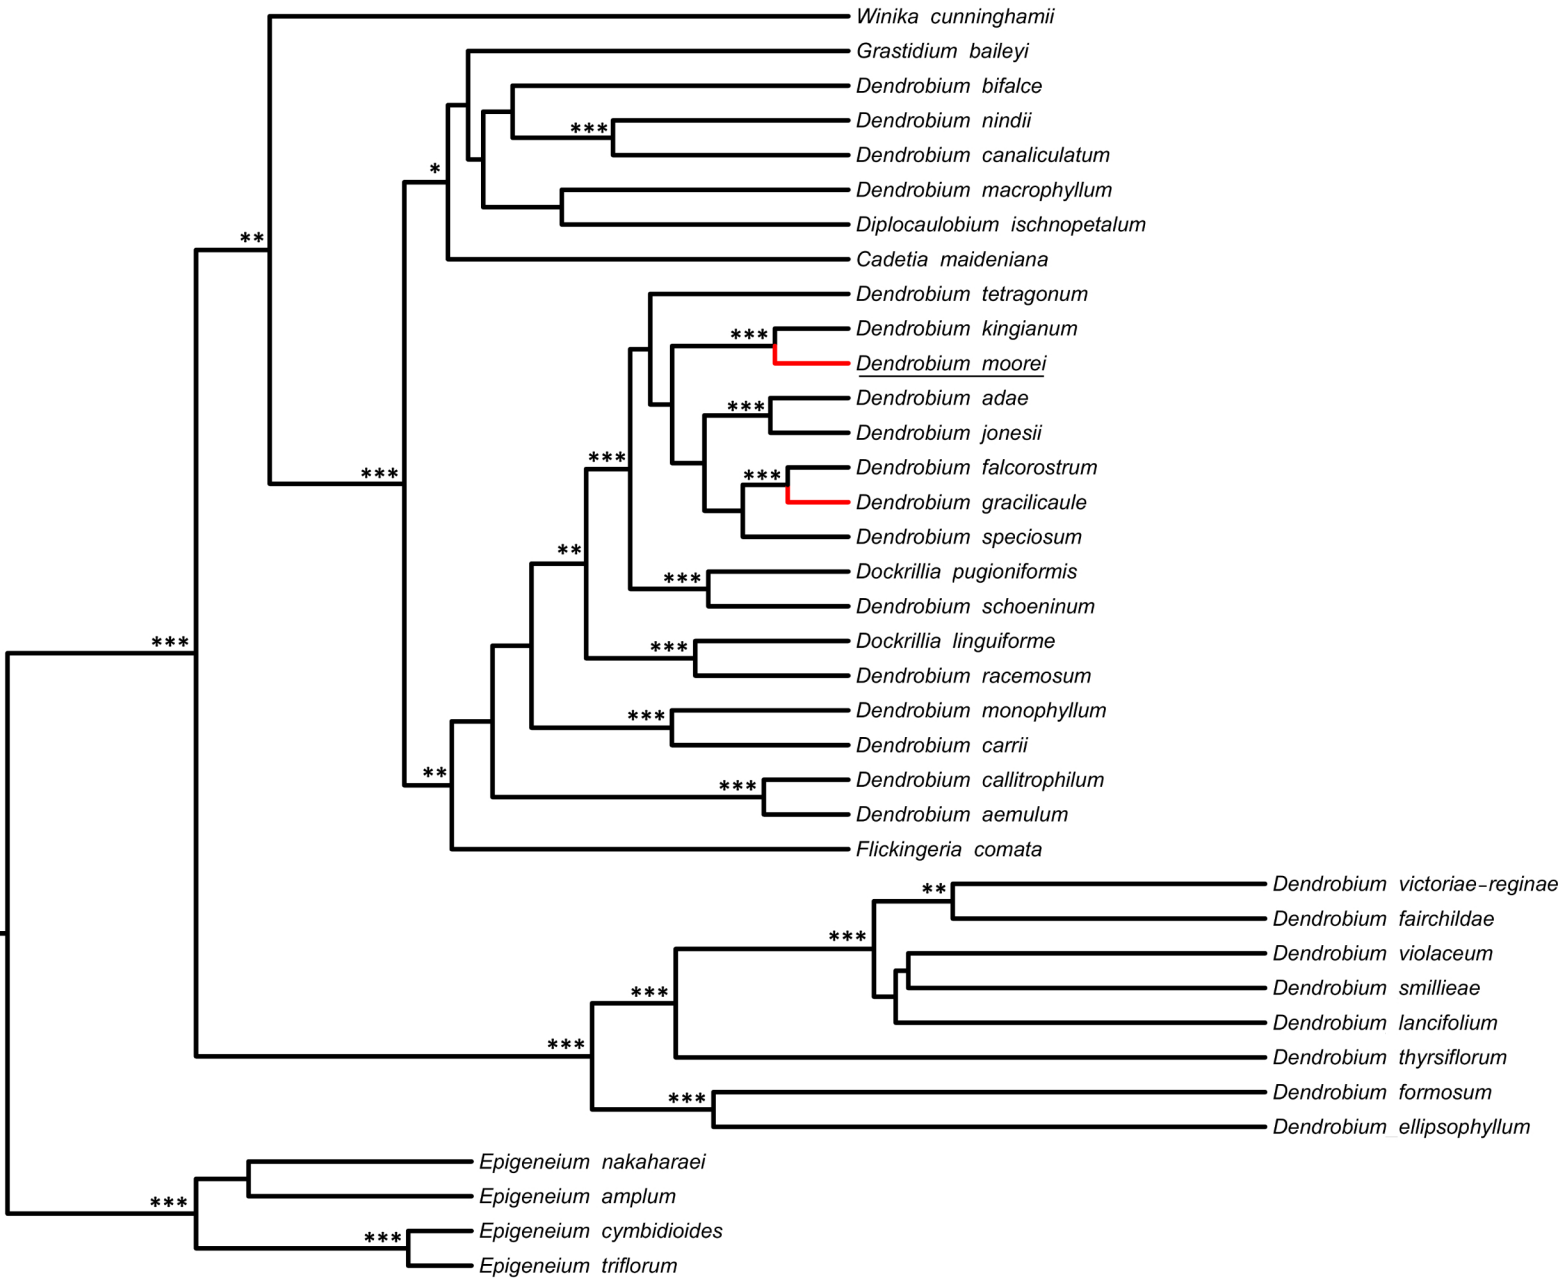

Figure S17. *Dendrobium* Bayesian phylogenetic reconstruction



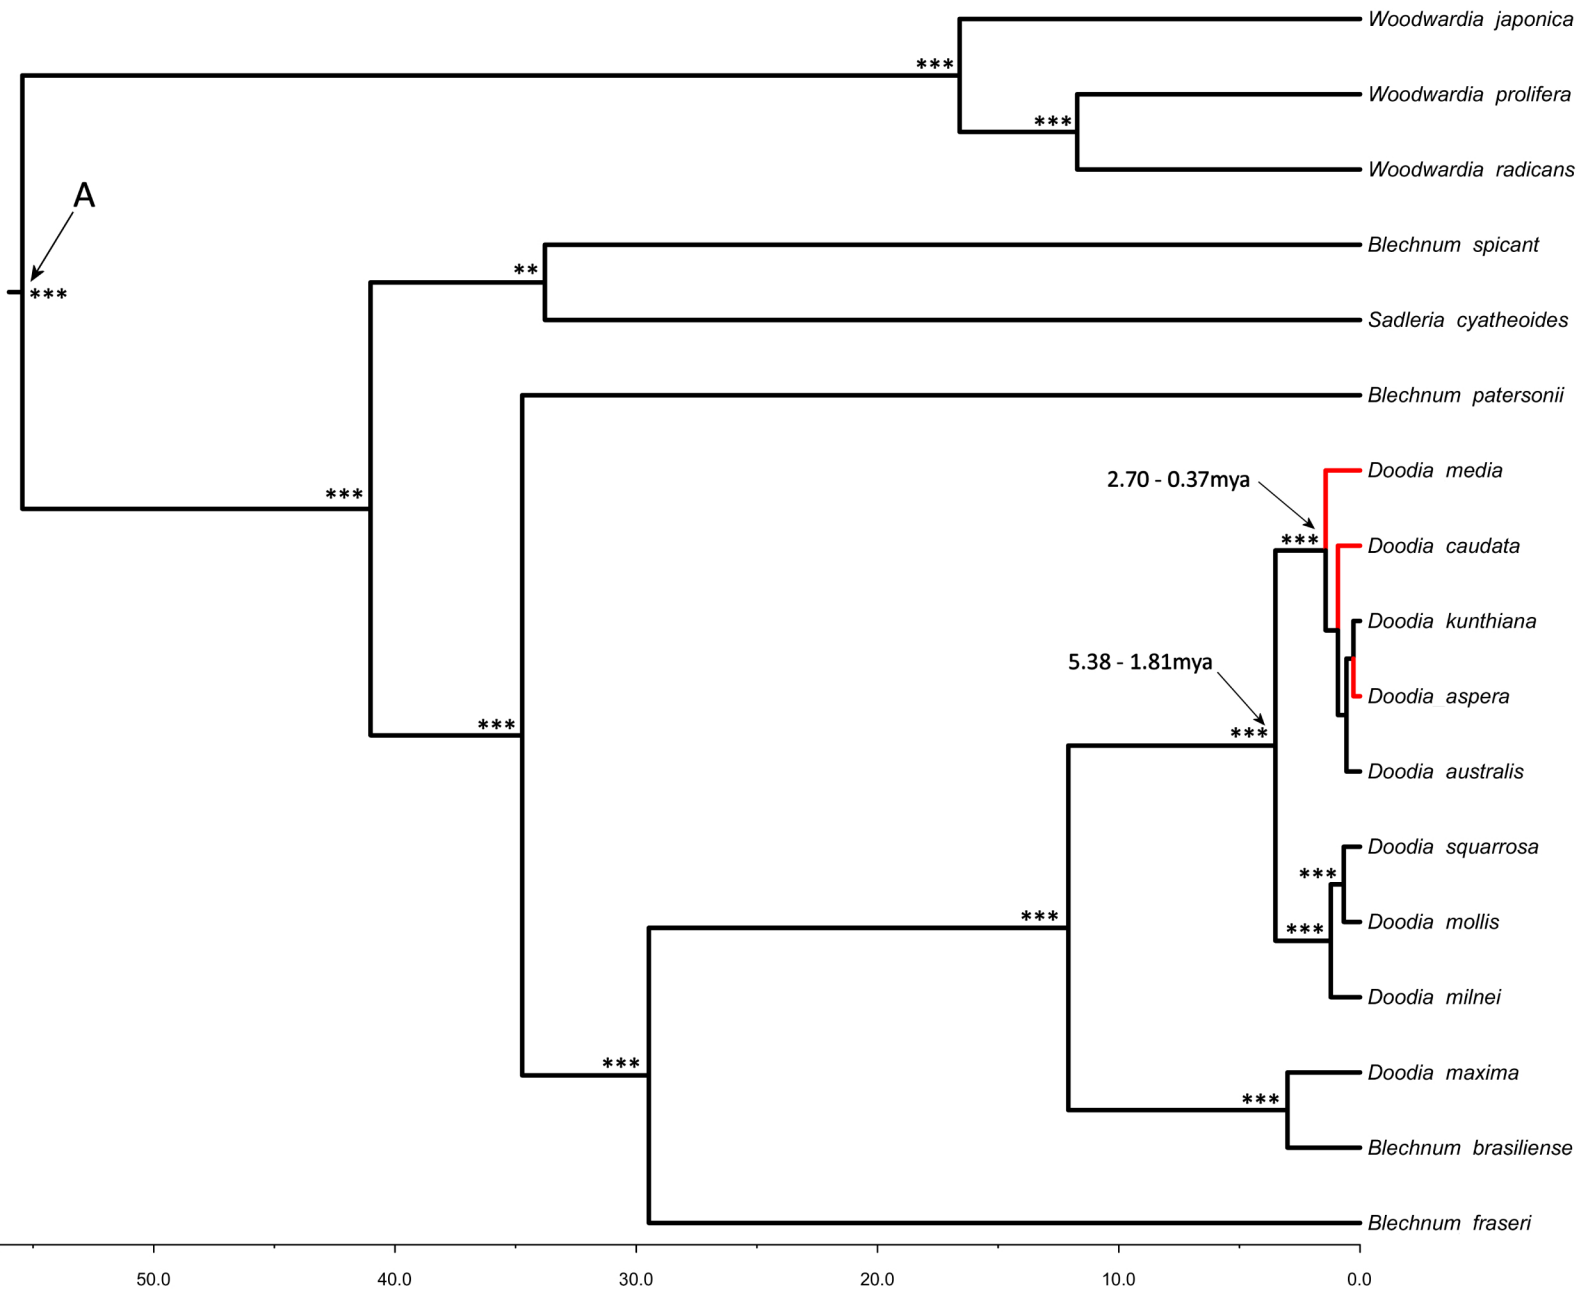

Figure S18. *Doodia* Bayesian phylogenetic reconstruction

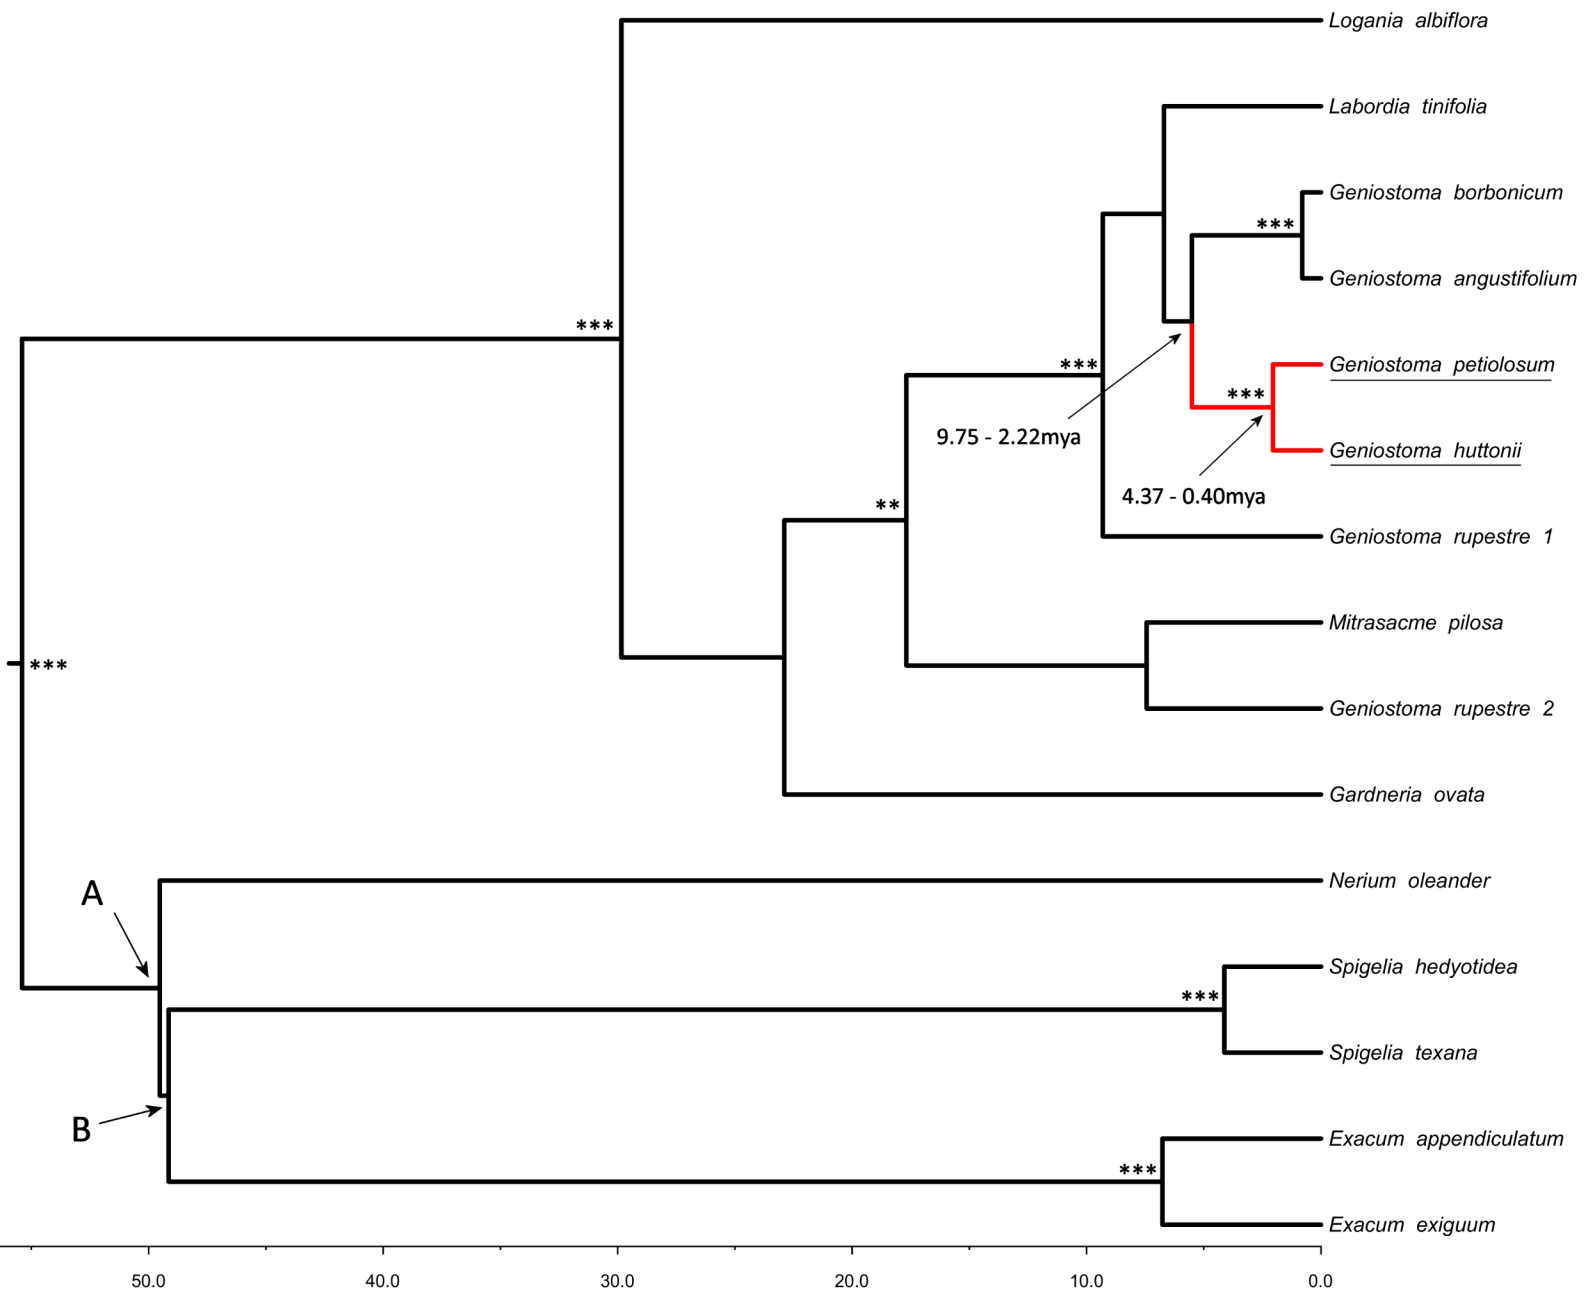

Figure S19. *Geniostoma* Bayesian phylogenetic reconstruction

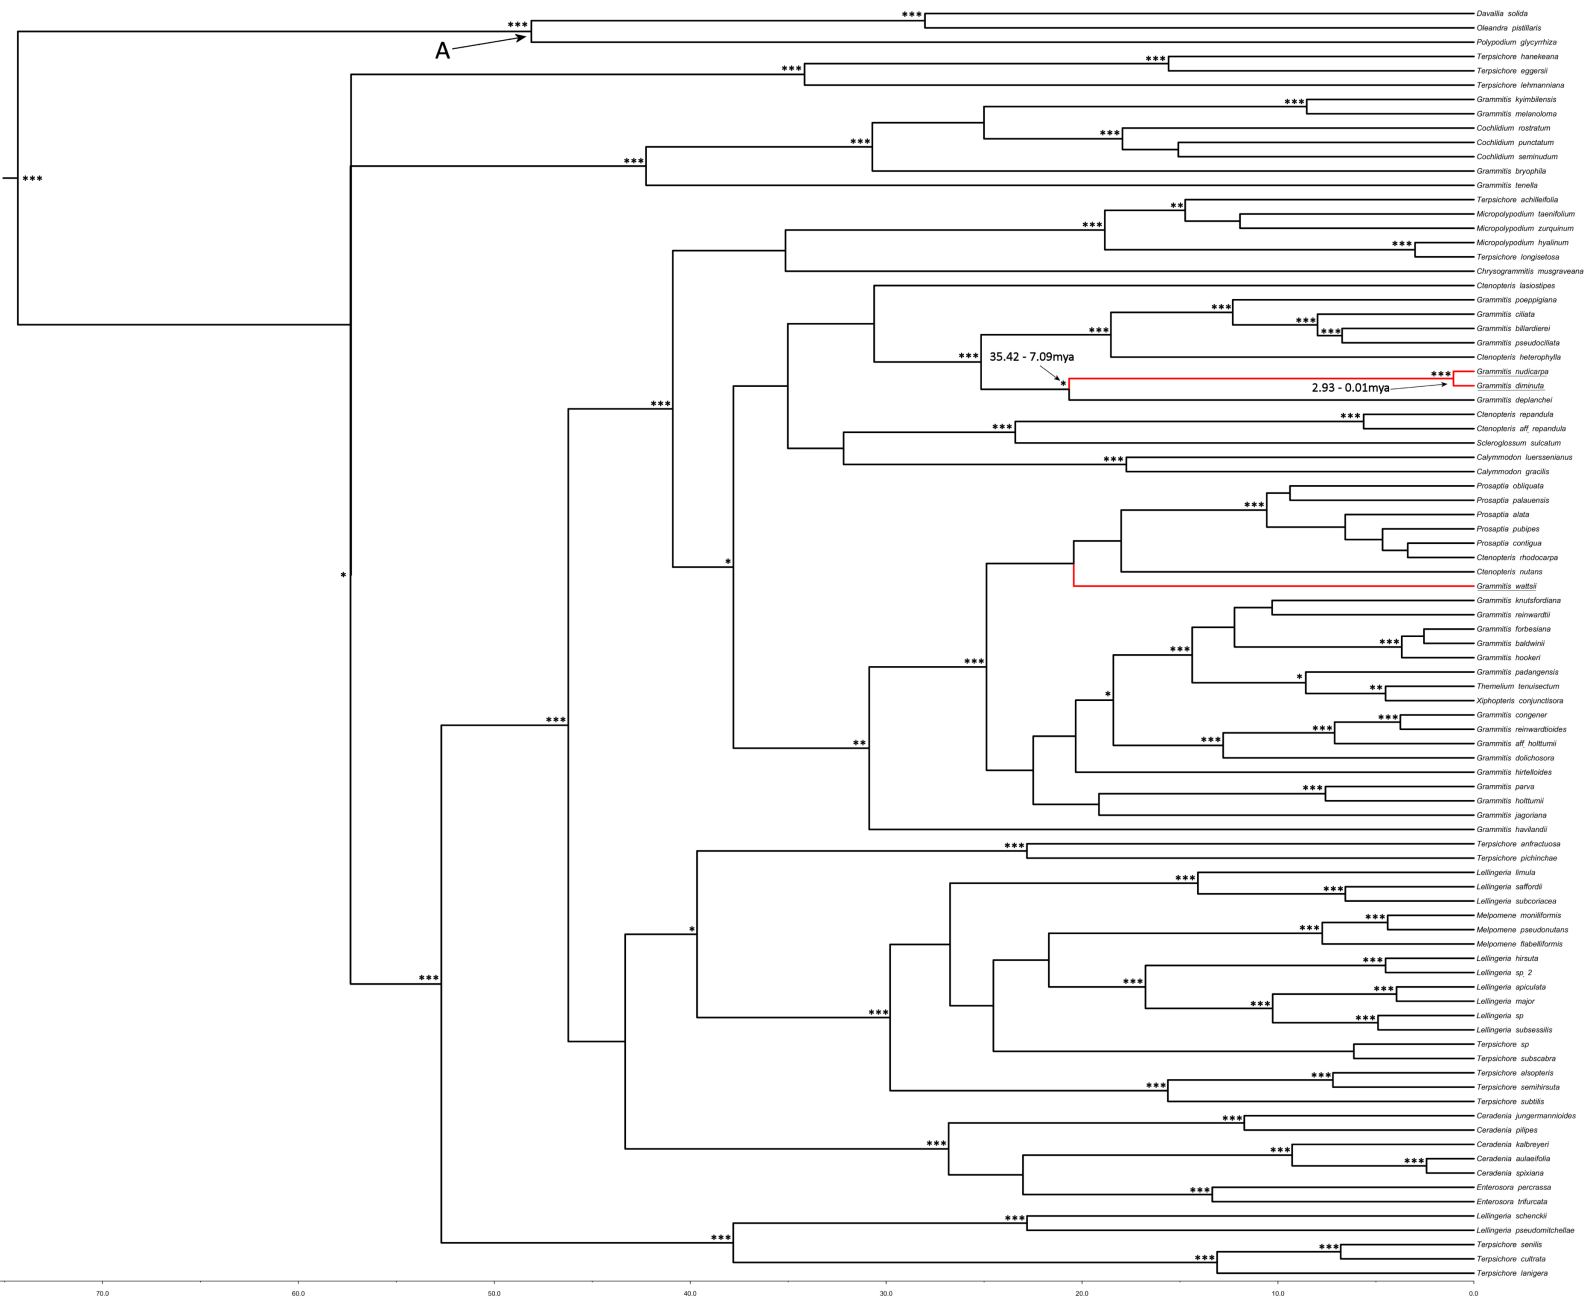

Figure S20. *Grammitis* Bayesian phylogenetic reconstruction

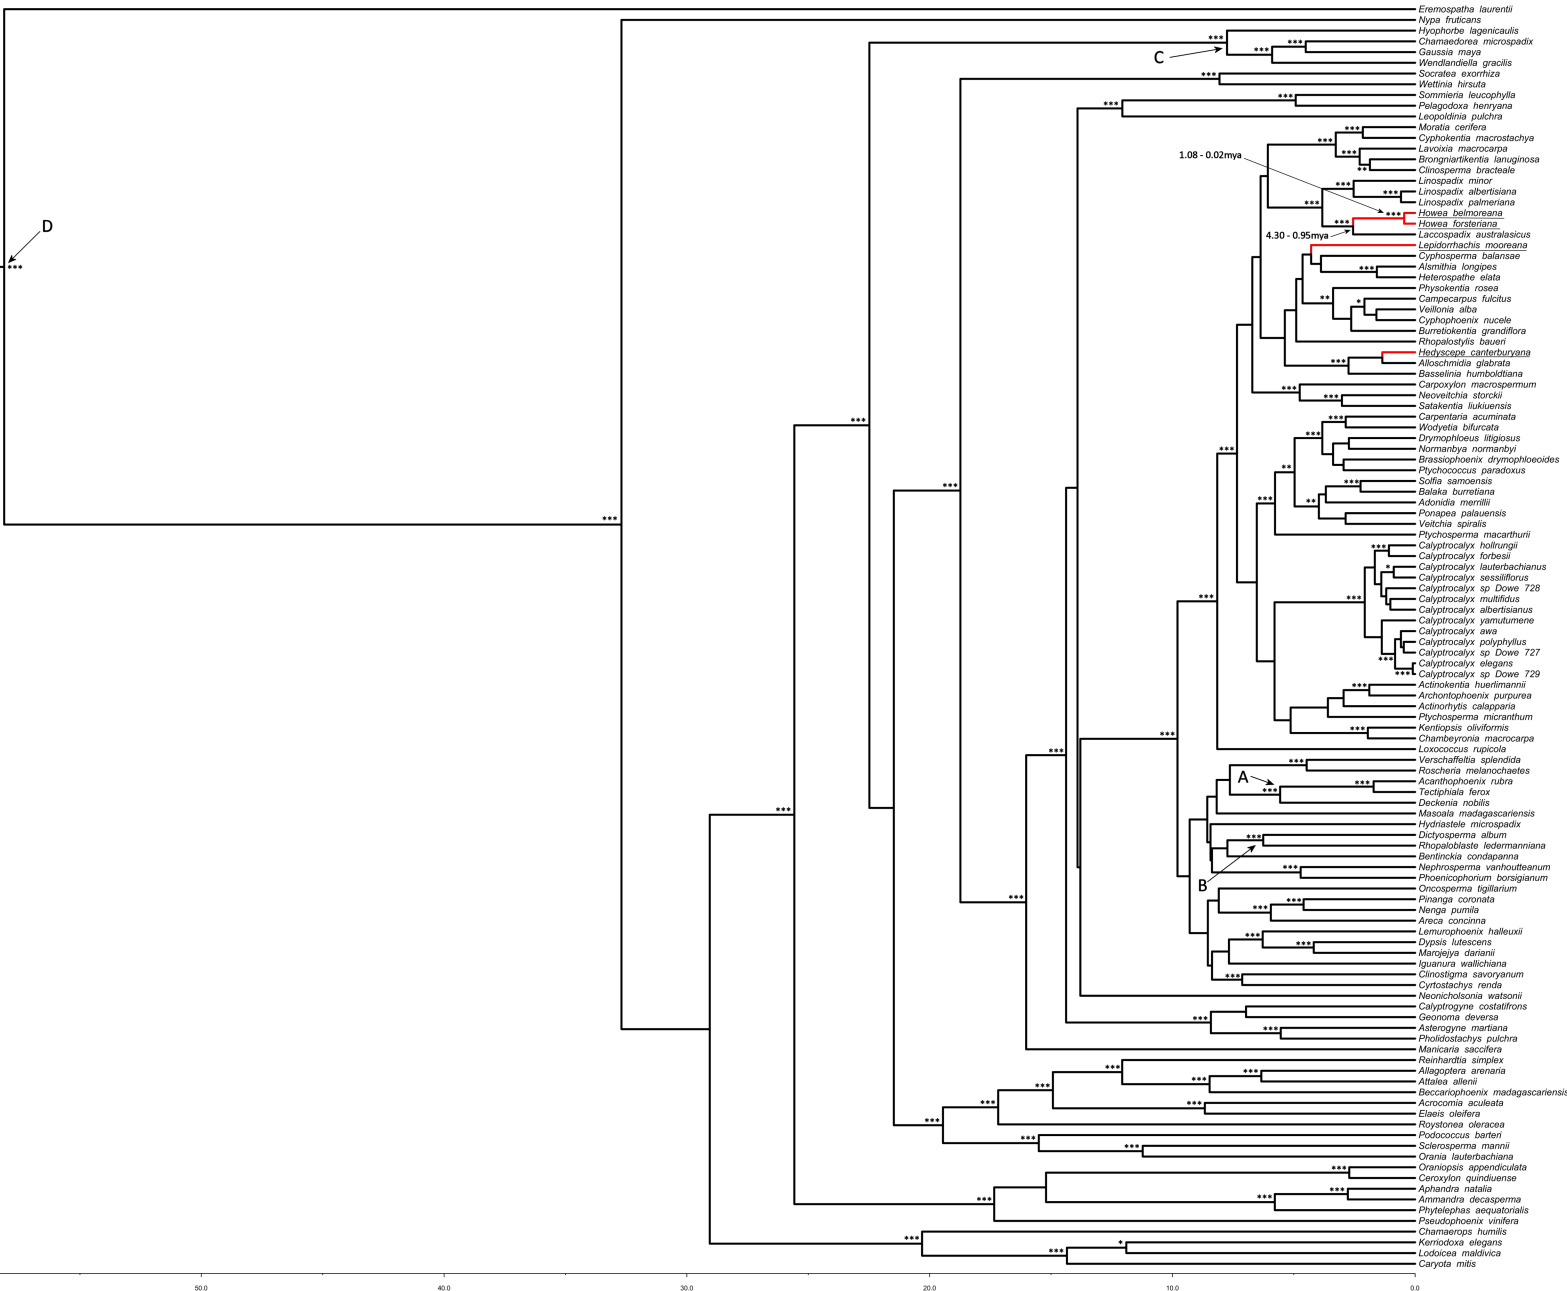

Figure S21. *Howea* Bayesian phylogenetic reconstruction

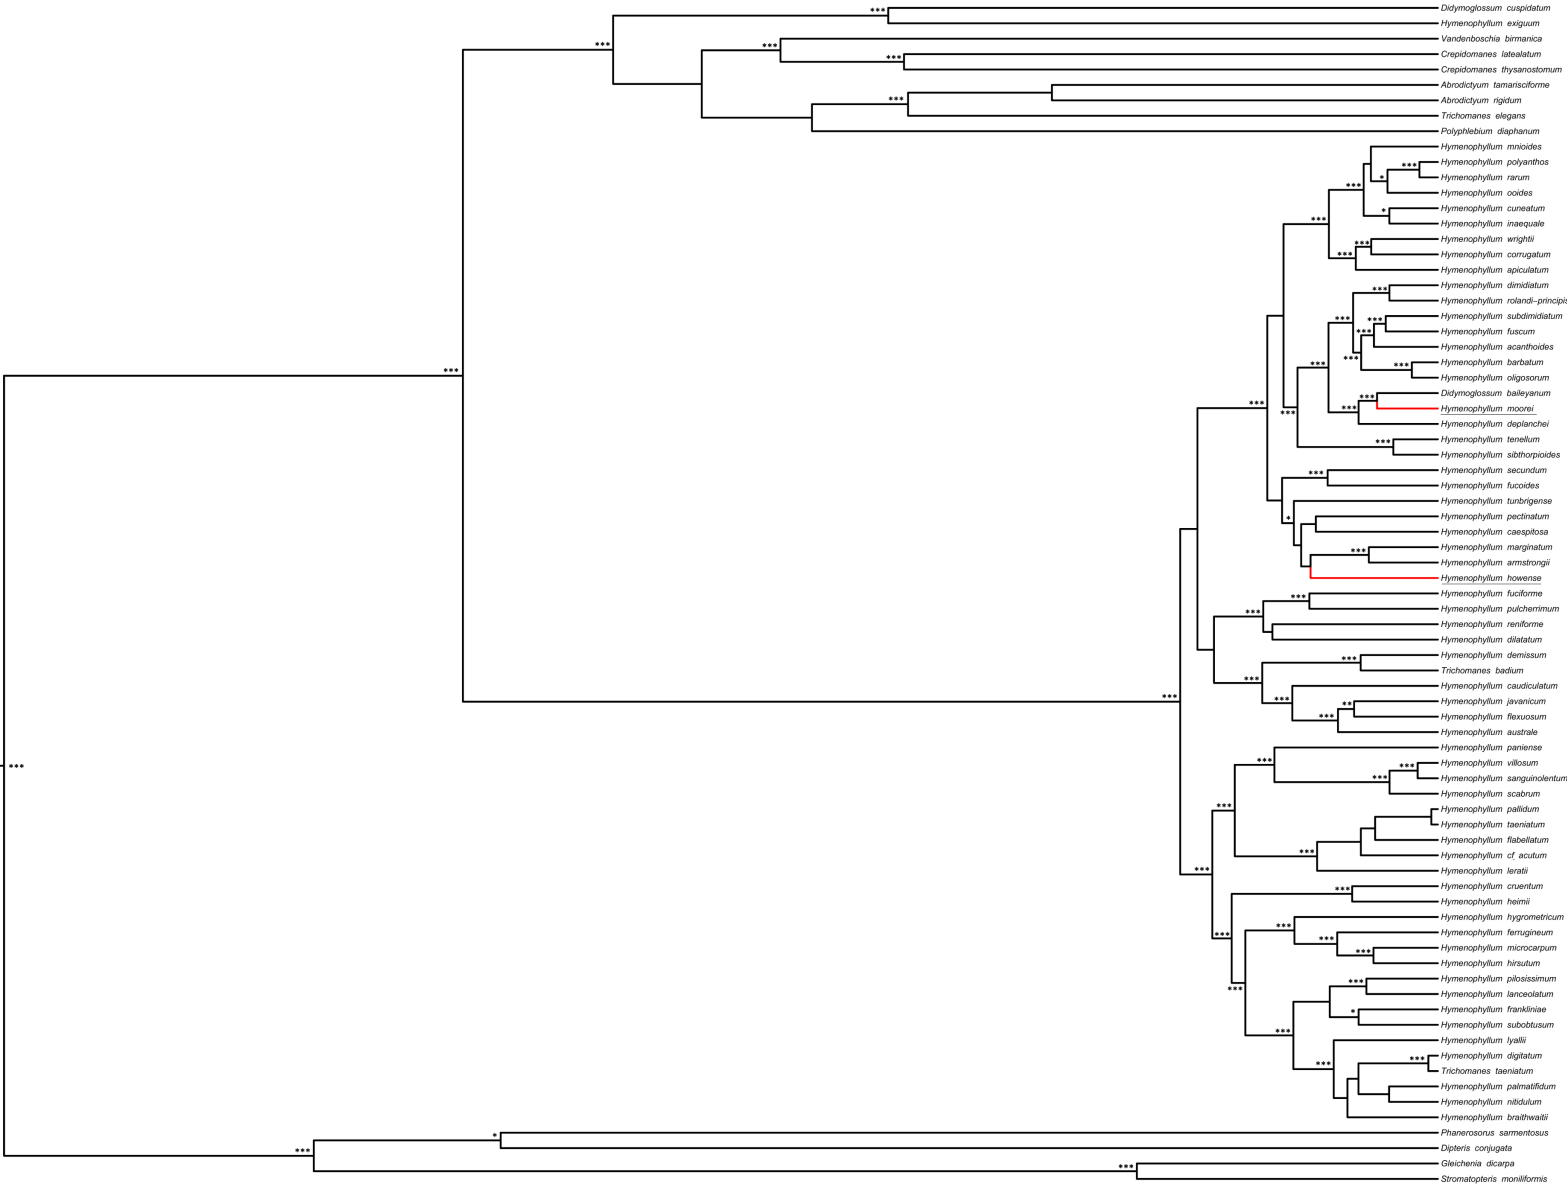

Figure S22. *Hymenophyllum* Bayesian phylogenetic reconstruction

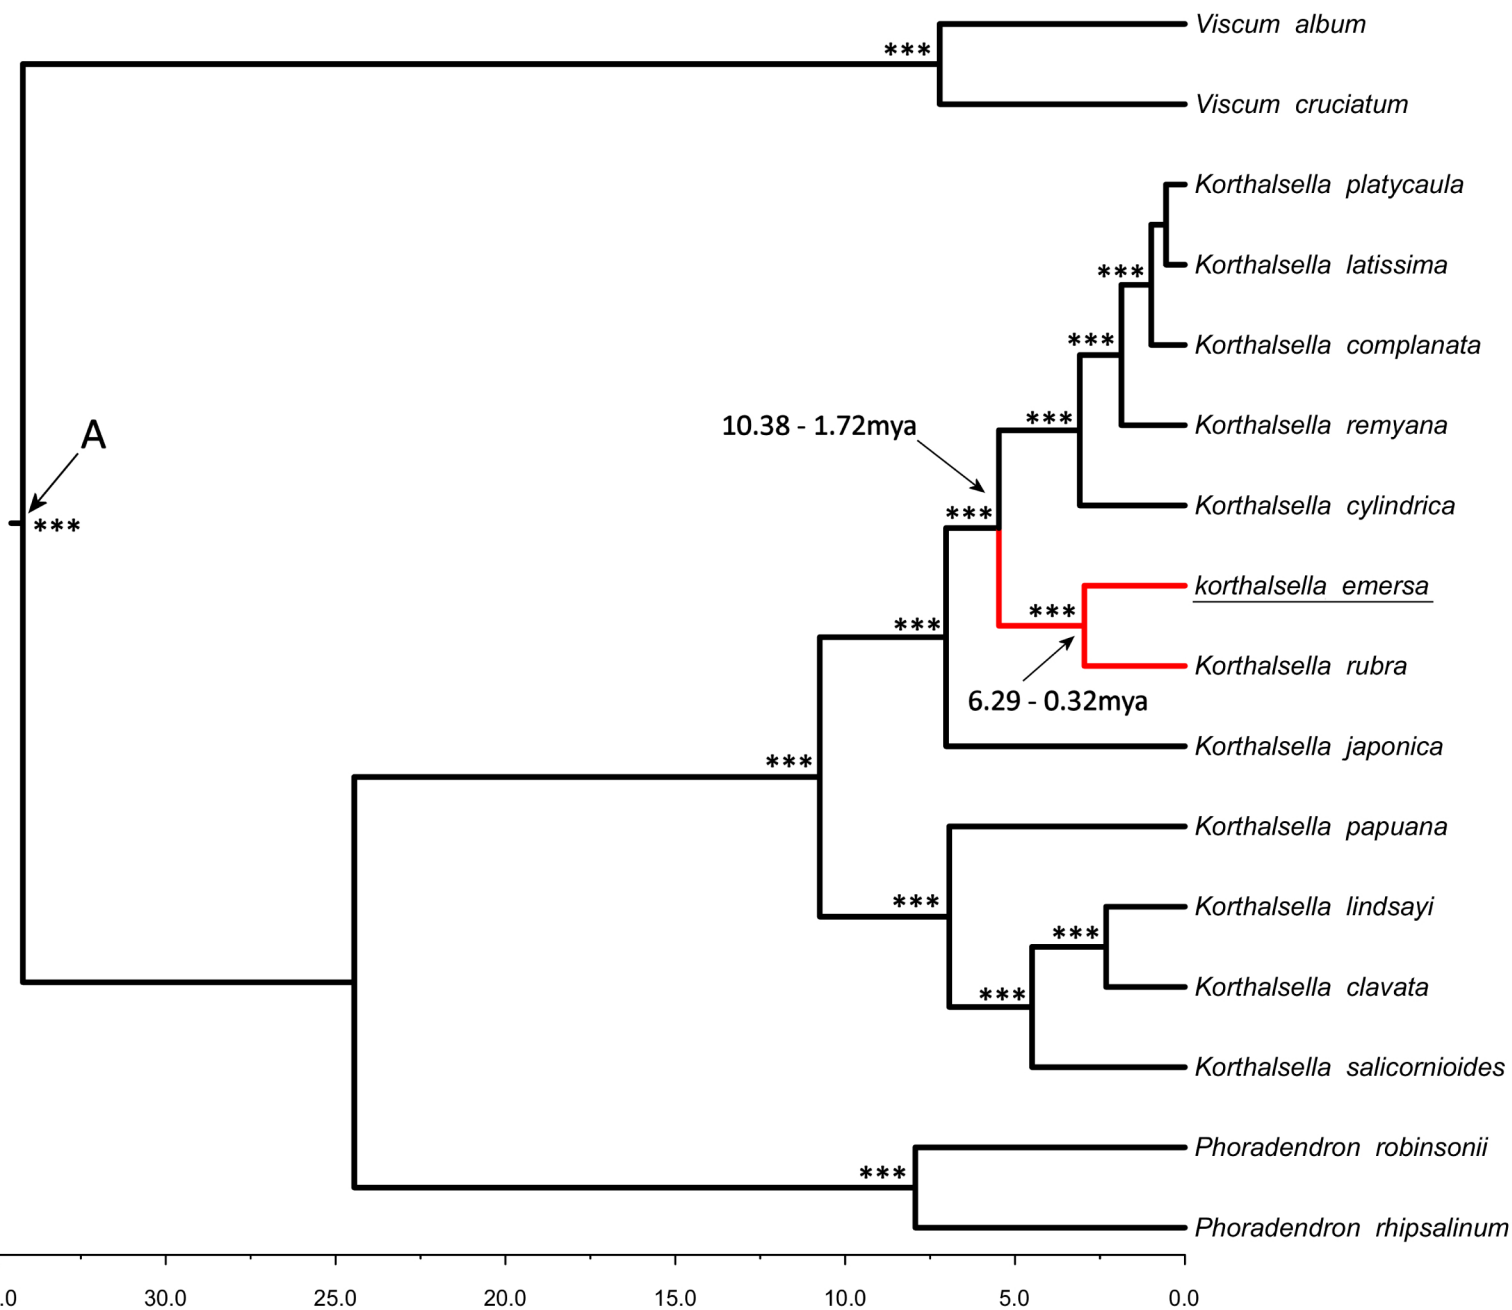

Figure S23. *Korthalsella* Bayesian phylogenetic reconstruction

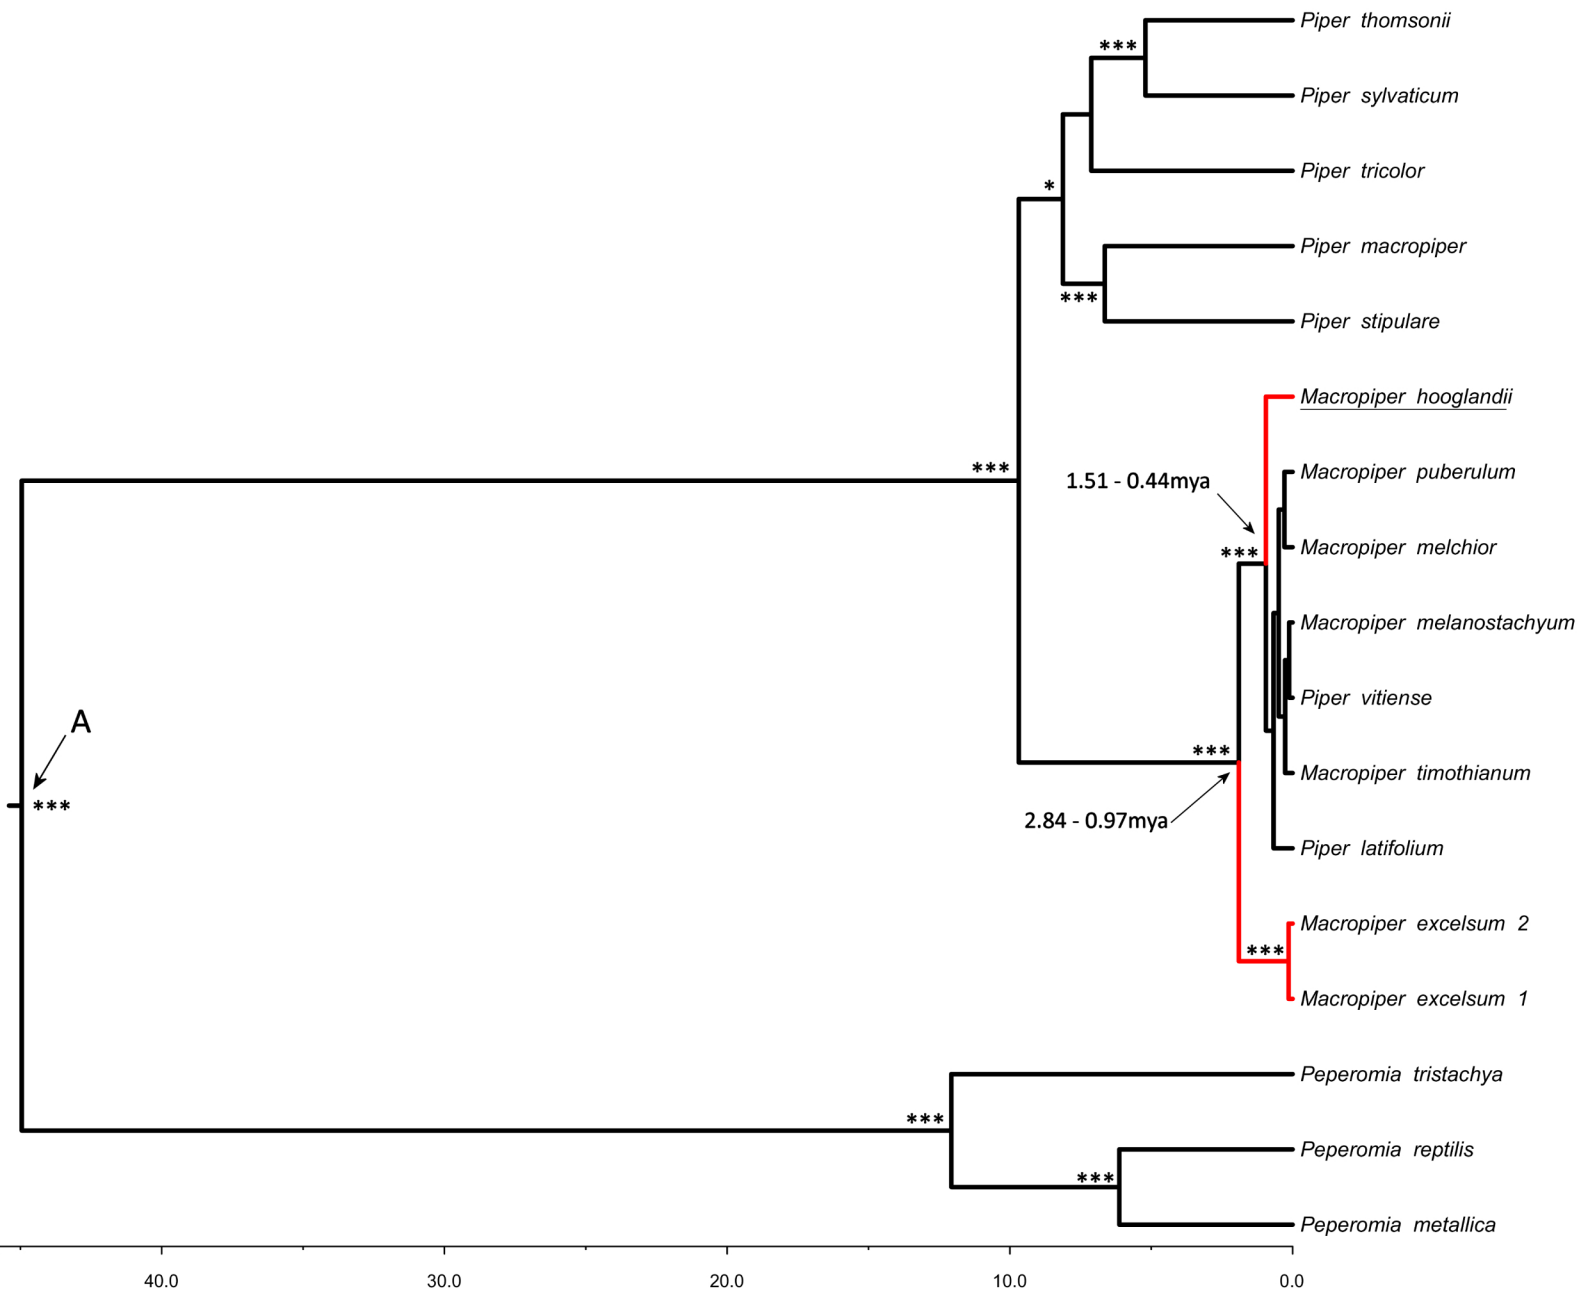

Figure S24. *Macropiper* Bayesian phylogenetic reconstruction

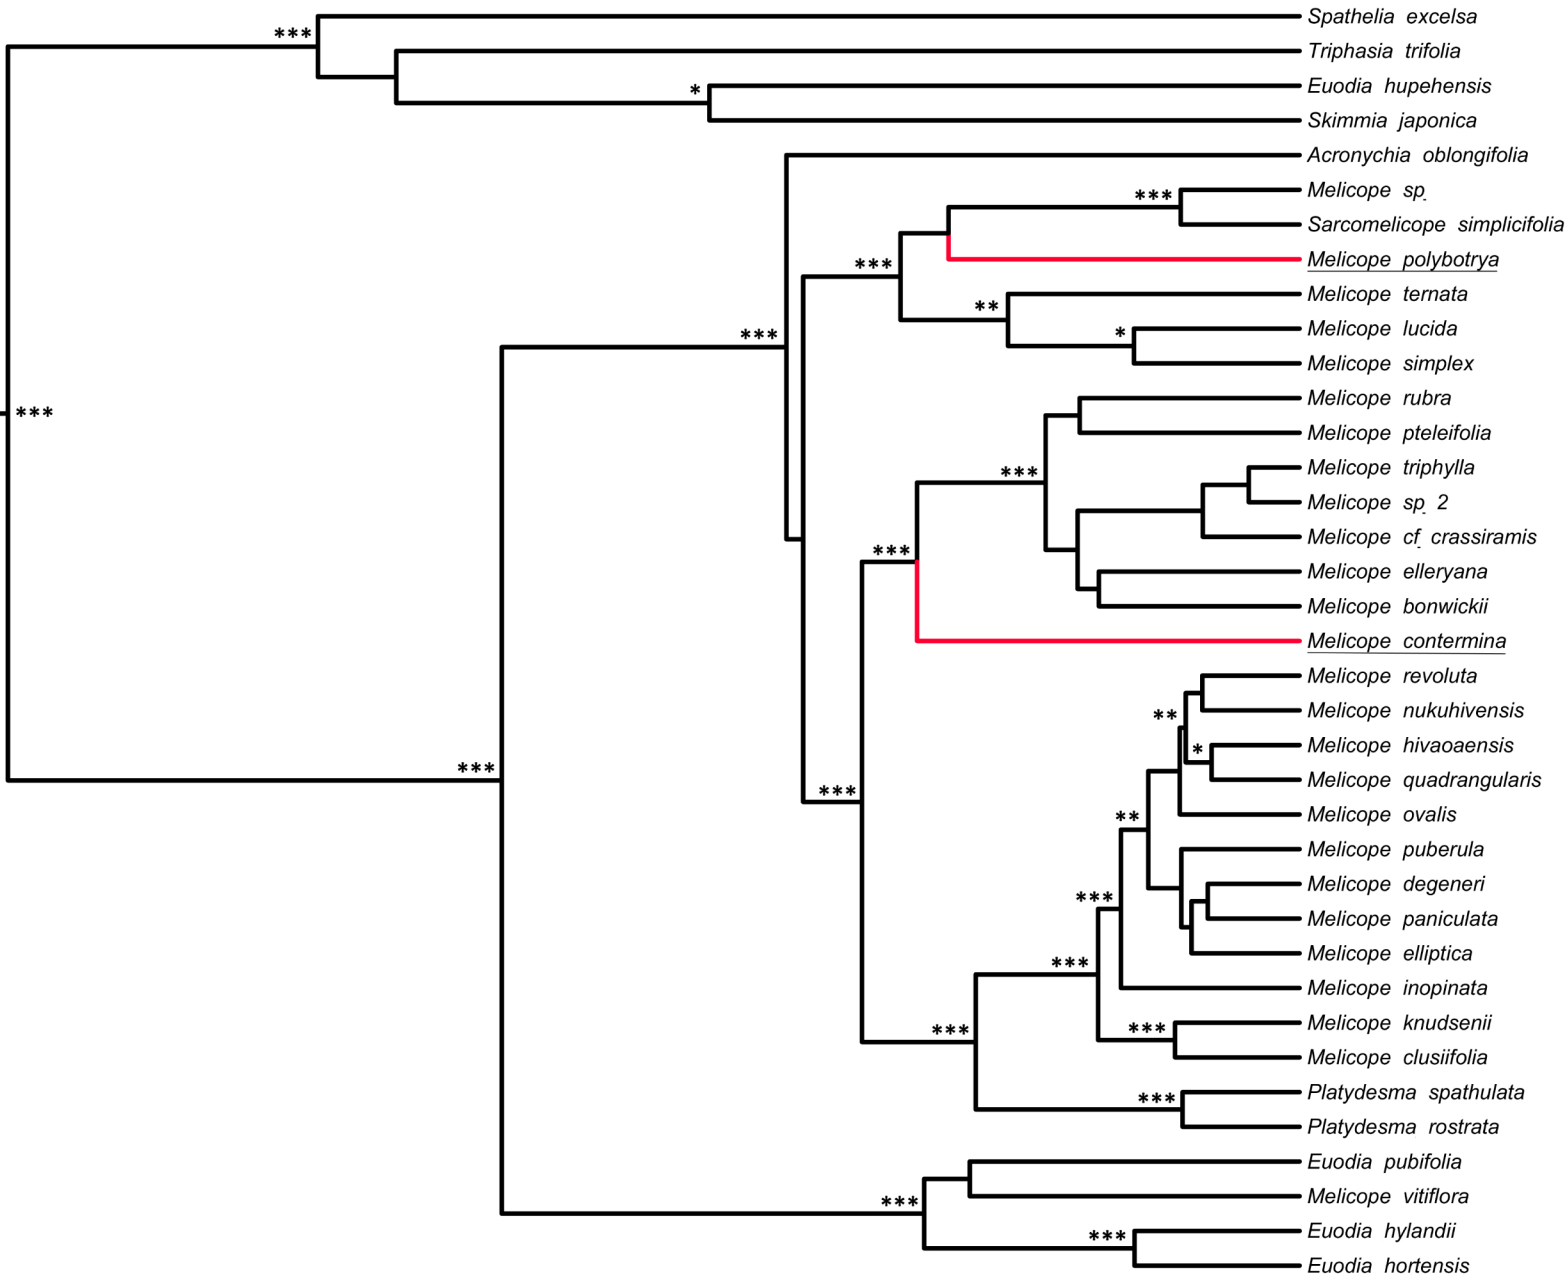

Figure S25. *Melicope* Bayesian phylogenetic reconstruction



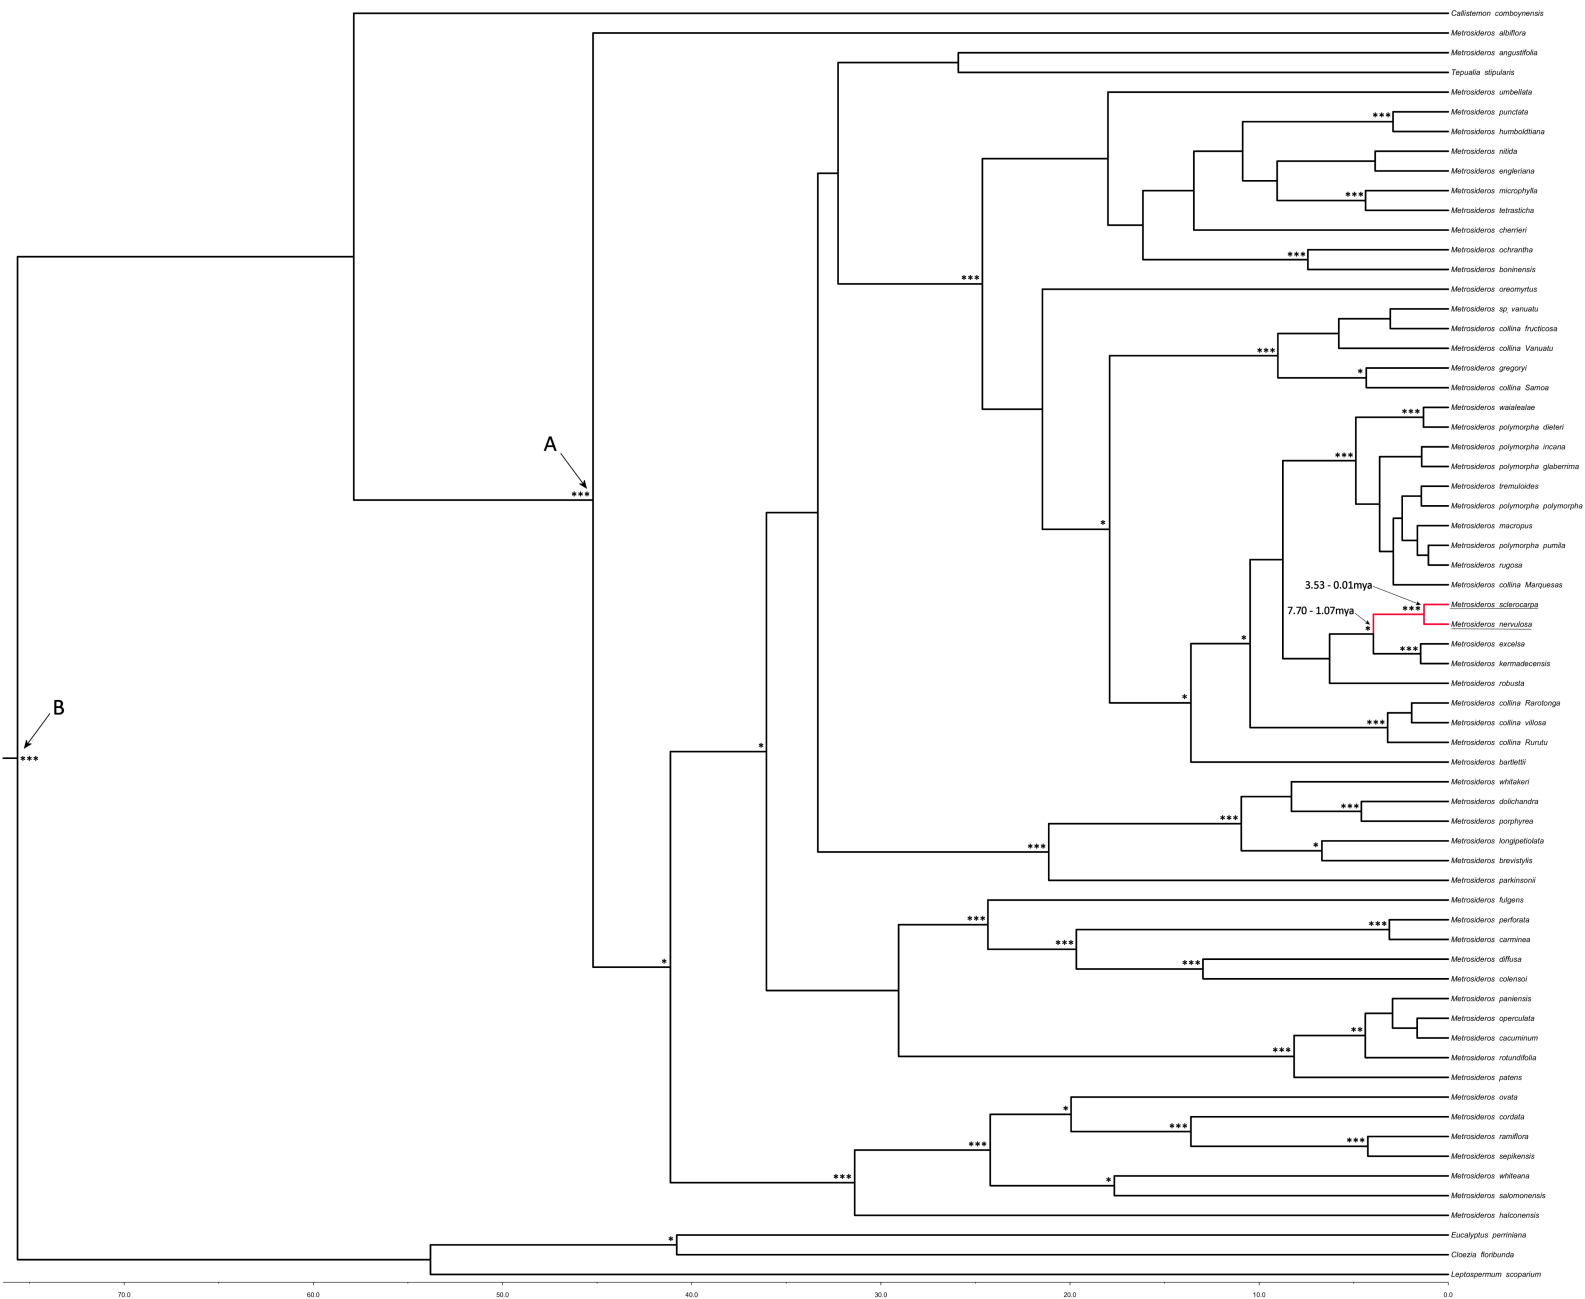

Figure S26. *Metrosideros* Bayesian phylogenetic reconstruction

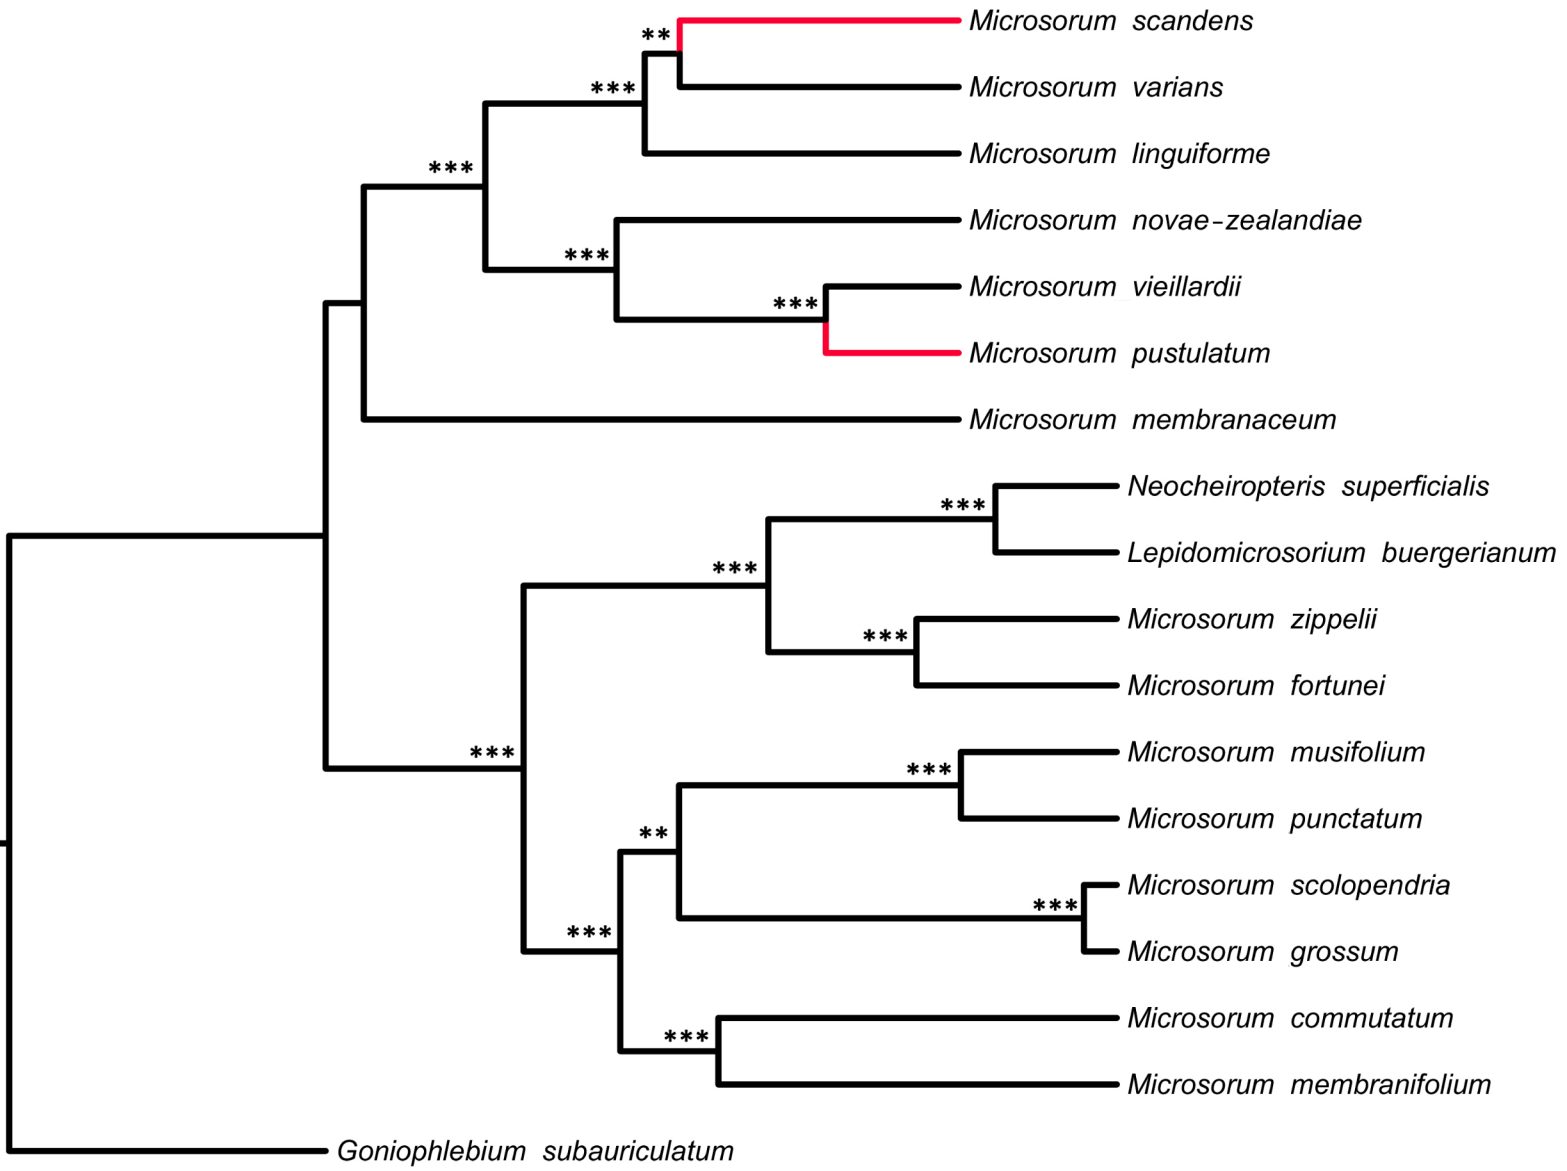

Figure S27. *Microsorium* Bayesian phylogenetic reconstruction

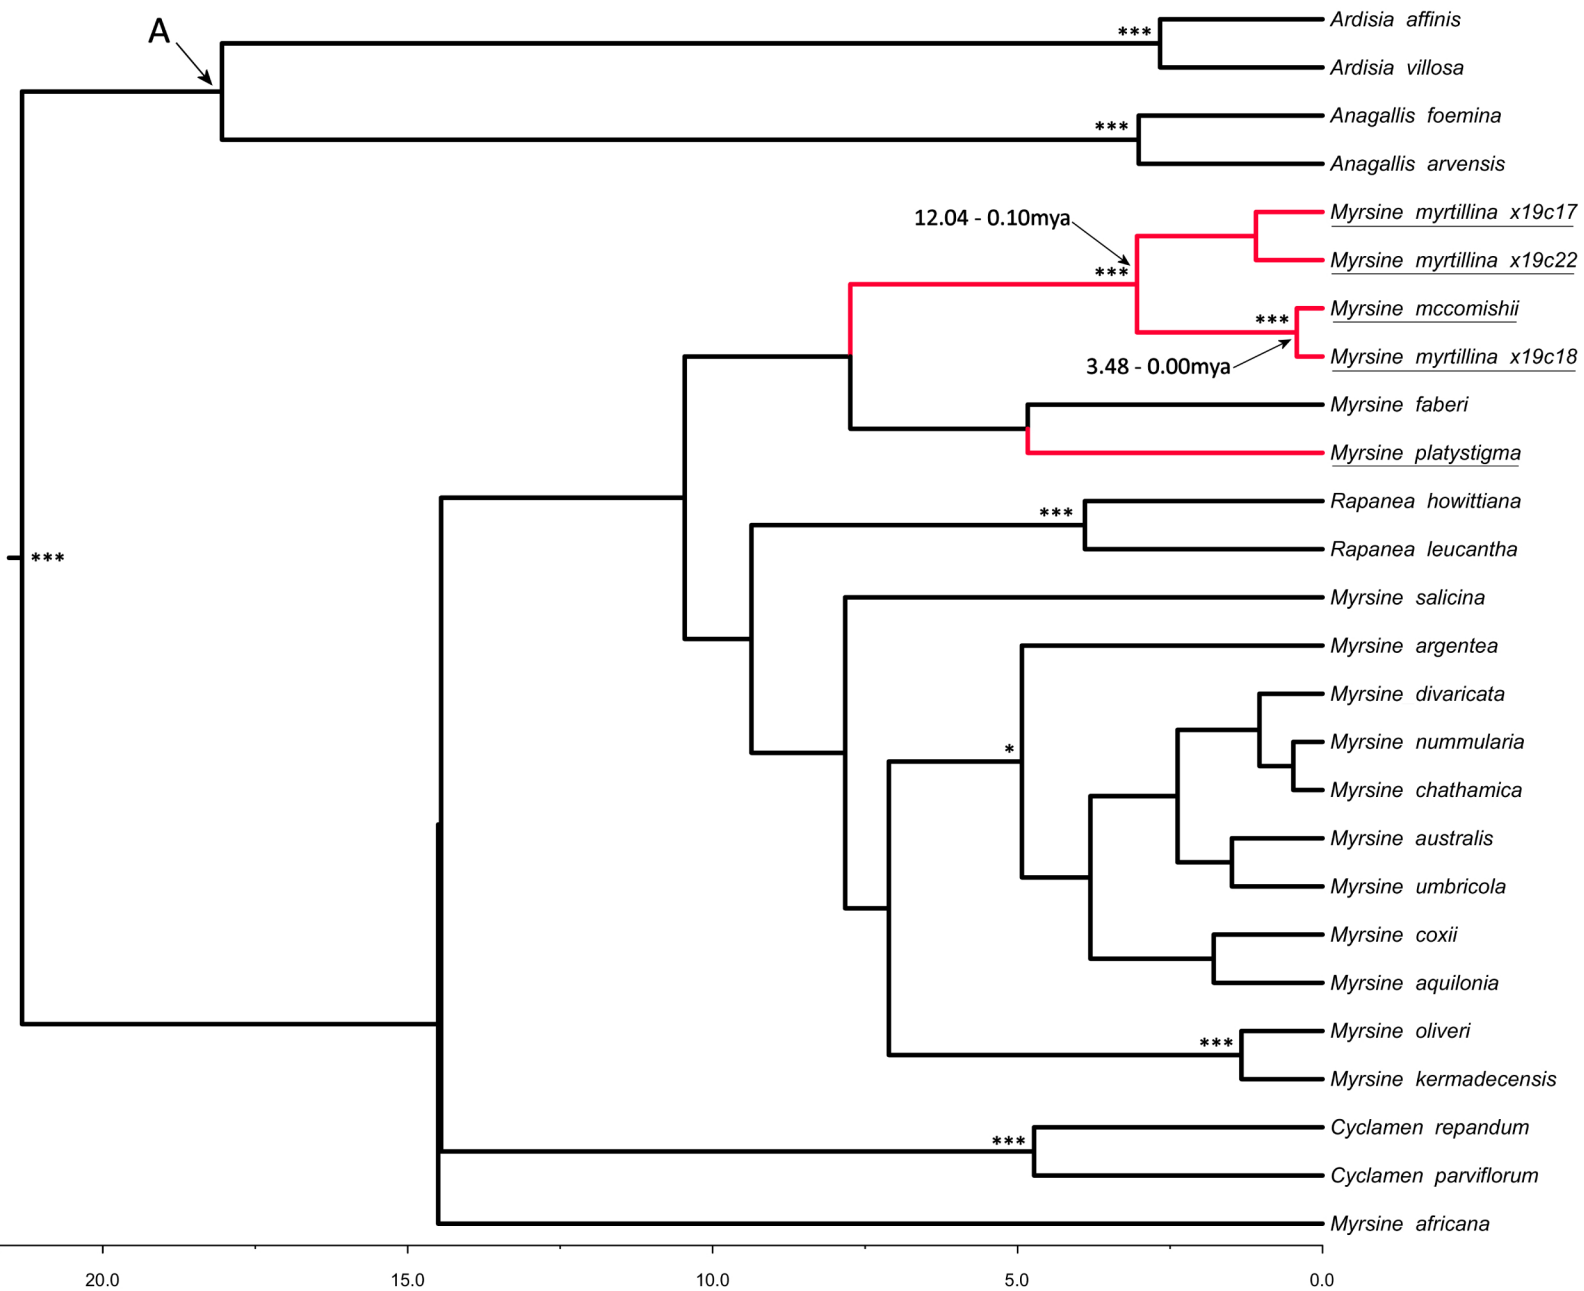

Figure S28. *Myrsine* Bayesian phylogenetic reconstruction

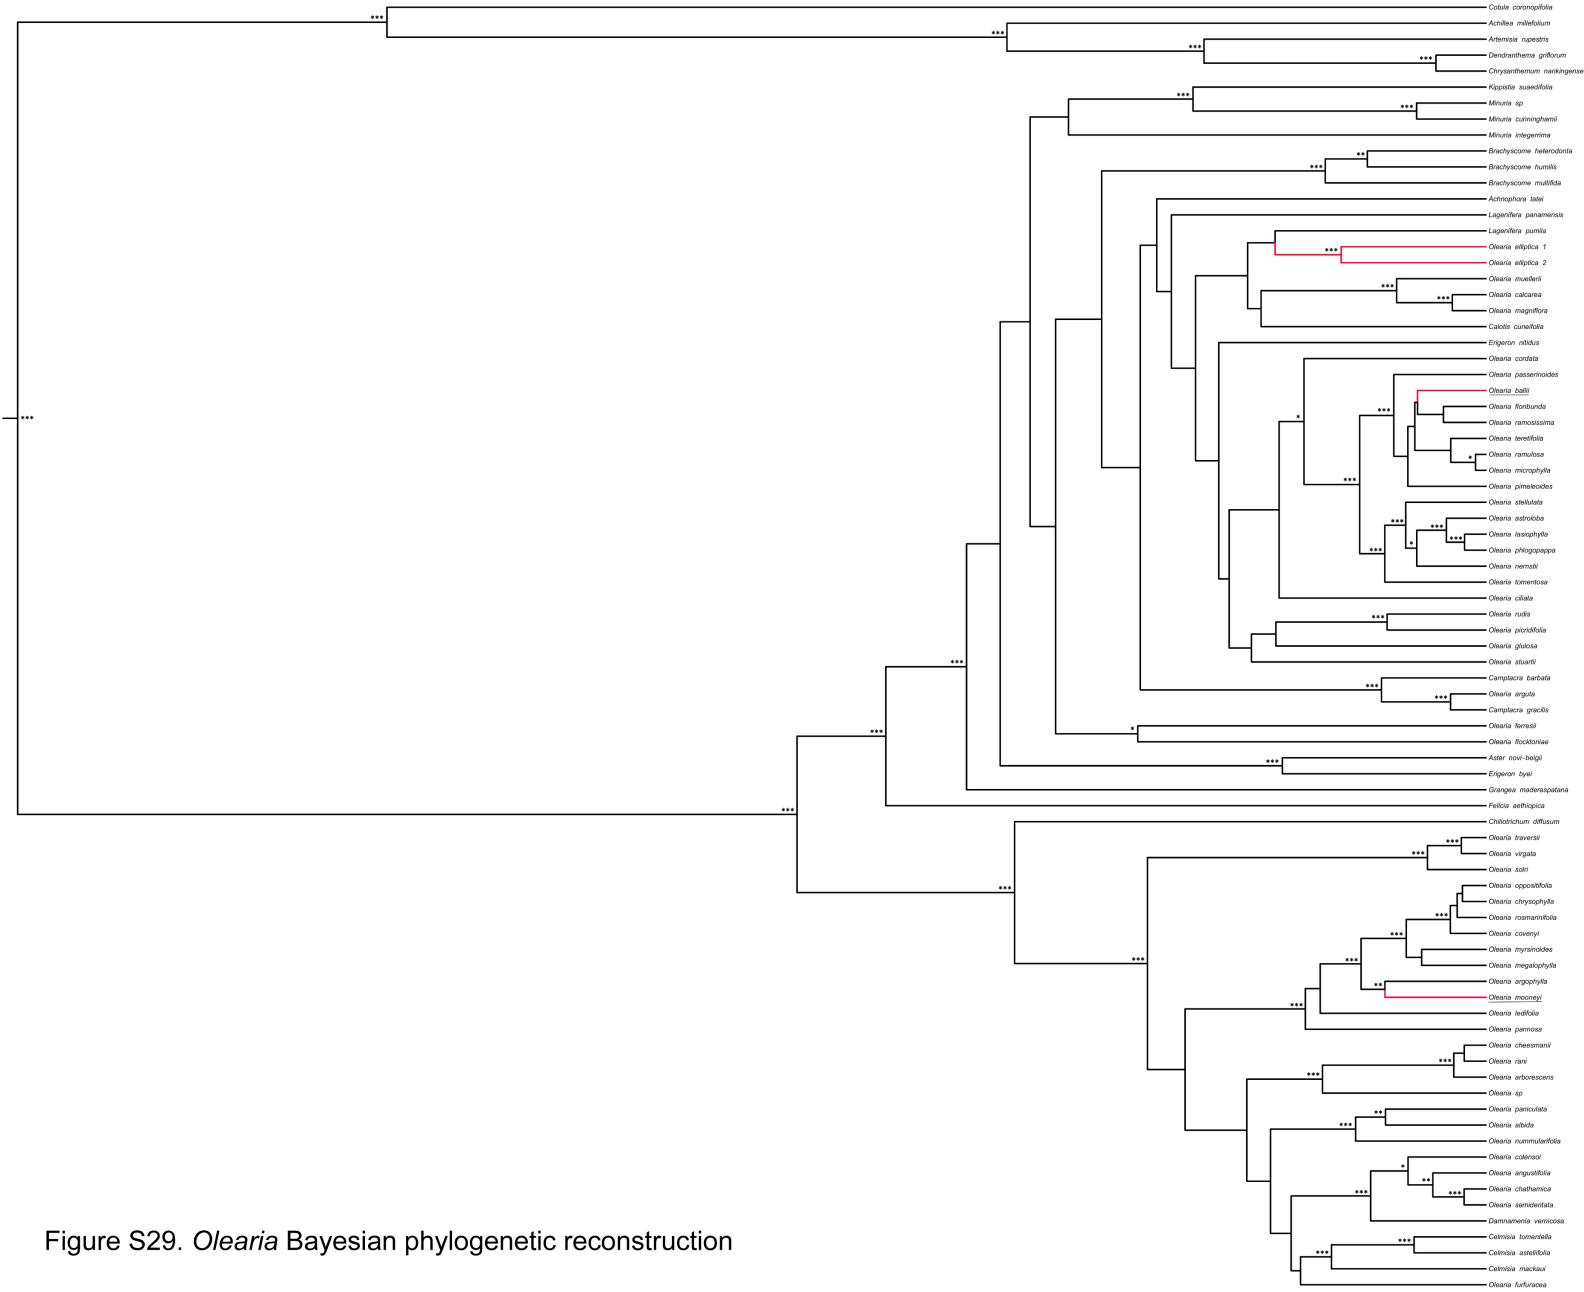

Figure S29. *Olearia* Bayesian phylogenetic reconstruction

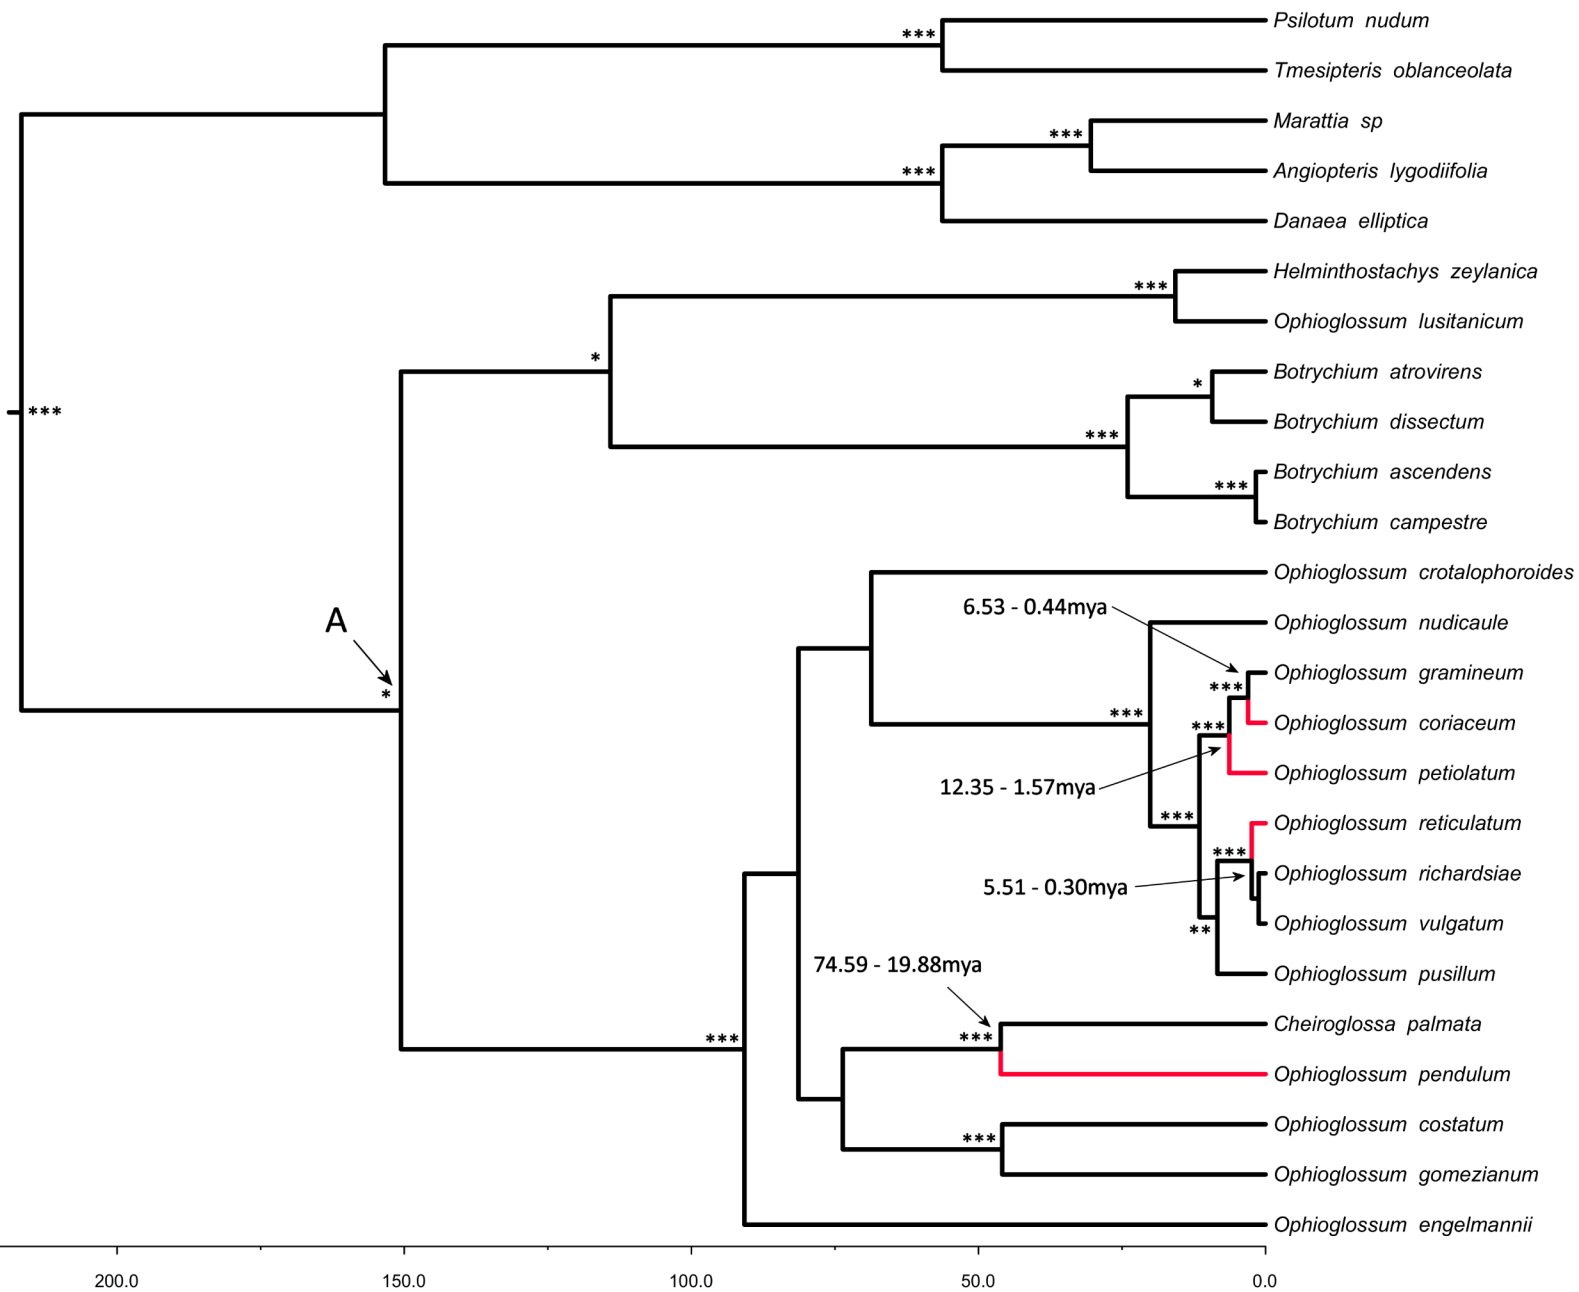

Figure S30. *Ophioglossum* Bayesian phylogenetic reconstruction

Figure S31. *Paspalum* Bayesian phylogenetic reconstruction

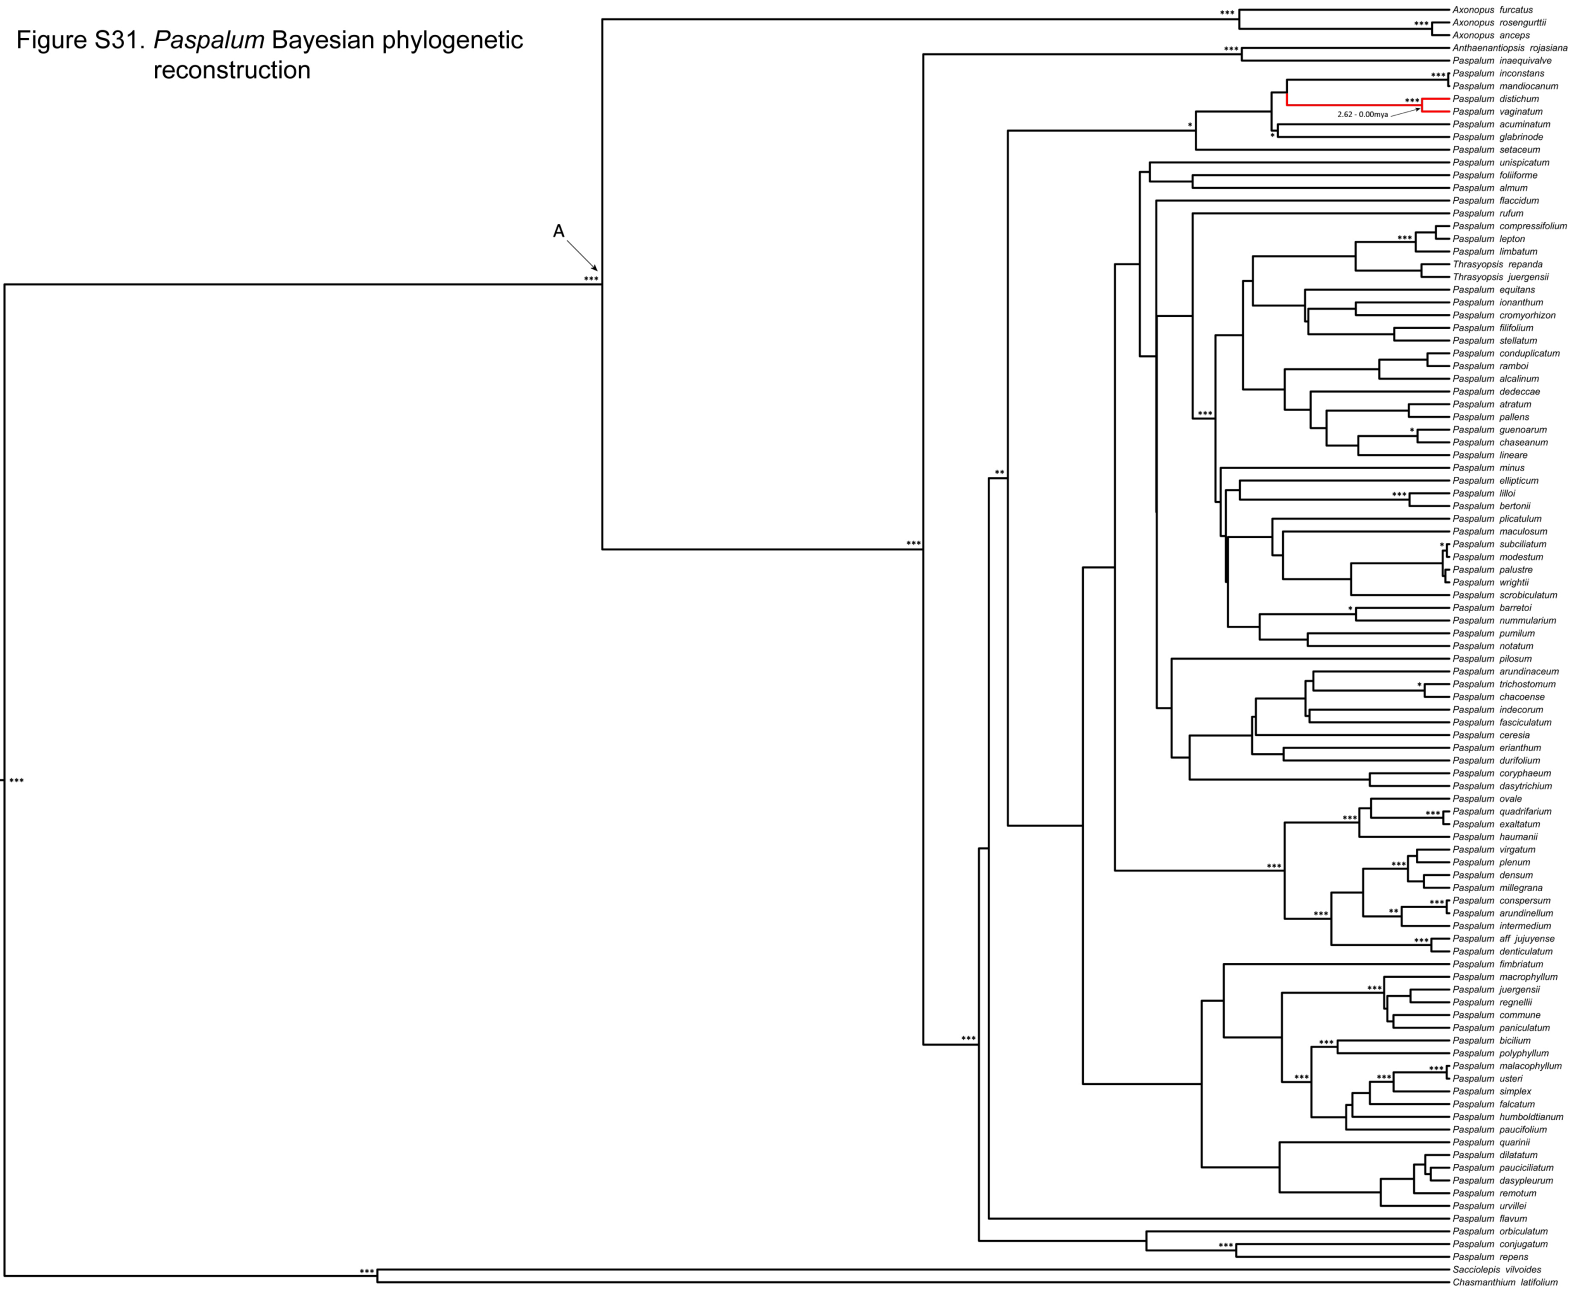

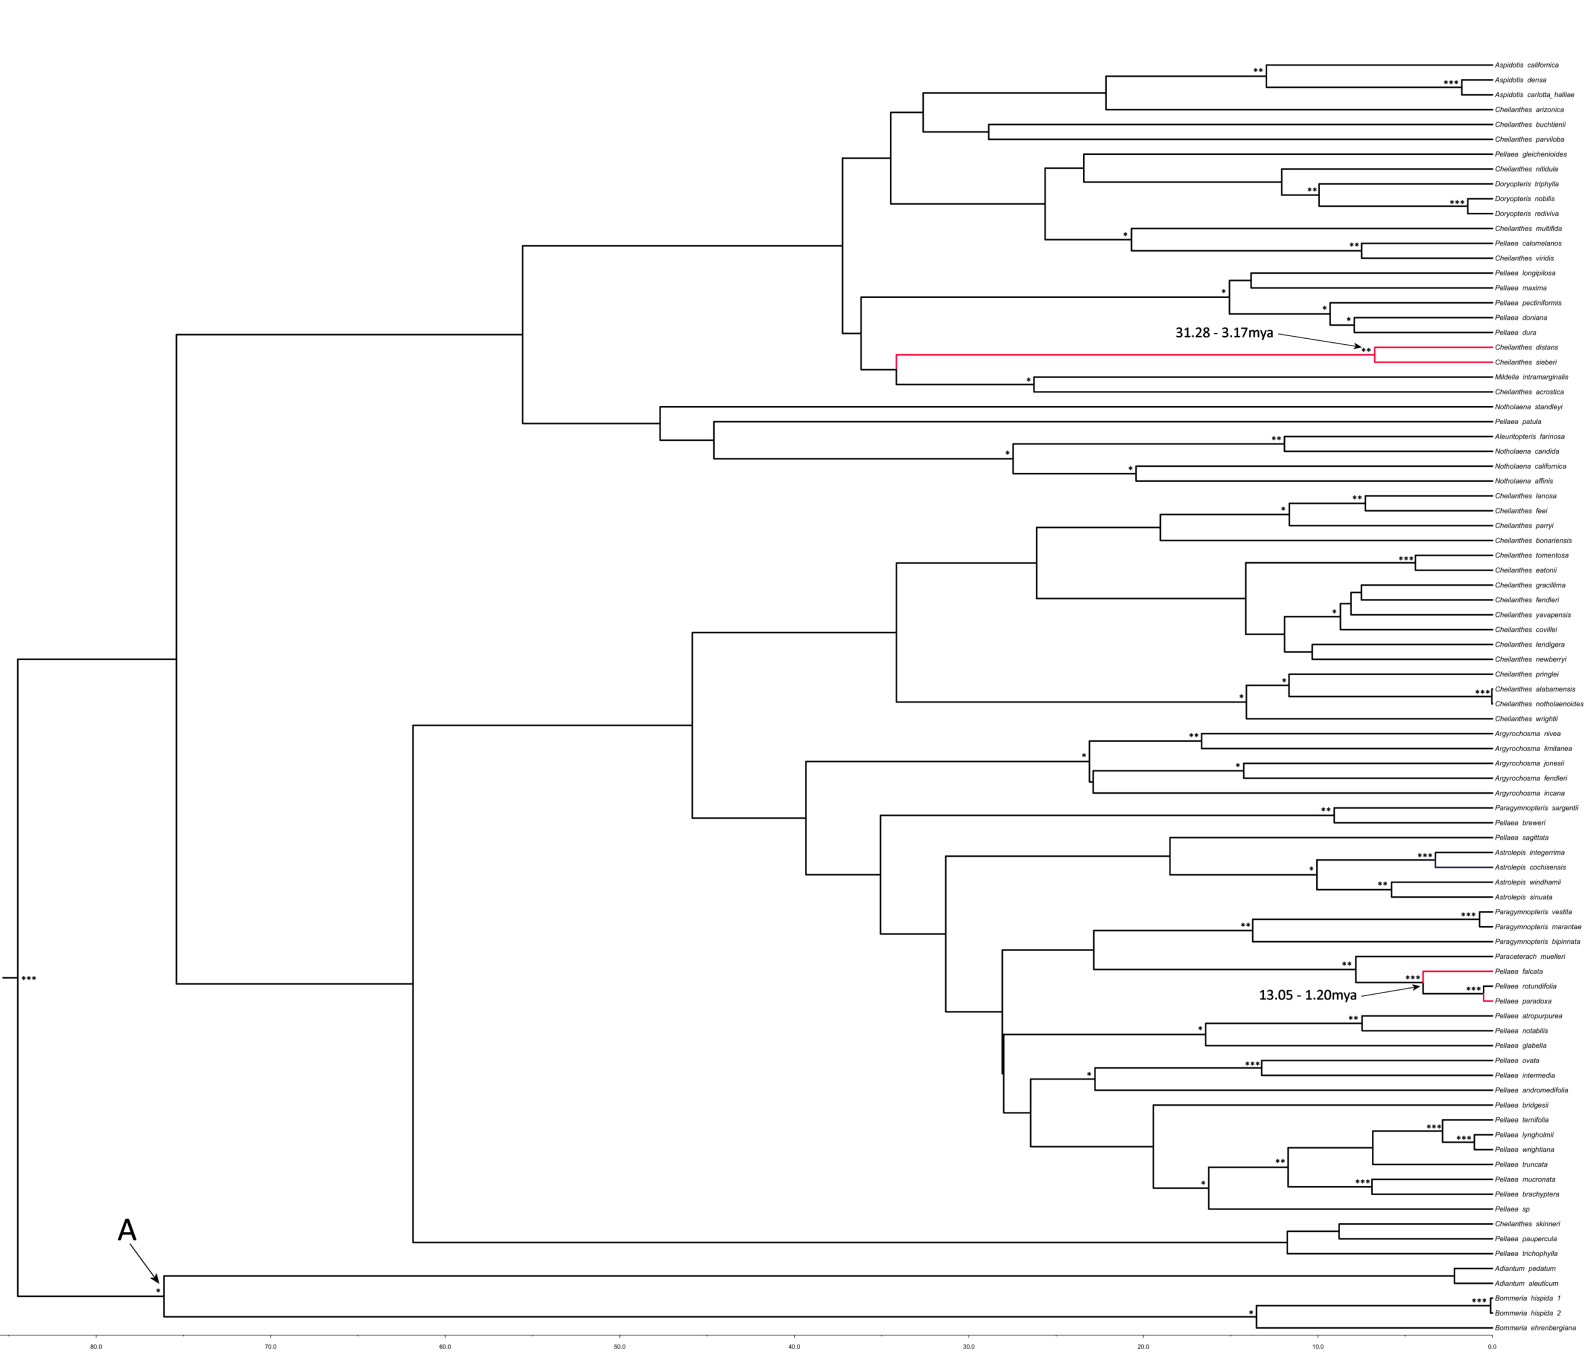

Figure S32. *Pellaea* & *Cheilanthes* Bayesian phylogenetic reconstruction

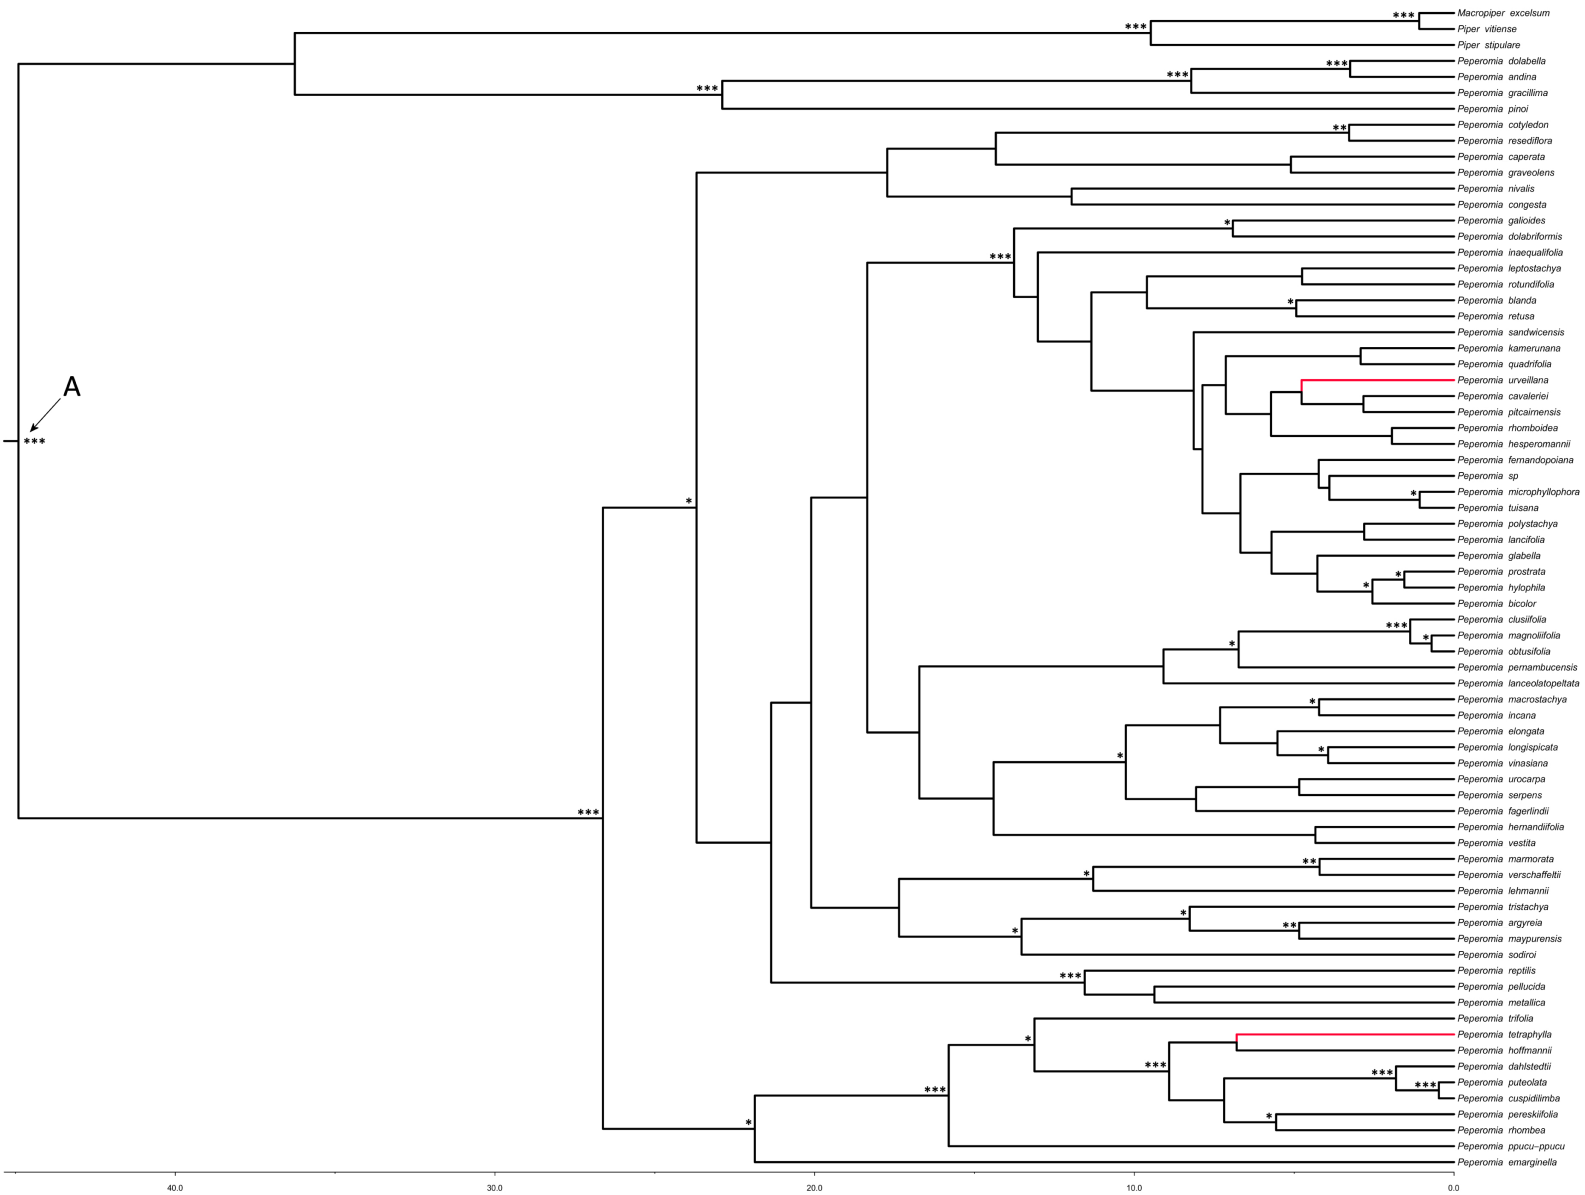

Figure S33. *Peperomia* Bayesian phylogenetic reconstruction



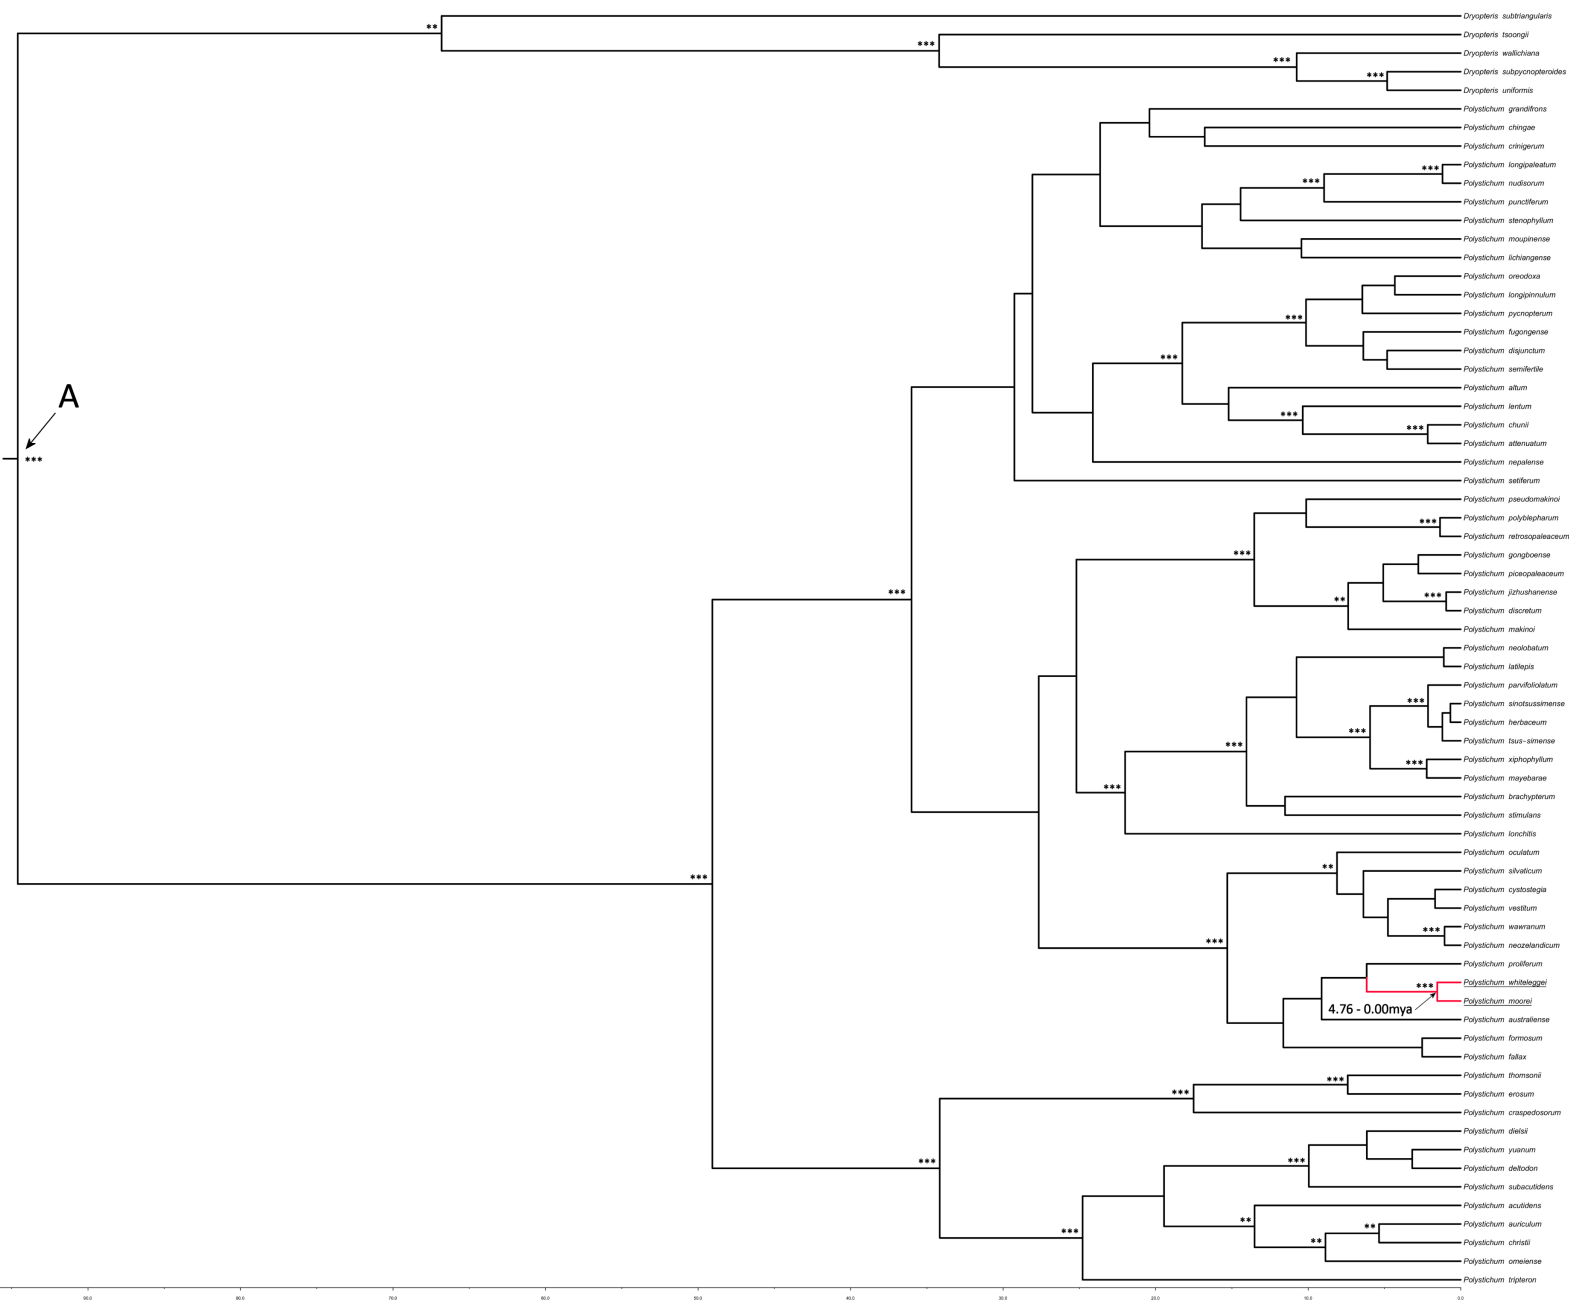

Figure S34. *Polystichum* Bayesian phylogenetic reconstruction

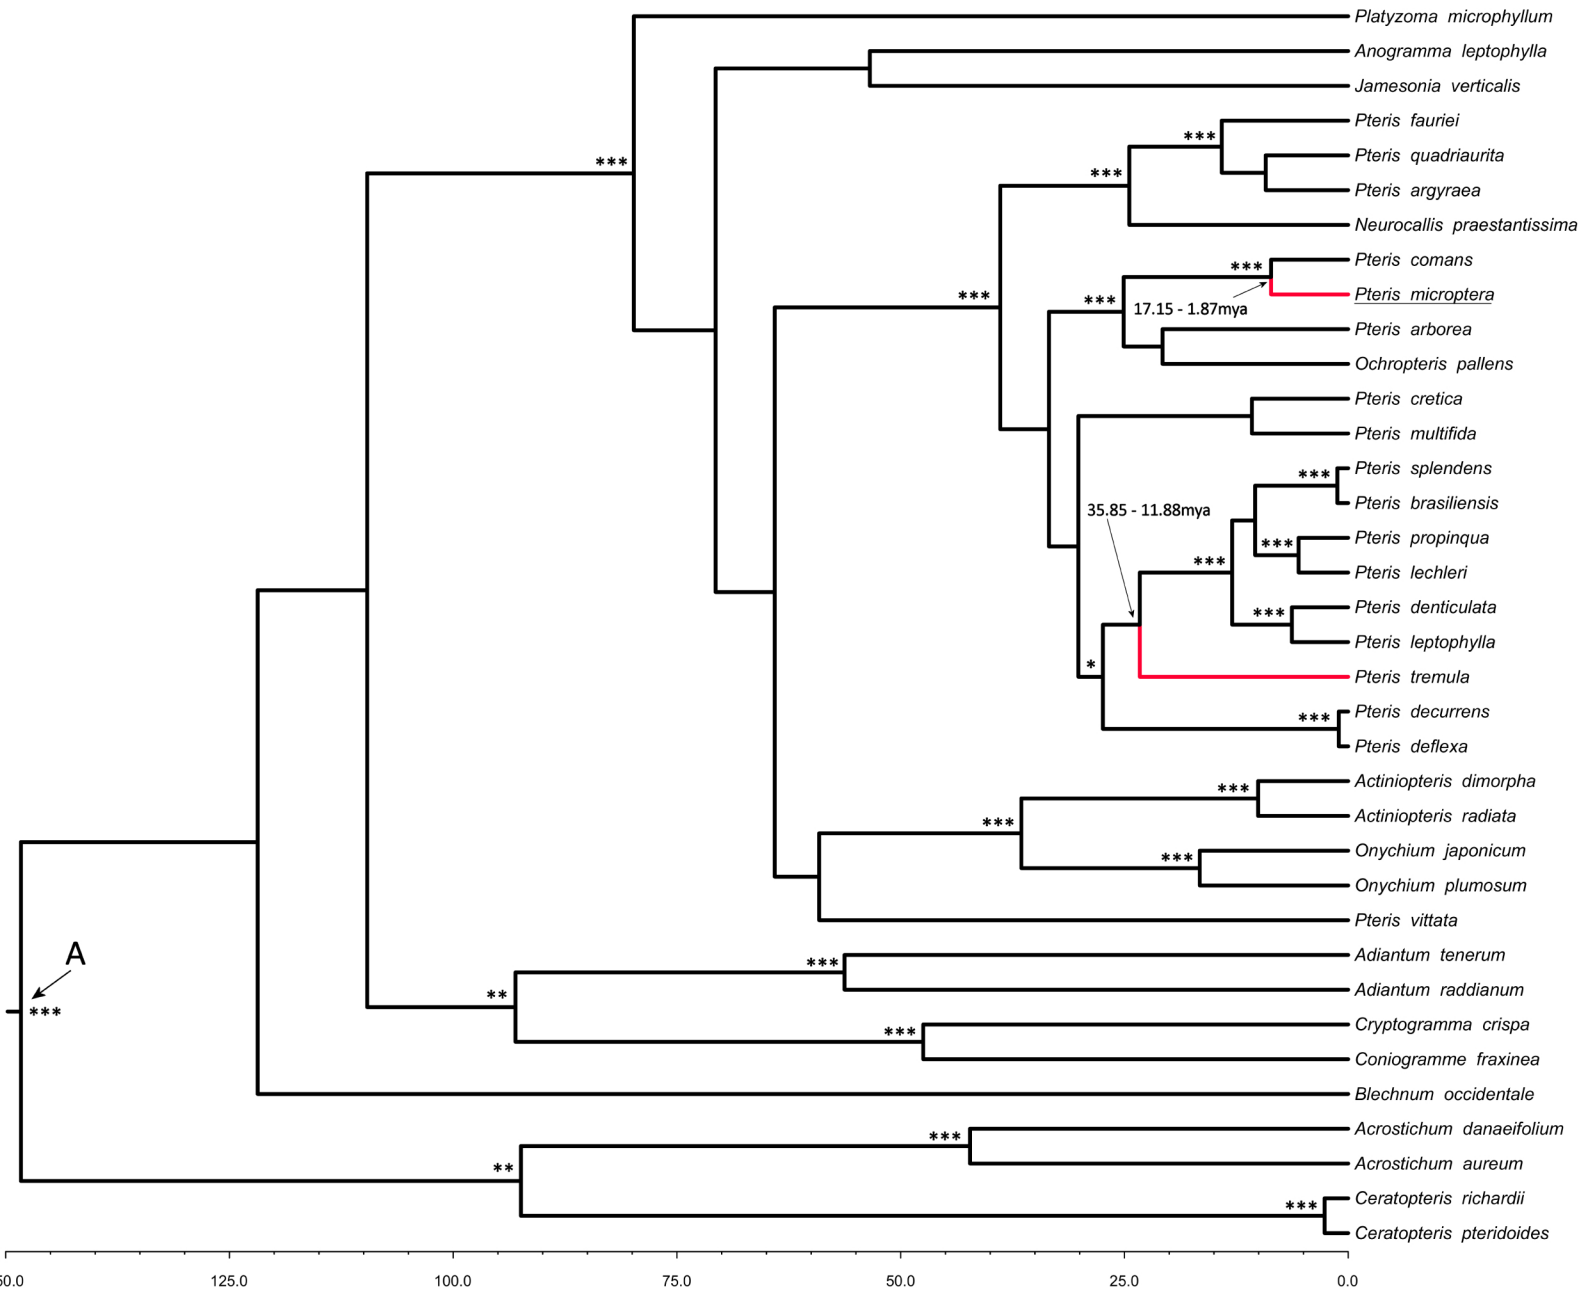

Figure S35. *Pteris* Bayesian phylogenetic reconstruction



Figure S37. *Rytidosperma* Bayesian phylogenetic reconstruction

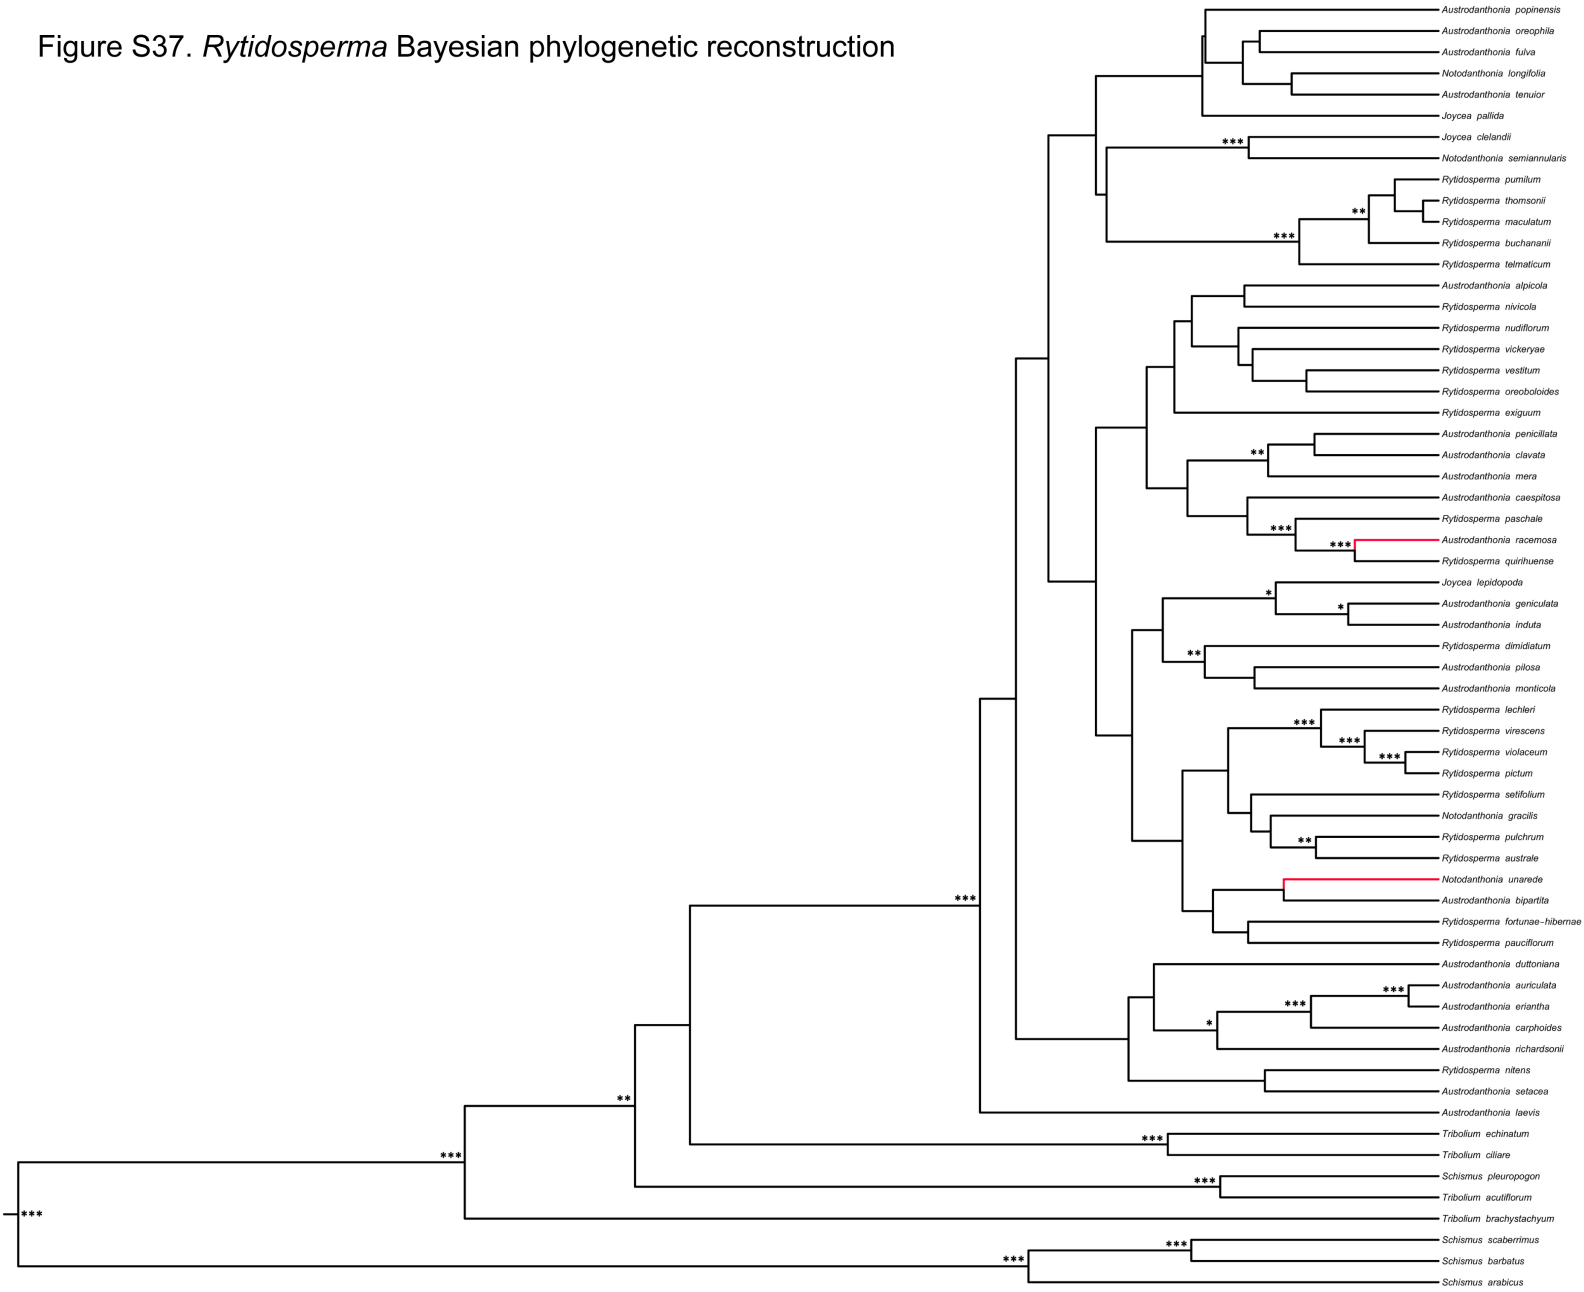

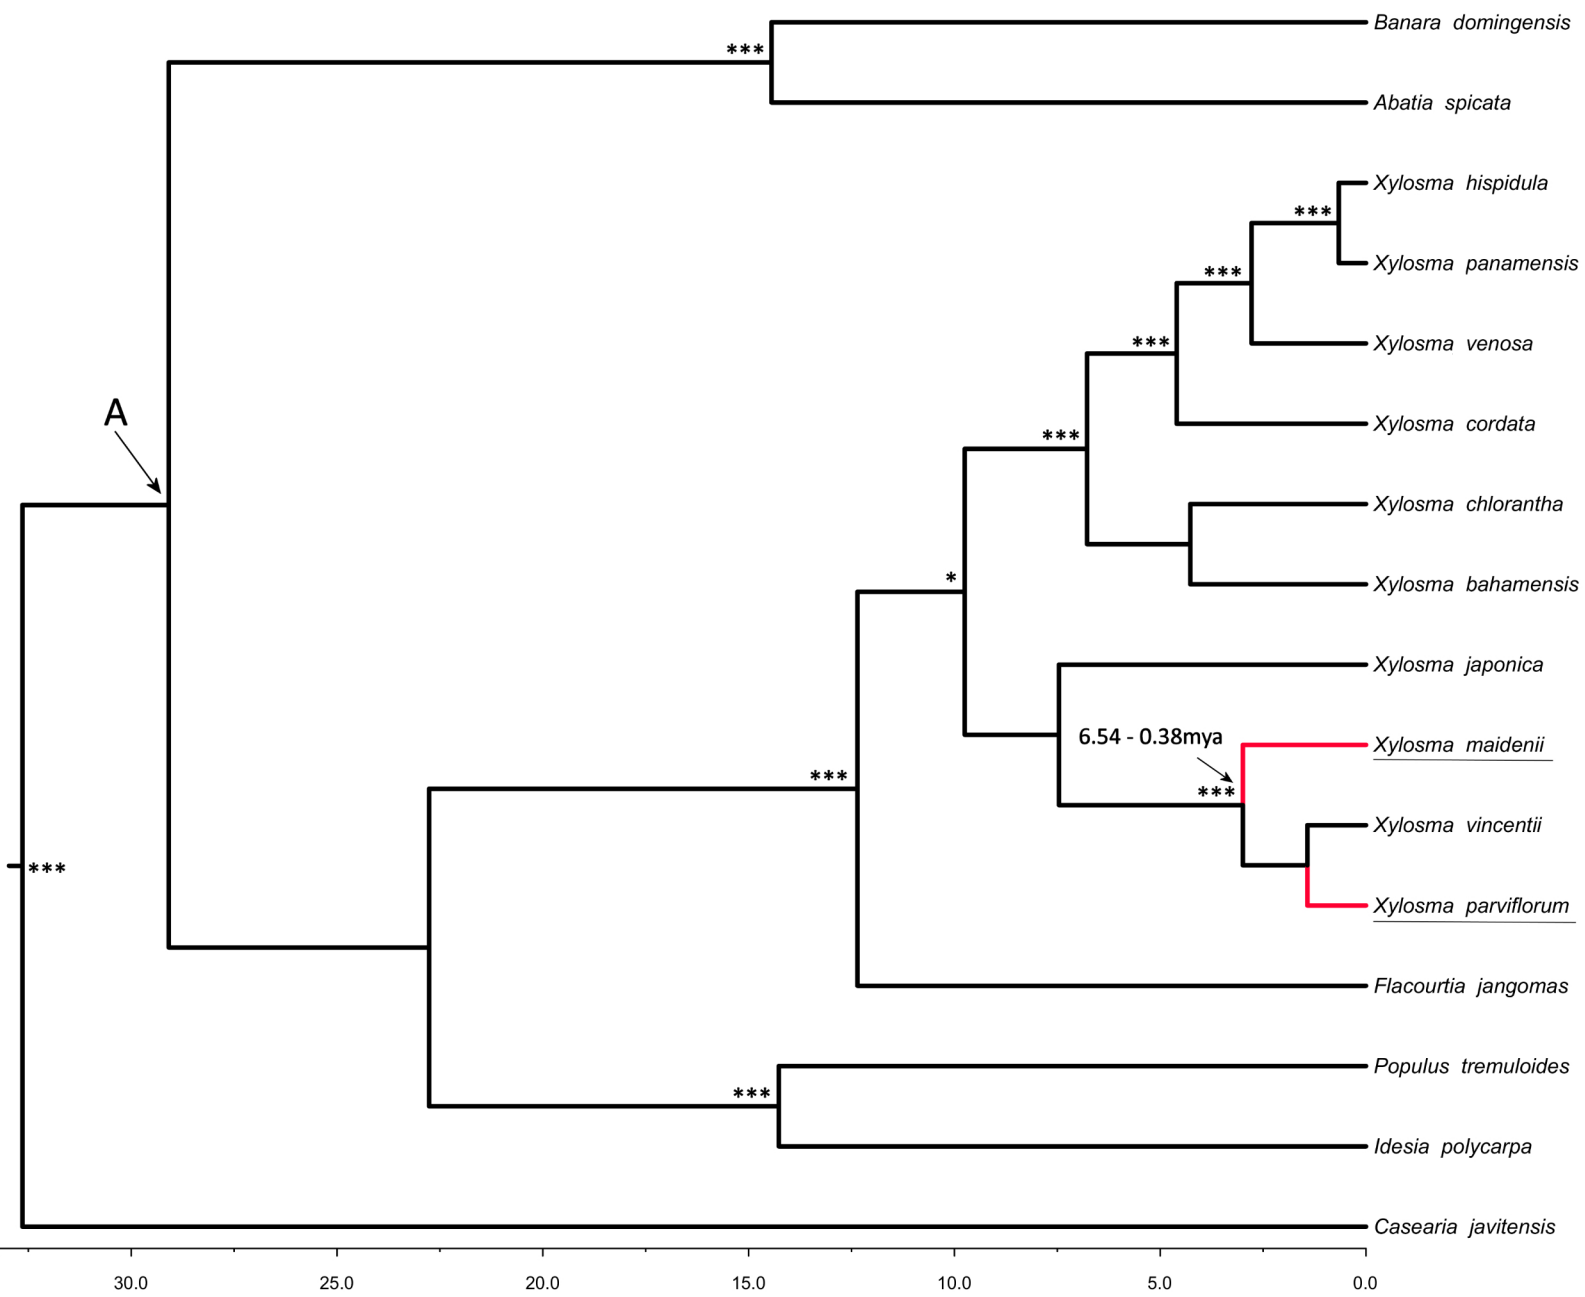

Figure S38. *Xylosma* Bayesian phylogenetic reconstruction

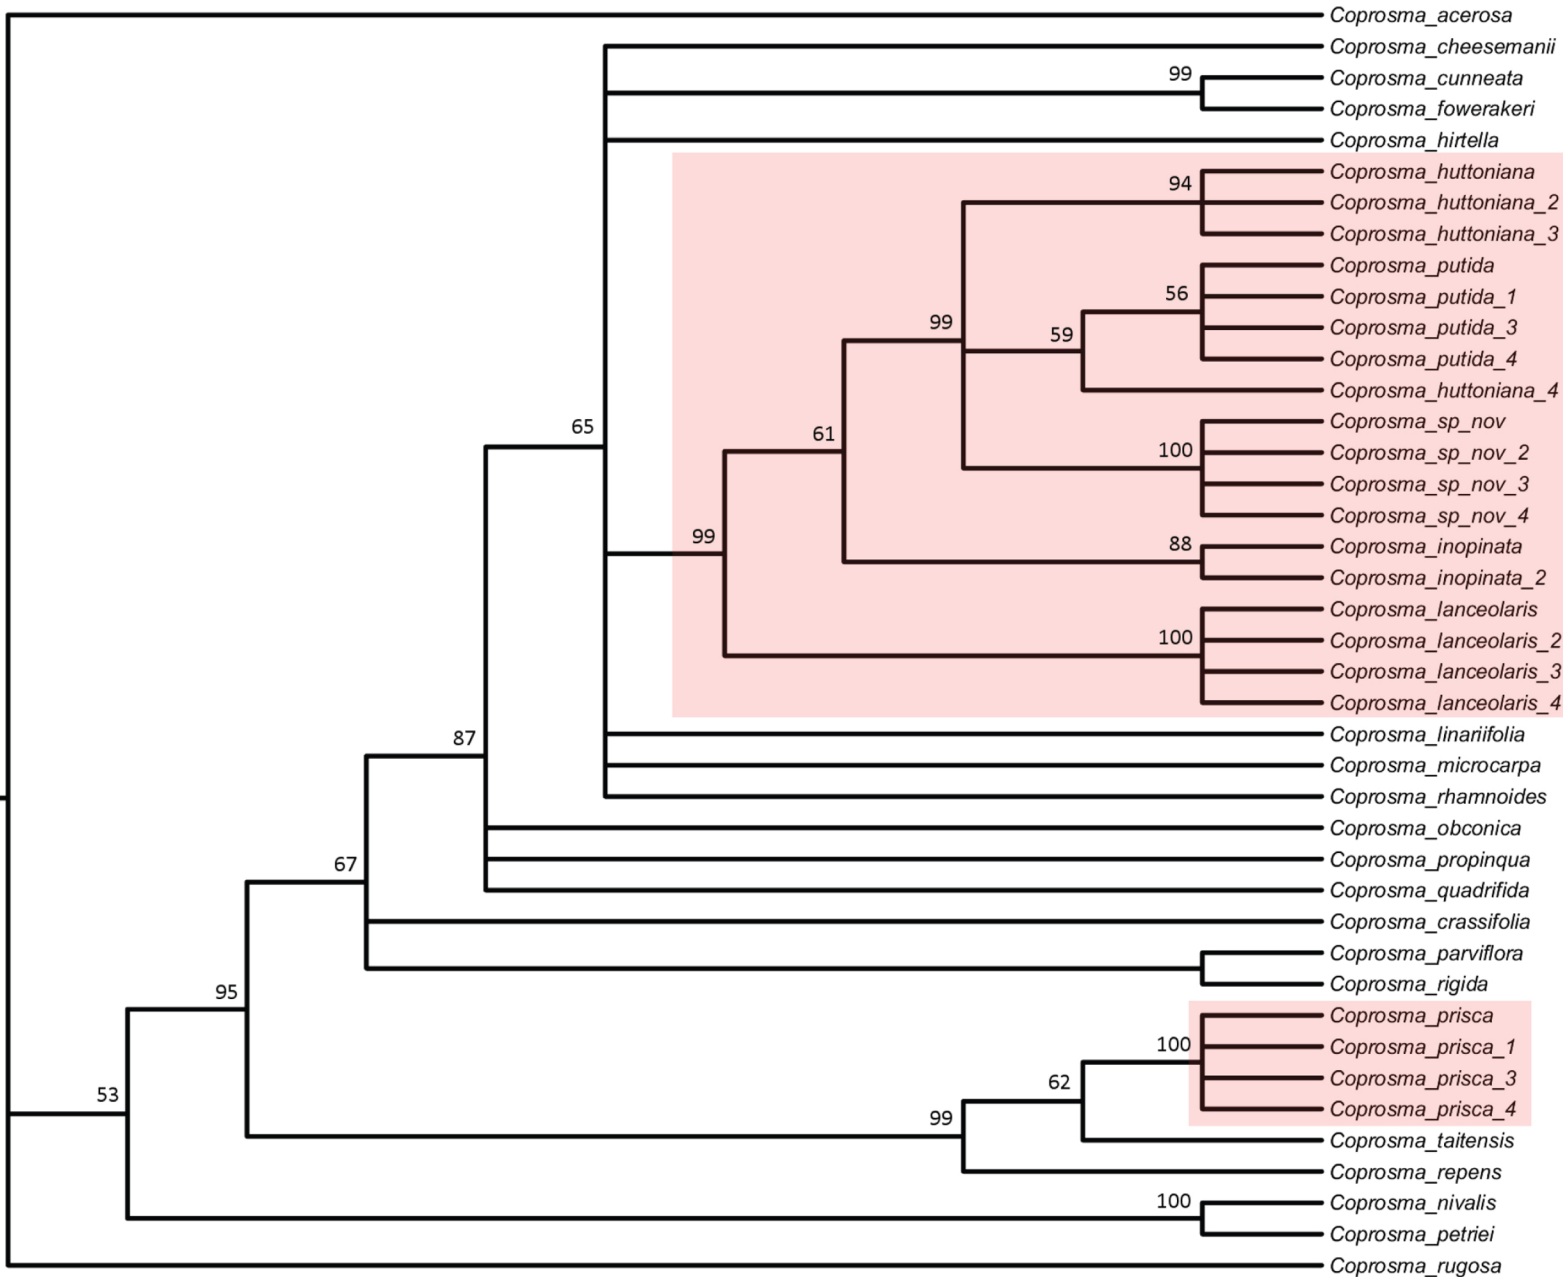

Figure S39. *Coprosma* maximum parsimony phylogenetic reconstruction

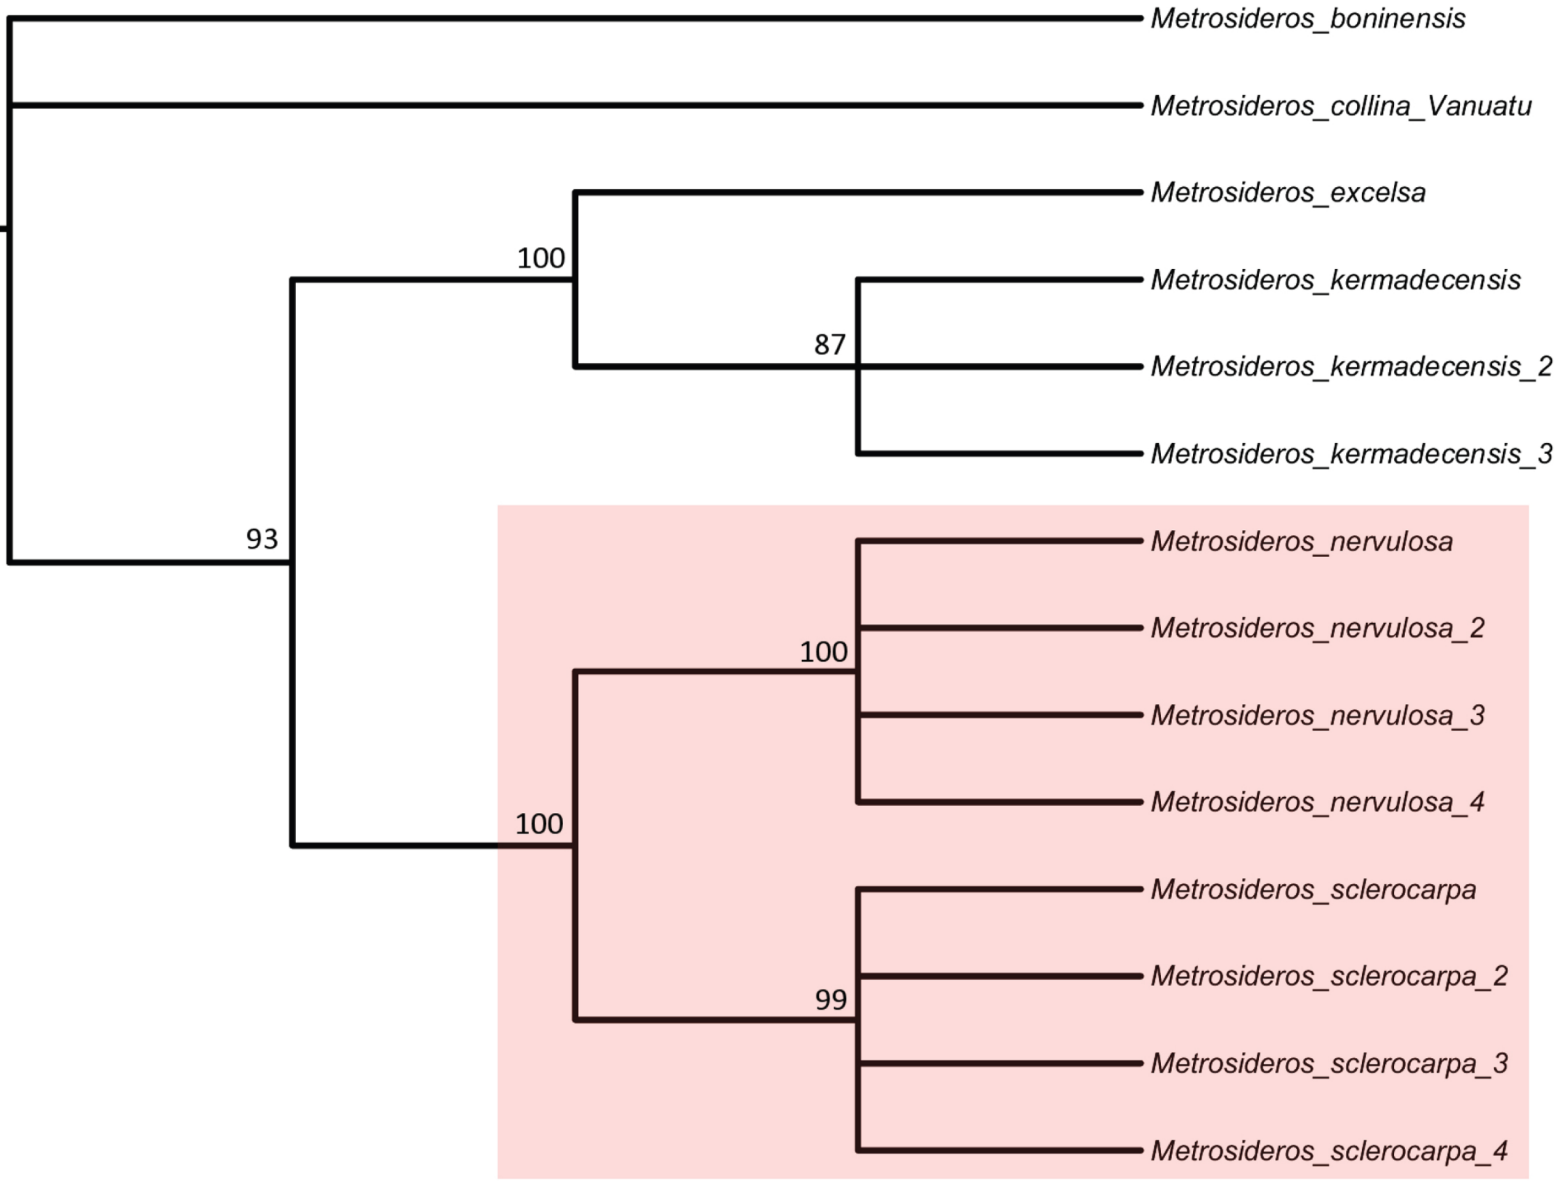

Figure S40. *Metrosideros* maximum parsimony phylogenetic reconstruction

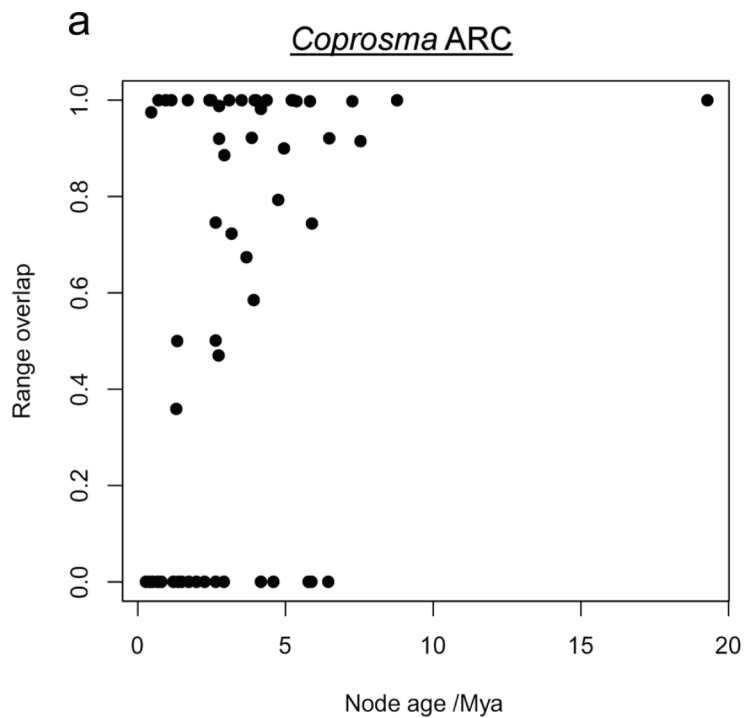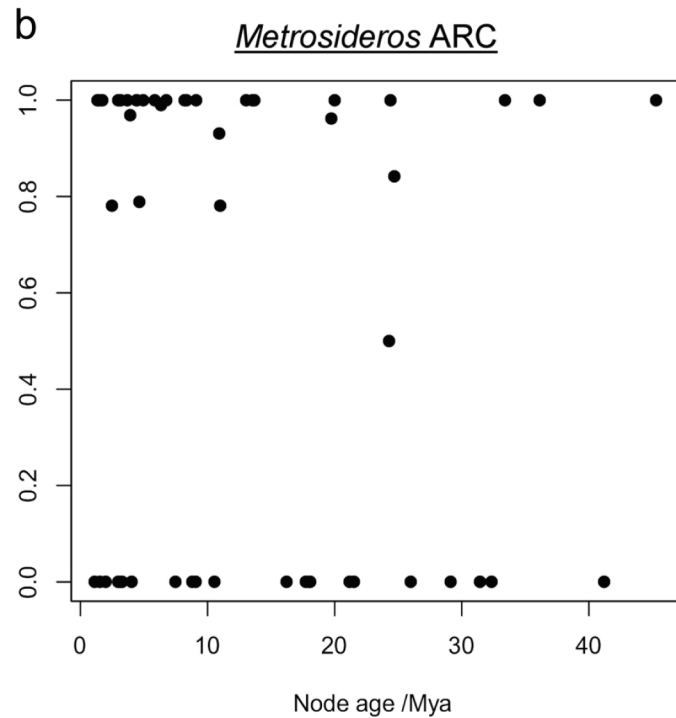

Figure S41. Age-range correlation graphs for (a) *Coprosma* and (b) *Metrosideros*



**Table S1** Number of species within each genus on LHI and each of the 5 focal regions. Values in brackets are the number of local species included in phylogenetic analysis.

| Genus                | LHI   | Australia | New Zealand | New Caledonia | Norfolk Island | Kermadec Islands | Species in region | Regional species sampled | Regional species unavailable | Total species sampled | Proportion of region sampled |
|----------------------|-------|-----------|-------------|---------------|----------------|------------------|-------------------|--------------------------|------------------------------|-----------------------|------------------------------|
| <i>Adiantum</i>      | 3 (3) | 8 (3)     | 6 (2)       | 7 (3)         | 2 (1)          | 3 (1)            | 14                | 4                        | 10                           | 19                    | 0.29                         |
| <i>Alyxia</i>        | 3 (3) | 13 (5)    | 0 (0)       | 31 (0)        | 1 (0)          | 0 (0)            | 44                | 7                        | 37                           | 8                     | 0.16                         |
| <i>Asplenium</i>     | 5 (5) | 30 (17)   | 12 (11)     | 14 (3)        | 4 (4)          | 5 (5)            | 48                | 26                       | 22                           | 41                    | 0.54                         |
| <i>Blechnum</i>      | 5 (4) | 18 (15)   | 14 (12)     | 17 (8)        | 1 (1)          | 2 (2)            | 45                | 31                       | 14                           | 55                    | 0.69                         |
| <i>Calystegia</i>    | 2 (2) | 3 (3)     | 4 (4)       | 0 (0)         | 2 (2)          | 1 (1)            | 5                 | 5                        | 0                            | 17                    | 1.00                         |
| <i>Carex</i>         | 4 (4) | 44 (17)   | 72 (46)     | 6 (2)         | 3 (2)          | 2 (2)            | 118               | 61                       | 57                           | 610                   | 0.52                         |
| <i>Cephalomanes</i>  | 2 (1) | 4 (0)     | 0 (0)       | 0 (0)         | 1 (1)          | 0 (0)            | 5                 | 1                        | 4                            | -                     | 0.20                         |
| <i>Cheilanthes</i>   | 2 (2) | 15 (2)    | 3 (2)       | 4 (2)         | 2 (2)          | 0 (0)            | 16                | 2                        | 14                           | 25                    | 0.13                         |
| <i>Coprosma</i>      | 6 (6) | 10 (8)    | 48 (36)     | 0 (0)         | 2 (2)          | 3 (3)            | 60                | 48                       | 12                           | 60                    | 0.80                         |
| <i>Cryptocarya</i>   | 2 (2) | 47 (4)    | 0 (0)       | 19 (0)        | 0 (0)          | 0 (0)            | 67                | 5                        | 62                           | 9                     | 0.07                         |
| <i>Cyathea</i>       | 4 (4) | 12 (7)    | 5 (4)       | 7 (3)         | 2 (2)          | 2 (0)            | 30                | 18                       | 12                           | 111                   | 0.60                         |
| <i>Dendrobium</i>    | 2 (2) | 19 (9)    | 1 (1)       | 33 (5)        | 1 (0)          | 0 (0)            | 52                | 13                       | 39                           | 26                    | 0.25                         |
| <i>Doodia</i>        | 3 (3) | 8 (5)     | 2 (2)       | 2 (2)         | 2 (2)          | 2 (2)            | 9                 | 6                        | 3                            | 8                     | 0.67                         |
| <i>Geniostoma</i>    | 2 (2) | 1 (1)     | 1 (1)       | 9 (1)         | 0 (0)          | 0 (0)            | 11                | 3                        | 8                            | 5                     | 0.27                         |
| <i>Grammitis</i>     | 3 (3) | 12 (4)    | 5 (3)       | 3 (1)         | 0 (0)          | 0 (0)            | 21                | 10                       | 11                           | 26                    | 0.48                         |
| <i>Hibiscus</i>      | 2 (1) | 35 (-)    | 2 (-)       | 9 (-)         | 1 (-)          | 0 (-)            | 47                | -                        | -                            | -                     | -                            |
| <i>Howea</i>         | 2 (2) | 0 (0)     | 0 (0)       | 0 (0)         | 0 (0)          | 0 (0)            | 2                 | 2                        | 0                            | 2                     | 1.00                         |
| <i>Hymenophyllum</i> | 2 (2) | 19 (8)    | 20 (12)     | 14 (8)        | 0 (0)          | 2 (1)            | 43                | 29                       | 14                           | 58                    | 0.67                         |
| <i>Jasminum</i>      | 2 (1) | 11 (2)    | 0 (0)       | 7 (0)         | 2 (1)          | 0 (0)            | 18                | 2                        | 16                           | -                     | 0.11                         |
| <i>Korthalsella</i>  | 2 (2) | 7 (3)     | 2 (2)       | 2 (1)         | 1 (0)          | 0 (0)            | 11                | 6                        | 5                            | 12                    | 0.55                         |
| <i>Lepidium</i>      | 2 (0) | 35 (20)   | 9 (6)       | 3 (0)         | 0 (0)          | 1 (1)            | 43                | 25                       | 18                           | -                     | 0.58                         |
| <i>Macropiper</i>    | 2 (2) | 0 (0)     | 1 (1)       | 0 (0)         | 1 (1)          | 1 (1)            | 3                 | 3                        | 0                            | 7                     | 1.00                         |
| <i>Marsdenia</i>     | 2 (1) | 33 (0)    | 0 (0)       | 8 (0)         | 0 (0)          | 0 (0)            | 34                | 1                        | 33                           | -                     | 0.03                         |
| <i>Melicope</i>      | 2 (2) | 16 (5)    | 3 (2)       | 13 (1)        | 2 (1)          | 1 (1)            | 35                | 10                       | 25                           | 24                    | 0.29                         |
| <i>Metrosideros</i>  | 2 (2) | 0 (0)     | 11 (11)     | 18 (18)       | 0 (0)          | 1 (1)            | 32                | 32                       | 0                            | 54                    | 1.00                         |
| <i>Microsorium</i>   | 2 (2) | 8 (6)     | 4 (3)       | 1 (1)         | 3 (3)          | 1 (0)            | 11                | 8                        | 3                            | 14                    | 0.73                         |
| <i>Myrsine</i>       | 3 (3) | 20 (1)    | 8 (8)       | 11 (0)        | 0 (0)          | 1 (1)            | 43                | 13                       | 30                           | 18                    | 0.30                         |
| <i>Olearia</i>       | 3 (3) | 47 (24)   | 33 (14)     | 0 (0)         | 0 (0)          | 0 (0)            | 83                | 41                       | 42                           | 64                    | 0.49                         |
| <i>Ophioglossum</i>  | 4 (4) | 7 (5)     | 2 (1)       | 2 (2)         | 1 (1)          | 1 (1)            | 10                | 7                        | 3                            | 14                    | 0.70                         |
| <i>Paspalum</i>      | 2 (2) | 21 (15)   | 0 (0)       | 1 (1)         | 1 (1)          | 1 (1)            | 22                | 15                       | 7                            | 90                    | 0.68                         |
| <i>Pellaea</i>       | 2 (2) | 5 (4)     | 2 (2)       | 1 (1)         | 1 (1)          | 1 (1)            | 6                 | 5                        | 1                            | 29                    | 0.83                         |
| <i>Peperomia</i>     | 2 (2) | 5 (2)     | 2 (2)       | 8 (1)         | 0 (0)          | 2 (2)            | 16                | 4                        | 12                           | 70                    | 0.25                         |
| <i>Polystichum</i>   | 2 (2) | 4 (4)     | 6 (6)       | 0 (0)         | 0 (0)          | 0 (0)            | 12                | 12                       | 0                            | 67                    | 1.00                         |
| <i>Pteris</i>        | 2 (2) | 10 (4)    | 3 (2)       | 8 (2)         | 3 (1)          | 2 (2)            | 20                | 6                        | 14                           | 18                    | 0.30                         |
| <i>Pterostylis</i>   | 3 (3) | 60 (26)   | 19 (9)      | 3 (2)         | 0 (0)          | 0 (0)            | 104               | 44                       | 60                           | 54                    | 0.42                         |
| <i>Rytidosperm</i>   | 2 (2) | 33 (29)   | 17 (9)      | 0 (0)         | 0 (0)          | 1 (1)            | 50                | 39                       | 11                           | 50                    | 0.78                         |
| <i>Senecio</i>       | 2 (1) | 34 (-)    | 39 (-)      | 1 (-)         | 3 (-)          | 2 (-)            | 81                | -                        | -                            | -                     | -                            |
| <i>Tetragonia</i>    | 2 (1) | 5 (1)     | 2 (1)       | 1 (1)         | 2 (1)          | 3 (1)            | 6                 | 1                        | 5                            | -                     | 0.17                         |
| <i>Wahlenbergia</i>  | 2 (1) | 24 (1)    | 10 (0)      | 1 (0)         | 0 (0)          | 1 (0)            | 34                | 2                        | 32                           | -                     | 0.06                         |
| <i>Xylosma</i>       | 2 (2) | 2 (0)     | 0 (0)       | 20 (1)        | 0 (0)          | 0 (0)            | 25                | 3                        | 22                           | 8                     | 0.12                         |

**Table S2** Accession numbers for sequences included in the *Adiantum* phylogenetic tree

| Genus                | Species                 | rbcl     |
|----------------------|-------------------------|----------|
| <i>Adiantum</i>      | <i>aethiopicum</i>      | EF469955 |
| <i>Adiantum</i>      | <i>cajennense</i>       | EF473675 |
| <i>Adiantum</i>      | <i>capillus-veneris</i> | DQ432659 |
| <i>Adiantum</i>      | <i>cuneatum</i>         | EF473676 |
| <i>Adiantum</i>      | <i>hispidulum</i>       | EF590493 |
| <i>Adiantum</i>      | <i>latifolium</i>       | EF473677 |
| <i>Adiantum</i>      | <i>malesianum</i>       | EF452132 |
| <i>Adiantum</i>      | <i>obliquum</i>         | EF473678 |
| <i>Adiantum</i>      | <i>pedatum</i>          | U05602   |
| <i>Adiantum</i>      | <i>pentadactylon</i>    | EF473679 |
| <i>Adiantum</i>      | <i>peruvianum</i>       | EF452133 |
| <i>Adiantum</i>      | <i>pubescens</i>        | JF950800 |
| <i>Adiantum</i>      | <i>raddianum</i>        | EF473680 |
| <i>Adiantum</i>      | <i>reniforme</i>        | AY573519 |
| <i>Adiantum</i>      | <i>serratodentatum</i>  | EF473681 |
| <i>Adiantum</i>      | <i>subcordatum</i>      | EF473682 |
| <i>Adiantum</i>      | <i>tenerum</i>          | EF452134 |
| <i>Adiantum</i>      | <i>terminatum</i>       | EF473683 |
| <i>Adiantum</i>      | <i>tetraphyllum</i>     | EF452135 |
| <i>Adiantum</i>      | <i>venustum</i>         | EF452136 |
| <i>Anetium</i>       | <i>citrifolium</i>      | ACU21284 |
| <i>Antrophyum</i>    | <i>latifolium</i>       | EF452138 |
| <i>Haplopteris</i>   | <i>elongata</i>         | EF452153 |
| <i>Hecistopteris</i> | <i>pumila</i>           | HPU21286 |
| <i>Monogramma</i>    | <i>graminea</i>         | EF452157 |
| <i>Polytaenium</i>   | <i>cajenense</i>        | PCU20934 |
| <i>Rheopteris</i>    | <i>cheesmaniae</i>      | EF452176 |
| <i>Vittaria</i>      | <i>graminifolia</i>     | VGU21295 |
| <i>Vittaria</i>      | <i>gardneriana</i>      | VGU21294 |

**Table S3** Accession numbers for sequences included in the *Alyxia* phylogenetic tree

| Genus                  | Species                 | rps16    | trnL-trnF | trnL     |
|------------------------|-------------------------|----------|-----------|----------|
| <i>Alyxia</i>          | <i>buxifolia</i>        | -        | AF214152  | AF214306 |
| <i>Alyxia</i>          | <i>grandis</i>          | EF456518 | EF456089  | EF456089 |
| <i>Alyxia</i>          | <i>lindii</i>           | JF950818 | JF950898  | JF950879 |
| <i>Alyxia</i>          | <i>oblongata</i>        | EF456519 | EF456090  | EF456090 |
| <i>Alyxia</i>          | <i>reinwardtii</i>      | DQ660559 | EF456091  | EF456091 |
| <i>Alyxia</i>          | <i>ruscifolia</i>       | JF950819 | JF950899  | JF950880 |
| <i>Alyxia</i>          | <i>spicata</i>          | EF456521 | EF456092  | EF456092 |
| <i>Alyxia</i>          | <i>squamulosa</i>       | JF950820 | JF950900  | JF950881 |
| <i>Apocynum</i>        | <i>androsaemifolium</i> | EF456546 | -         | -        |
| <i>Apocynum</i>        | <i>cannabinum</i>       | DQ660563 | -         | -        |
| <i>nerium</i>          | <i>oleander</i>         | EF456596 | -         | -        |
| <i>Strychnos</i>       | <i>lucida</i>           | DQ660614 | -         | -        |
| <i>Strychnos</i>       | <i>tomentosa</i>        | -        | AF102484  | AF102484 |
| <i>Tabernaemontana</i> | <i>catharinensis</i>    | DQ660618 | -         | -        |
| <i>Tabernaemontana</i> | <i>floribunda</i>       | -        | AF214197  | AF214351 |
| <i>Thevetia</i>        | <i>peruviana</i>        | DQ660621 | EF456088  | EF456088 |
| <i>Vinca</i>           | <i>minor</i>            | DQ660623 | FJ490766  | FJ490766 |
| <i>Wrightia</i>        | <i>arborea</i>          | DQ660625 | EF456164  | EF456164 |

**Table S4** Accession numbers for sequences included in the *Asplenium* phylogenetic tree

| Genus            | Species                | rbcl     | trnL-trnF | Genus            | Species               | rbcl     | trnL-trnF | Genus                 | Species                  | rbcl     | trnL-trnF |
|------------------|------------------------|----------|-----------|------------------|-----------------------|----------|-----------|-----------------------|--------------------------|----------|-----------|
| <i>Asplenium</i> | <i>abscissum</i>       | AY300102 | -         | <i>Asplenium</i> | <i>hispanicum</i>     | AY300119 | -         | <i>Asplenium</i>      | <i>rhizophyllum</i>      | AY300136 | -         |
| <i>Asplenium</i> | <i>adiantum-nigrum</i> | AF318600 | -         | <i>Asplenium</i> | <i>hobdyi</i>         | AY549736 | -         | <i>Asplenium</i>      | <i>richardii</i>         | AY300138 | EF418413  |
| <i>Asplenium</i> | <i>aegaeum</i>         | AY300103 | -         | <i>Asplenium</i> | <i>hookerianum</i>    | AY283229 | AY538184  | <i>Asplenium</i>      | <i>ruprechtii</i>        | U30606   | -         |
| <i>Asplenium</i> | <i>aethiopicum</i>     | AF240654 | AF525233  | <i>Asplenium</i> | <i>hostmannii</i>     | AY300120 | -         | <i>Asplenium</i>      | <i>ruta-muraria</i>      | AF525273 | -         |
| <i>Asplenium</i> | <i>affine</i>          | AY300104 | -         | <i>Asplenium</i> | <i>incisum</i>        | AY549748 | -         | <i>Asplenium</i>      | <i>salicifolium</i>      | AY300139 | -         |
| <i>Asplenium</i> | <i>anceps</i>          | AY300105 | -         | <i>Asplenium</i> | <i>interjectum</i>    | AY545480 | -         | <i>Asplenium</i>      | <i>sandersonii</i>       | AF525274 | AF525247  |
| <i>Asplenium</i> | <i>angustum</i>        | AY300106 | AY300053  | <i>Asplenium</i> | <i>jahandiezii</i>    | AY300121 | -         | <i>Asplenium</i>      | <i>scolopendrium</i>     | AF240645 | AF525262  |
| <i>Asplenium</i> | <i>anisophyllum</i>    | AY300107 | -         | <i>Asplenium</i> | <i>juglandifolium</i> | AF525269 | -         | <i>Asplenium</i>      | <i>seelosii</i>          | AY300140 | -         |
| <i>Asplenium</i> | <i>antiquum</i>        | EU240033 | EU240028  | <i>Asplenium</i> | <i>laciniatum</i>     | AY549747 | -         | <i>Asplenium</i>      | <i>septentrionale</i>    | AF525275 | -         |
| <i>Asplenium</i> | <i>appendiculatum</i>  | -        | AY283202  | <i>Asplenium</i> | <i>lamprophyllum</i>  | AY283230 | AY538185  | <i>Asplenium</i>      | <i>serratum</i>          | AY300141 | -         |
| <i>Asplenium</i> | <i>appendiculatum</i>  | -        | AY283203  | <i>Asplenium</i> | <i>lolegnamense</i>   | AF538315 | -         | <i>Asplenium</i>      | <i>shuttleworthianum</i> | AY283235 | AY283223  |
| <i>Asplenium</i> | <i>aureum</i>          | AF538311 | -         | <i>Asplenium</i> | <i>loxoscapoides</i>  | AY300122 | -         | <i>Asplenium</i>      | <i>simplicifrons</i>     | AY300142 | AY300089  |
| <i>Asplenium</i> | <i>australasicum</i>   | AY283237 | AY641792  | <i>Asplenium</i> | <i>lucidum</i>        | AY549749 | AY549853  | <i>Asplenium</i>      | <i>smedsii</i>           | AY300143 | -         |
| <i>Asplenium</i> | <i>bourgaei</i>        | AY300108 | -         | <i>Asplenium</i> | <i>lunulatum</i>      | AY549732 | -         | <i>Asplenium</i>      | <i>sphenotomum</i>       | AY300144 | -         |
| <i>Asplenium</i> | <i>bulbiferum</i>      | AY283226 | AY538182  | <i>Asplenium</i> | <i>lushanense</i>     | AY545481 | -         | <i>Asplenium</i>      | <i>surrogatum</i>        | EU240034 | EU240029  |
| <i>Asplenium</i> | <i>bullatum</i>        | AY300109 | -         | <i>Asplenium</i> | <i>majoricum</i>      | AF318587 | -         | <i>Asplenium</i>      | <i>tenerum</i>           | AY300145 | AY300092  |
| <i>Asplenium</i> | <i>caudatum</i>        | AY300110 | -         | <i>Asplenium</i> | <i>mannii</i>         | AY300124 | -         | <i>Asplenium</i>      | <i>theciferum</i>        | AY300123 | AY300070  |
| <i>Asplenium</i> | <i>ceterach</i>        | AF538313 | -         | <i>Asplenium</i> | <i>milnei</i>         | EU240032 | EU240030  | <i>Asplenium</i>      | <i>tricholepis</i>       | AY549729 | -         |
| <i>Asplenium</i> | <i>cordatum</i>        | AF538319 | -         | <i>Asplenium</i> | <i>milnei</i>         | JF950801 | JF950901  | <i>Asplenium</i>      | <i>trichomanes</i>       | EF463157 | EF645613  |
| <i>Asplenium</i> | <i>cristatum</i>       | AY549731 | -         | <i>Asplenium</i> | <i>monanthes</i>      | AY300125 | -         | <i>Asplenium</i>      | <i>variabile</i>         | AY300146 | -         |
| <i>Asplenium</i> | <i>cuneatifforme</i>   | AY549755 | -         | <i>Asplenium</i> | <i>montanum</i>       | AY300126 | -         | <i>Asplenium</i>      | <i>varians</i>           | AY545478 | -         |
| <i>Asplenium</i> | <i>cuneifolium</i>     | AF525265 | -         | <i>Asplenium</i> | <i>myriophyllum</i>   | AY300127 | -         | <i>Asplenium</i>      | <i>viellardii</i>        | AY549750 | AY549854  |
| <i>Asplenium</i> | <i>cuspidatum</i>      | AY300111 | -         | <i>Asplenium</i> | <i>nidus</i>          | AF525270 | AF425118  | <i>Asplenium</i>      | <i>viride</i>            | AY549734 | -         |
| <i>Asplenium</i> | <i>cyprium</i>         | AF538314 | -         | <i>Asplenium</i> | <i>normale</i>        | EF463152 | AY549838  | <i>Asplenium</i>      | <i>volkensii</i>         | AY300148 | -         |
| <i>Asplenium</i> | <i>dalhousiae</i>      | AF538317 | -         | <i>Asplenium</i> | <i>northlandicum</i>  | EU240031 | AY538178  | <i>Asplenium</i>      | <i>wrightii</i>          | AY549730 | -         |
| <i>Asplenium</i> | <i>dareoides</i>       | AY300112 | -         | <i>Asplenium</i> | <i>obliquum</i>       | AY300129 | -         | <i>Asplenium</i>      | <i>wrightioides</i>      | AY725031 | -         |
| <i>Asplenium</i> | <i>difforme</i>        | AY641801 | AY641794  | <i>Asplenium</i> | <i>oblongifolium</i>  | AY283231 | AY538175  | <i>Asplenium</i>      | <i>yoshinagae</i>        | AY725030 | -         |
| <i>Asplenium</i> | <i>dimorphum</i>       | -        | AY641808  | <i>Asplenium</i> | <i>obtusatum</i>      | AY300130 | AY300076  | <i>Asplenium</i>      | <i>yunnanense</i>        | AY545482 | -         |
| <i>Asplenium</i> | <i>elliottii</i>       | AY549753 | -         | <i>Asplenium</i> | <i>octoploideum</i>   | AF538316 | -         | <i>Athyrium</i>       | <i>filix-femina</i>      | AY818676 | AY540046  |
| <i>Asplenium</i> | <i>emarginatum</i>     | AF525266 | -         | <i>Asplenium</i> | <i>onopteris</i>      | AY300131 | -         | <i>Blechnum</i>       | <i>brasiliense</i>       | -        | DQ683436  |
| <i>Asplenium</i> | <i>erectum</i>         | AY300113 | -         | <i>Asplenium</i> | <i>pauperequitum</i>  | AY283233 | -         | <i>Blechnum</i>       | <i>occidentale</i>       | AY137670 | -         |
| <i>Asplenium</i> | <i>feei</i>            | AF525267 | AF525244  | <i>Asplenium</i> | <i>pekinense</i>      | AY545479 | -         | <i>Hymenasplenium</i> | <i>cheilosorum</i>       | AB014704 | AY549830  |
| <i>Asplenium</i> | <i>filipes</i>         | U30605   | -         | <i>Asplenium</i> | <i>petrarchae</i>     | AF525271 | -         | <i>Hymenasplenium</i> | <i>excisum</i>           | AY549728 | AY549831  |
| <i>Asplenium</i> | <i>fissum</i>          | AY300114 | -         | <i>Asplenium</i> | <i>phillipsianum</i>  | AF538320 | -         | <i>Hymenasplenium</i> | <i>obliquissimum</i>     | AB016187 | -         |
| <i>Asplenium</i> | <i>flabellifolium</i>  | AY283227 | AY283209  | <i>Asplenium</i> | <i>phyllitidis</i>    | AY300132 | -         | <i>Hymenasplenium</i> | <i>unilaterale</i>       | AF240652 | AF240668  |
| <i>Asplenium</i> | <i>flaccidum</i>       | AY283228 | AY283210  | <i>Asplenium</i> | <i>platyneuron</i>    | AF525272 | -         | <i>Polystichum</i>    | <i>vestitum</i>          | AY300099 | AY300046  |
| <i>Asplenium</i> | <i>fontanum</i>        | AF525268 | -         | <i>Asplenium</i> | <i>polyodon</i>       | AY300133 | AY300080  | <i>Woodsia</i>        | <i>polystichoides</i>    | U05657   | DQ480129  |
| <i>Asplenium</i> | <i>formosum</i>        | AY300116 | -         | <i>Asplenium</i> | <i>praegracile</i>    | AY300134 | -         | <i>Woodwardia</i>     | <i>fimbriata</i>         | AY137662 | -         |
| <i>Asplenium</i> | <i>fragile</i>         | AY549733 | -         | <i>Asplenium</i> | <i>praemorsum</i>     | AY549754 | -         | <i>Woodwardia</i>     | <i>japonica</i>          | -        | DQ683432  |
| <i>Asplenium</i> | <i>friesiorum</i>      | AY549756 | -         | <i>Asplenium</i> | <i>prolongatum</i>    | AY549752 | AY549856  |                       |                          |          |           |
| <i>Asplenium</i> | <i>gemmaferum</i>      | AY300117 | AY300064  | <i>Asplenium</i> | <i>protensum</i>      | AY300135 | -         |                       |                          |          |           |
| <i>Asplenium</i> | <i>hallbergii</i>      | AY300118 | -         | <i>Asplenium</i> | <i>pterodiodes</i>    | JF950802 | JF950902  |                       |                          |          |           |
| <i>Asplenium</i> | <i>haughtonii</i>      | AF538321 | -         | <i>Asplenium</i> | <i>punjabense</i>     | AF538318 | -         |                       |                          |          |           |
| <i>Asplenium</i> | <i>heterochroum</i>    | AY549745 | -         | <i>Asplenium</i> | <i>resiliens</i>      | AY549746 | -         |                       |                          |          |           |

**Table S5** Accession numbers for sequences included in the *Blechnum* phylogenetic tree

| Genus           | Species               | rbcl     | trnL +<br>trnL-trnF | Genus             | Species                  | rbcl     | trnL +<br>trnL-trnF |
|-----------------|-----------------------|----------|---------------------|-------------------|--------------------------|----------|---------------------|
| <i>Blechnum</i> | <i>amabile</i>        | AB040544 | -                   | <i>Blechnum</i>   | <i>moorei</i>            | AB040562 | -                   |
| <i>Blechnum</i> | <i>appendiculatum</i> | -        | DQ683373            | <i>Blechnum</i>   | <i>nigrum</i>            | -        | DQ683400            |
| <i>Blechnum</i> | <i>articulatum</i>    | AB040546 | -                   | <i>Blechnum</i>   | <i>norfolkianum</i>      | -        | DQ683402            |
| <i>Blechnum</i> | <i>blechnoides</i>    | -        | DQ683375            | <i>Blechnum</i>   | <i>novae-zelandiae</i>   | EF469957 | DQ683404            |
| <i>Blechnum</i> | <i>brasiliense</i>    | AB040545 | DQ683436            | <i>Blechnum</i>   | <i>nudum</i>             | -        | DQ683405            |
| <i>Blechnum</i> | <i>capense</i>        | AB040547 | -                   | <i>Blechnum</i>   | <i>obtusatum</i>         | AB040564 | -                   |
| <i>Blechnum</i> | <i>cartilagineum</i>  | AB040548 | -                   | <i>Blechnum</i>   | <i>occidentale</i>       | EU352296 | -                   |
| <i>Blechnum</i> | <i>castaneum</i>      | AB040549 | -                   | <i>Blechnum</i>   | <i>oceanicum</i>         | AB040566 | -                   |
| <i>Blechnum</i> | <i>chambersii</i>     | -        | DQ683378            | <i>Blechnum</i>   | <i>orientale</i>         | U05606   | -                   |
| <i>Blechnum</i> | <i>chilense</i>       | AB040550 | -                   | <i>Blechnum</i>   | <i>patersonii</i>        | AB040569 | DQ683406            |
| <i>Blechnum</i> | <i>colensoi</i>       | -        | DQ683380            | <i>Blechnum</i>   | <i>penna-marina</i>      | -        | DQ683409            |
| <i>Blechnum</i> | <i>contiguum</i>      | JF950803 | JF950938            | <i>Blechnum</i>   | <i>polypodioides</i>     | EF463159 | -                   |
| <i>Blechnum</i> | <i>coriaceum</i>      | AB040551 | -                   | <i>Blechnum</i>   | <i>procerum</i>          | -        | DQ683411            |
| <i>Blechnum</i> | <i>doodioides</i>     | AB040552 | -                   | <i>Blechnum</i>   | <i>punctulatum</i>       | -        | DQ683412            |
| <i>Blechnum</i> | <i>durum</i>          | -        | DQ683384            | <i>Blechnum</i>   | <i>schomburgkii</i>      | EF463160 | -                   |
| <i>Blechnum</i> | <i>filiforme</i>      | -        | DQ683386            | <i>Blechnum</i>   | <i>serrulatum</i>        | AY137671 | -                   |
| <i>Blechnum</i> | <i>fluviatile</i>     | -        | DQ683389            | <i>Blechnum</i>   | <i>simillimum</i>        | AB040570 | -                   |
| <i>Blechnum</i> | <i>fraseri</i>        | AB040553 | DQ683391            | <i>Blechnum</i>   | <i>spicant</i>           | AB040571 | DQ683413            |
| <i>Blechnum</i> | <i>fullagarii</i>     | -        | JF950939            | <i>Blechnum</i>   | <i>triangularifolium</i> | -        | DQ683415            |
| <i>Blechnum</i> | <i>gibbum</i>         | AB040554 | -                   | <i>Blechnum</i>   | <i>vieillardii</i>       | AB040573 | -                   |
| <i>Blechnum</i> | <i>glandulosum</i>    | AB040555 | -                   | <i>Blechnum</i>   | <i>vulcanicum</i>        | -        | DQ683417            |
| <i>Blechnum</i> | <i>gracile</i>        | EF463158 | -                   | <i>Blechnum</i>   | <i>wattsii</i>           | -        | DQ683418            |
| <i>Blechnum</i> | <i>hancockii</i>      | AB040556 | -                   | <i>Blechnum</i>   | <i>whelanii</i>          | AB040607 | -                   |
| <i>Blechnum</i> | <i>hastatum</i>       | AB040557 | -                   | <i>Blechnum</i>   | <i>wurunuran</i>         | AB040575 | -                   |
| <i>Blechnum</i> | <i>howeanum</i>       | JF950804 | JF950940            | <i>Doodia</i>     | <i>mollis</i>            | AB040579 | DQ683428            |
| <i>Blechnum</i> | <i>indicum</i>        | AB040558 | -                   | <i>Doodia</i>     | <i>squarrosa</i>         | AB040580 | DQ683430            |
| <i>Blechnum</i> | <i>magellanicum</i>   | AB040560 | -                   | <i>Lorinseria</i> | <i>areolata</i>          | AF425102 | -                   |
| <i>Blechnum</i> | <i>membranaceum</i>   | -        | DQ683393            | <i>Sadleria</i>   | <i>cyatheoides</i>       | AF425103 | DQ683431            |
| <i>Blechnum</i> | <i>microbasis</i>     | AB040561 | -                   | <i>Woodwardia</i> | <i>fimbriata</i>         | AY137662 | -                   |
| <i>Blechnum</i> | <i>milnei</i>         | -        | DQ683394            | <i>Woodwardia</i> | <i>japonica</i>          | AY137664 | DQ683432            |
| <i>Blechnum</i> | <i>minus</i>          | -        | DQ683396            | <i>Woodwardia</i> | <i>prolifera</i>         | AY137666 | DQ683433            |
| <i>Blechnum</i> | <i>montanum</i>       | -        | DQ683398            | <i>Woodwardia</i> | <i>radicans</i>          | AY137667 | DQ683434            |

**Table S6** Accession numbers for sequences included in the *Calystegia* phylogenetic tree

| Genus              | Species             | clone/subsp.                 | ITS      |
|--------------------|---------------------|------------------------------|----------|
| <i>Calystegia</i>  | <i>affinis</i>      | x22c14                       | JF950719 |
| <i>Calystegia</i>  | <i>affinis</i>      | x22c15                       | JF950720 |
| <i>Calystegia</i>  | <i>affinis</i>      | x22c16                       | JF950721 |
| <i>Calystegia</i>  | <i>affinis</i>      | x22c17                       | JF950722 |
| <i>Calystegia</i>  | <i>affinis</i>      | x22c18                       | JF950723 |
| <i>Calystegia</i>  | <i>affinis</i>      | x22c19                       | JF950724 |
| <i>Calystegia</i>  | <i>affinis</i>      | x22c20                       | JF950725 |
| <i>Calystegia</i>  | <i>howittiorum</i>  |                              | GQ119530 |
| <i>Calystegia</i>  | <i>marginata</i>    |                              | EU812827 |
| <i>Calystegia</i>  | <i>pellita</i>      |                              | GQ119509 |
| <i>Calystegia</i>  | <i>pubescens</i>    |                              | GQ119508 |
| <i>Calystegia</i>  | <i>pulchra</i>      |                              | GQ119540 |
| <i>Calystegia</i>  | <i>pulchra</i>      |                              | GQ119539 |
| <i>Calystegia</i>  | <i>sepium</i>       |                              | AY560267 |
| <i>Calystegia</i>  | <i>sepium</i>       | subsp_ <i>americana</i>      | GQ119513 |
| <i>Calystegia</i>  | <i>sepium</i>       | subsp_ <i>americana</i> _2   | GQ119512 |
| <i>Calystegia</i>  | <i>sepium</i>       | subsp_ <i>limnophila</i>     | GQ119510 |
| <i>Calystegia</i>  | <i>sepium</i>       | subsp_ <i>roseata</i>        | EU812829 |
| <i>Calystegia</i>  | <i>sepium</i>       | subsp_ <i>roseata</i> _2     | EU812828 |
| <i>Calystegia</i>  | <i>sepium</i>       | subsp_ <i>roseata</i> _4     | GQ119519 |
| <i>Calystegia</i>  | <i>sepium</i>       | subsp_ <i>sepium</i>         | GQ119556 |
| <i>Calystegia</i>  | <i>sepium</i>       | subsp_ <i>spectabilis</i>    | GQ119584 |
| <i>Calystegia</i>  | <i>sepium</i>       | subsp_ <i>spectabilis</i> _2 | GQ119583 |
| <i>Calystegia</i>  | <i>silvatica</i>    |                              | AY560269 |
| <i>Calystegia</i>  | <i>silvatica</i>    | subsp_ <i>disjuncta</i>      | GQ119570 |
| <i>Calystegia</i>  | <i>silvatica</i>    | subsp_ <i>silvatica</i>      | GQ119548 |
| <i>Calystegia</i>  | <i>soldanella</i>   |                              | EU812833 |
| <i>Calystegia</i>  | <i>tuguriorum</i>   |                              | EU812835 |
| <i>Convolvulus</i> | <i>floridus</i>     |                              | EF371754 |
| <i>Convolvulus</i> | <i>scoparius</i>    |                              | EF371762 |
| <i>Ipomoea</i>     | <i>microdactyla</i> |                              | EF029037 |
| <i>Ipomoea</i>     | <i>obscura</i>      |                              | GQ478092 |
| <i>Merremia</i>    | <i>tuberosa</i>     |                              | AF110909 |

**Table S7** Accession numbers for sequences included in the *Carex* phylogenetic tree

| Genus        | Species                | ITS      | Genus        | Species             | ITS      | Genus        | Species               | ITS      | Genus          | Species              | ITS      |
|--------------|------------------------|----------|--------------|---------------------|----------|--------------|-----------------------|----------|----------------|----------------------|----------|
| <i>Carex</i> | <i>concinnooides</i>   | AF284965 | <i>Carex</i> | <i>cockayneana</i>  | EU352221 | <i>Carex</i> | <i>hirtigluma</i>     | EU288596 | <i>Carex</i>   | <i>peckii</i>        | DQ998940 |
| <i>Carex</i> | <i>eburnea</i>         | AF285000 | <i>Carex</i> | <i>colensoi</i>     | EU352222 | <i>Carex</i> | <i>hystericina</i>    | AY757574 | <i>Carex</i>   | <i>polystachya</i>   | AF027487 |
| <i>Carex</i> | <i>brunnea</i>         | AF285003 | <i>Carex</i> | <i>cruciata</i>     | AF027489 | <i>Carex</i> | <i>illota</i>         | AY779110 | <i>Carex</i>   | <i>preslii</i>       | AY779146 |
| <i>Carex</i> | <i>lanuginosa</i>      | AF285031 | <i>Carex</i> | <i>cuprina</i>      | FJ694688 | <i>Carex</i> | <i>inops</i>          | AY686721 | <i>Carex</i>   | <i>pseudocuraica</i> | AY779148 |
| <i>Carex</i> | <i>mucronata</i>       | AY278257 | <i>Carex</i> | <i>declinata</i>    | EU000960 | <i>Carex</i> | <i>insularis</i>      | EU812738 | <i>Carex</i>   | <i>pyramidalis</i>   | EU288616 |
| <i>Carex</i> | <i>kitaibeliana</i>    | AY278258 | <i>Carex</i> | <i>deflexa</i>      | AY686720 | <i>Carex</i> | <i>integra</i>        | AY779111 | <i>Carex</i>   | <i>remota</i>        | AY779150 |
| <i>Carex</i> | <i>alba</i>            | AY278259 | <i>Carex</i> | <i>depauperata</i>  | AY757621 | <i>Carex</i> | <i>intumescens</i>    | AY757579 | <i>Carex</i>   | <i>renauldii</i>     | EU288617 |
| <i>Carex</i> | <i>ericetorum</i>      | AY278281 | <i>Carex</i> | <i>dipsacea</i>     | EU352223 | <i>Carex</i> | <i>inyx</i>           | EU812734 | <i>Carex</i>   | <i>resectans</i>     | EU352231 |
| <i>Carex</i> | <i>hirta</i>           | AY278296 | <i>Carex</i> | <i>disperma</i>     | EU000976 | <i>Carex</i> | <i>johnstonii</i>     | EU288600 | <i>Carex</i>   | <i>retrorsa</i>      | AY757577 |
| <i>Carex</i> | <i>lasiocarpa</i>      | AY278297 | <i>Carex</i> | <i>divisa</i>       | DQ115154 | <i>Carex</i> | <i>kalooides</i>      | AY699638 | <i>Carex</i>   | <i>riparia</i>       | AY757571 |
| <i>Carex</i> | <i>inversa</i>         | AY699625 | <i>Carex</i> | <i>drymophila</i>   | DQ998911 | <i>Carex</i> | <i>kermadecensis</i>  | AY699617 | <i>Carex</i>   | <i>rupestris</i>     | FJ694751 |
| <i>Carex</i> | <i>breviculmis</i>     | AY699627 | <i>Carex</i> | <i>echinata</i>     | EU352224 | <i>Carex</i> | <i>laeviculmis</i>    | DQ115196 | <i>Carex</i>   | <i>schweinitzii</i>  | AY757572 |
| <i>Carex</i> | <i>adusta</i>          | AY779065 | <i>Carex</i> | <i>echinochloe</i>  | EU812737 | <i>Carex</i> | <i>laxa</i>           | DQ998928 | <i>Carex</i>   | <i>serpenticola</i>  | AY325476 |
| <i>Carex</i> | <i>albicans</i>        | AY325479 | <i>Carex</i> | <i>elongata</i>     | DQ115166 | <i>Carex</i> | <i>leporinella</i>    | AY779114 | <i>Carex</i>   | <i>serratodens</i>   | DQ384183 |
| <i>Carex</i> | <i>albursina</i>       | AY757626 | <i>Carex</i> | <i>exilis</i>       | DQ115168 | <i>Carex</i> | <i>livida</i>         | AY757628 | <i>Carex</i>   | <i>solandrii</i>     | EU331116 |
| <i>Carex</i> | <i>amphibola</i>       | DQ006000 | <i>Carex</i> | <i>fascicularis</i> | EU352234 | <i>Carex</i> | <i>loliacea</i>       | DQ115206 | <i>Carex</i>   | <i>spectabilis</i>   | GQ223637 |
| <i>Carex</i> | <i>amplifolia</i>      | AY757584 | <i>Carex</i> | <i>fecunda</i>      | DQ115170 | <i>Carex</i> | <i>longibrachiata</i> | EU812735 | <i>Carex</i>   | <i>steudneri</i>     | EU288637 |
| <i>Carex</i> | <i>andringitrensis</i> | EU288568 | <i>Carex</i> | <i>fernaldiana</i>  | DQ998913 | <i>Carex</i> | <i>longii</i>         | AY779115 | <i>Carex</i>   | <i>suberecta</i>     | AY779166 |
| <i>Carex</i> | <i>angolensis</i>      | EU288569 | <i>Carex</i> | <i>feta</i>         | AY779099 | <i>Carex</i> | <i>lucorum</i>        | AY325464 | <i>Carex</i>   | <i>tasmanica</i>     | DQ384185 |
| <i>Carex</i> | <i>arcta</i>           | DQ115098 | <i>Carex</i> | <i>filiformis</i>   | FJ694727 | <i>Carex</i> | <i>maackii</i>        | AY779116 | <i>Carex</i>   | <i>tenuiflora</i>    | AY757427 |
| <i>Carex</i> | <i>baccans</i>         | AF027488 | <i>Carex</i> | <i>filipes</i>      | DQ998914 | <i>Carex</i> | <i>mackenziei</i>     | DQ115208 | <i>Carex</i>   | <i>tonsa</i>         | AY686723 |
| <i>Carex</i> | <i>baldensis</i>       | EU288543 | <i>Carex</i> | <i>fimbriata</i>    | EU288551 | <i>Carex</i> | <i>mariposana</i>     | AY779118 | <i>Carex</i>   | <i>triangularis</i>  | EU001073 |
| <i>Carex</i> | <i>biltmoreana</i>     | DQ998902 | <i>Carex</i> | <i>floridana</i>    | AY325482 | <i>Carex</i> | <i>media</i>          | DQ998932 | <i>Carex</i>   | <i>trichocarpa</i>   | AY757570 |
| <i>Carex</i> | <i>binervis</i>        | DQ384112 | <i>Carex</i> | <i>foetida</i>      | AY280544 | <i>Carex</i> | <i>molesta</i>        | DQ461143 | <i>Carex</i>   | <i>trisperma</i>     | DQ115298 |
| <i>Carex</i> | <i>blanda</i>          | AF027484 | <i>Carex</i> | <i>foliosissima</i> | DQ998916 | <i>Carex</i> | <i>monostachya</i>    | EU288608 | <i>Carex</i>   | <i>tuckermanii</i>   | AY757573 |
| <i>Carex</i> | <i>bohemica</i>        | AY779073 | <i>Carex</i> | <i>furva</i>        | EU541868 | <i>Carex</i> | <i>morrowii</i>       | EU288558 | <i>Carex</i>   | <i>turbinata</i>     | AY325465 |
| <i>Carex</i> | <i>bonariensis</i>     | DQ115106 | <i>Carex</i> | <i>gayana</i>       | EU000982 | <i>Carex</i> | <i>muelleri</i>       | AY699643 | <i>Carex</i>   | <i>umbellata</i>     | AY325486 |
| <i>Carex</i> | <i>breweri</i>         | AF285012 | <i>Carex</i> | <i>geophila</i>     | AY325481 | <i>Carex</i> | <i>nigromarginata</i> | AY325478 | <i>Carex</i>   | <i>vernacula</i>     | DQ115306 |
| <i>Carex</i> | <i>brunnescens</i>     | EU541872 | <i>Carex</i> | <i>glacialis</i>    | AY757625 | <i>Carex</i> | <i>novae-angliae</i>  | AY325475 | <i>Carex</i>   | <i>wakatipu</i>      | EU352238 |
| <i>Carex</i> | <i>caryophyllea</i>    | EU288547 | <i>Carex</i> | <i>glareosa</i>     | EU541871 | <i>Carex</i> | <i>obispoensis</i>    | AY757620 | <i>Carex</i>   | <i>wootonii</i>      | AY779181 |
| <i>Carex</i> | <i>chathamica</i>      | AY699641 | <i>Carex</i> | <i>globosa</i>      | AY325487 | <i>Carex</i> | <i>obtusata</i>       | AY241981 | <i>Carex</i>   | <i>pumila</i>        | EU352230 |
| <i>Carex</i> | <i>cherokeensis</i>    | AY757619 | <i>Carex</i> | <i>graminifolia</i> | EU288594 | <i>Carex</i> | <i>oligocarpa</i>     | EF590759 | <i>Uncinia</i> | <i>astonii</i>       | EU812836 |
| <i>Carex</i> | <i>chihuahuensis</i>   | EU000953 | <i>Carex</i> | <i>hartmanii</i>    | EU288552 | <i>Carex</i> | <i>pachygyna</i>      | DQ998936 | <i>Uncinia</i> | <i>divaricata</i>    | EU812837 |
| <i>Carex</i> | <i>chlorosaccus</i>    | EU288577 | <i>Carex</i> | <i>haydenii</i>     | AY779106 | <i>Carex</i> | <i>parciflora</i>     | DQ998939 |                |                      |          |
| <i>Carex</i> | <i>chordorrhiza</i>    | DQ115126 | <i>Carex</i> | <i>heteroneura</i>  | DQ998921 | <i>Carex</i> | <i>paupercula</i>     | FJ694731 |                |                      |          |

**Table S8** Accession numbers for sequences included in the *Coprosma* phylogenetic tree

| Genus               | Species             | rps16    | ITS      | 5S       | Genus               | Species               | rps16    | ITS      | 5S       |
|---------------------|---------------------|----------|----------|----------|---------------------|-----------------------|----------|----------|----------|
| <i>Anthospermum</i> | <i>aethiopicum</i>  | AF257897 | AF257896 | -        | <i>Coprosma</i>     | <i>parviflora</i>     | JF950847 | JF950745 | JF950672 |
| <i>Coprosma</i>     | <i>acerosa</i>      | JF950821 | AY273190 | JF950649 | <i>Coprosma</i>     | <i>perpusilla</i>     | -        | JF950746 | -        |
| <i>Coprosma</i>     | <i>acutifolia</i>   | -        | EF660535 | -        | <i>Coprosma</i>     | <i>persicifolia</i>   | AF257910 | AF257909 | -        |
| <i>Coprosma</i>     | <i>antipoda</i>     | AF257902 | AF257901 | -        | <i>Coprosma</i>     | <i>petiolata</i>      | -        | EF635455 | -        |
| <i>Coprosma</i>     | <i>arborea</i>      | -        | EU169116 | -        | <i>Coprosma</i>     | <i>petriei</i>        | JF950848 | AY191804 | JF950673 |
| <i>Coprosma</i>     | <i>banksii</i>      | JF950822 | -        | JF950650 | <i>Coprosma</i>     | <i>pilosa</i>         | -        | EF660530 | -        |
| <i>Coprosma</i>     | <i>baueri</i>       | -        | EF660529 | -        | <i>Coprosma</i>     | <i>prisca</i>         | JF950849 | JF950747 | JF950674 |
| <i>Coprosma</i>     | <i>brunnea</i>      | -        | AY189124 | -        | <i>Coprosma</i>     | <i>prisca</i>         | JF950850 | JF950748 | JF950675 |
| <i>Coprosma</i>     | <i>chathamica</i>   | -        | EF635443 | -        | <i>Coprosma</i>     | <i>prisca</i>         | JF950851 | JF950749 | JF950676 |
| <i>Coprosma</i>     | <i>cheesemani</i>   | JF950823 | AF257903 | JF950651 | <i>Coprosma</i>     | <i>prisca</i>         | JF950852 | JF950750 | JF950677 |
| <i>Coprosma</i>     | <i>ciliata</i>      | JF950824 | -        | -        | <i>Coprosma</i>     | <i>propinqua</i>      | JF950853 | JF950751 | JF950678 |
| <i>Coprosma</i>     | <i>crassifolia</i>  | JF950825 | AF257905 | JF950652 | <i>Coprosma</i>     | <i>pumila</i>         | -        | FJ695439 | -        |
| <i>Coprosma</i>     | <i>crenulata</i>    | -        | AY191801 | -        | <i>Coprosma</i>     | <i>putida</i>         | JF950854 | JF950752 | JF950679 |
| <i>Coprosma</i>     | <i>cunneata</i>     | JF950826 | JF950726 | JF950653 | <i>Coprosma</i>     | <i>putida</i>         | JF950855 | JF950753 | JF950680 |
| <i>Coprosma</i>     | <i>cunninghamii</i> | -        | -        | JF950654 | <i>Coprosma</i>     | <i>putida</i>         | JF950856 | JF950754 | JF950681 |
| <i>Coprosma</i>     | <i>cymosa</i>       | JF950827 | -        | -        | <i>Coprosma</i>     | <i>putida</i>         | JF950857 | JF950755 | JF950682 |
| <i>Coprosma</i>     | <i>decurva</i>      | JF950828 | -        | -        | <i>Coprosma</i>     | <i>quadrifida</i>     | JF950858 | JF950756 | JF950683 |
| <i>Coprosma</i>     | <i>divergens</i>    | -        | JF950727 | -        | <i>Coprosma</i>     | <i>repens</i>         | JF950859 | JF950757 | JF950684 |
| <i>Coprosma</i>     | <i>elatirioides</i> | -        | AY189122 | -        | <i>Coprosma</i>     | <i>rhamnoides</i>     | JF950860 | JF950758 | JF950685 |
| <i>Coprosma</i>     | <i>ernodeoides</i>  | -        | GQ885142 | -        | <i>Coprosma</i>     | <i>rigida</i>         | JF950861 | JF950759 | JF950686 |
| <i>Coprosma</i>     | <i>fauriei</i>      | AF257908 | AF257907 | -        | <i>Coprosma</i>     | <i>robusta</i>        | AF002735 | JF950760 | -        |
| <i>Coprosma</i>     | <i>foetidissima</i> | JF950829 | JF950728 | -        | <i>Coprosma</i>     | <i>rugosa</i>         | JF950862 | JF950761 | JF950687 |
| <i>Coprosma</i>     | <i>fowerakeri</i>   | JF950830 | JF950729 | JF950655 | <i>Coprosma</i>     | sp. nov               | JF950863 | JF950762 | JF950688 |
| <i>Coprosma</i>     | <i>grandifolia</i>  | -        | GQ130328 | JF950656 | <i>Coprosma</i>     | sp. nov               | JF950864 | JF950763 | JF950689 |
| <i>Coprosma</i>     | <i>hirtella</i>     | JF950831 | JF950730 | JF950657 | <i>Coprosma</i>     | sp. nov               | JF950865 | JF950764 | JF950690 |
| <i>Coprosma</i>     | <i>huttoniana</i>   | JF950832 | JF950731 | JF950658 | <i>Coprosma</i>     | sp. nov               | JF950866 | JF950765 | JF950691 |
| <i>Coprosma</i>     | <i>huttoniana</i>   | JF950833 | JF950732 | JF950659 | <i>Coprosma</i>     | sp. sand              | -        | EU886827 | -        |
| <i>Coprosma</i>     | <i>huttoniana</i>   | JF950834 | JF950733 | JF950660 | <i>Coprosma</i>     | <i>taitensis</i>      | JF950867 | DQ501277 | JF950692 |
| <i>Coprosma</i>     | <i>huttoniana</i>   | JF950835 | JF950734 | JF950661 | <i>Coprosma</i>     | <i>tenuicaulis</i>    | -        | JF950766 | -        |
| <i>Coprosma</i>     | <i>inopinata</i>    | JF950836 | JF950735 | JF950662 | <i>Coprosma</i>     | <i>tenuifolia</i>     | -        | DQ501278 | -        |
| <i>Coprosma</i>     | <i>inopinata</i>    | JF950837 | JF950736 | JF950663 | <i>Coprosma</i>     | <i>waimeae</i>        | AF257915 | AF257914 | -        |
| <i>Coprosma</i>     | <i>intertexta</i>   | -        | AY191802 | -        | <i>Durringtonia</i> | <i>paludosa</i>       | AF257917 | AF257916 | -        |
| <i>Coprosma</i>     | <i>lanceolaris</i>  | JF950838 | JF950737 | JF950664 | <i>Galopina</i>     | <i>crocylloides</i>   | AF002764 | AF257918 | -        |
| <i>Coprosma</i>     | <i>lanceolaris</i>  | JF950839 | JF950738 | JF950665 | <i>Leptostigma</i>  | <i>reptans</i>        | AF257921 | AF257920 | -        |
| <i>Coprosma</i>     | <i>lanceolaris</i>  | JF950840 | JF950739 | JF950666 | <i>Nenax</i>        | <i>acerosa</i>        | AF003606 | -        | -        |
| <i>Coprosma</i>     | <i>lanceolaris</i>  | JF950841 | JF950740 | JF950667 | <i>Nenax</i>        | <i>hirta</i>          | -        | AF257922 | -        |
| <i>Coprosma</i>     | <i>linariifolia</i> | JF950842 | JF950741 | JF950668 | <i>Nertera</i>      | <i>assurgens</i>      | AF257924 | AF257923 | -        |
| <i>Coprosma</i>     | <i>lucida</i>       | -        | GQ130330 | -        | <i>Nertera</i>      | <i>dichondrifolia</i> | AF257926 | DQ501279 | -        |
| <i>Coprosma</i>     | <i>macrocarpa</i>   | -        | EU169114 | -        | <i>Nertera</i>      | <i>granadensis</i>    | AF002741 | AF257927 | -        |
| <i>Coprosma</i>     | <i>microcarpa</i>   | JF950843 | JF950742 | JF950669 | <i>Nertera</i>      | <i>holmboei</i>       | AF257929 | AF257928 | -        |
| <i>Coprosma</i>     | <i>montana</i>      | -        | GQ885143 | -        | <i>Normandia</i>    | <i>neocaledonica</i>  | -        | AF257930 | -        |
| <i>Coprosma</i>     | <i>moorei</i>       | JF950844 | -        | -        | <i>Opercularia</i>  | <i>aspera</i>         | AF257933 | AF257932 | -        |
| <i>Coprosma</i>     | <i>nitida</i>       | -        | JF950743 | -        | <i>Opercularia</i>  | <i>hirsuta</i>        | AF003610 | AF257934 | -        |
| <i>Coprosma</i>     | <i>nivalis</i>      | JF950845 | AY191803 | JF950670 | <i>Opercularia</i>  | <i>varia</i>          | AF257938 | AF257937 | -        |
| <i>Coprosma</i>     | <i>obconica</i>     | JF950846 | JF950744 | JF950671 |                     |                       |          |          |          |

**Table S9** Accession numbers for sequences included in the *Cyathea* phylogenetic tree

| Genus              | Species               | rbcl     | trnL-trnF | Genus          | Species               | rbcl     | trnL-trnF | Genus                   | Species                 | rbcl     | trnL-trnF |
|--------------------|-----------------------|----------|-----------|----------------|-----------------------|----------|-----------|-------------------------|-------------------------|----------|-----------|
| <i>Alsophila</i>   | <i>australis</i>      | -        | AM410314  | <i>Cyathea</i> | <i>dregei</i>         | -        | AM689659  | <i>Cyathea</i>          | <i>schiedeana</i>       | AM410218 | AM410346  |
| <i>Alsophila</i>   | <i>capensis</i>       | -        | AM410316  | <i>Cyathea</i> | <i>excelsa</i>        | AM495767 | AM689665  | <i>Cyathea</i>          | <i>schliebenii</i>      | AM495792 | AM689690  |
| <i>Alsophila</i>   | <i>coactilis</i>      | AM410205 | AM410336  | <i>Cyathea</i> | <i>fadonii</i>        | AM495768 | AM689666  | <i>Cyathea</i>          | <i>senilis</i>          | AM410203 | AM410332  |
| <i>Alsophila</i>   | <i>colensoi</i>       | -        | AM410318  | <i>Cyathea</i> | <i>furfuracea</i>     | AM410224 | AM410352  | <i>Cyathea</i>          | <i>serratifolia</i>     | AM495793 | AM689692  |
| <i>Alsophila</i>   | <i>cunninghamii</i>   | AM410211 | AM410339  | <i>Cyathea</i> | <i>gibbosa</i>        | -        | AM410330  | <i>Cyathea</i>          | <i>similis</i>          | AM495794 | AM689693  |
| <i>Alsophila</i>   | <i>dregei</i>         | AM410194 | -         | <i>Cyathea</i> | <i>gigantea</i>       | -        | AY304439  | <i>Cyathea</i>          | <i>sinuata</i>          | AM495795 | AM689694  |
| <i>Alsophila</i>   | <i>ferdinandii</i>    | AM410204 | AM410335  | <i>Cyathea</i> | <i>glauca</i>         | AM495772 | AM689670  | <i>Cyathea</i>          | <i>speciosa</i>         | AM177339 | AM410331  |
| <i>Alsophila</i>   | <i>firma</i>          | AM410207 | -         | <i>Cyathea</i> | <i>gracilis</i>       | AM410217 | AM410345  | <i>Cyathea</i>          | <i>stipularis</i>       | AM410219 | AM410347  |
| <i>Alsophila</i>   | <i>foersteri</i>      | -        | AM410324  | <i>Cyathea</i> | <i>grandifolia</i>    | -        | AM410302  | <i>Cyathea</i>          | <i>tinganensis</i>      | -        | AY304443  |
| <i>Alsophila</i>   | <i>havilandii</i>     | AM410189 | -         | <i>Cyathea</i> | <i>grangaudiana</i>   | AM495774 | AM689672  | <i>Cyathea</i>          | <i>tsangii</i>          | -        | AJ505925  |
| <i>Alsophila</i>   | <i>hooglandii</i>     | -        | AM410306  | <i>Cyathea</i> | <i>hildebrandtii</i>  | AM495798 | AM689697  | <i>Cyathea</i>          | <i>tsaratananensis</i>  | AM495802 | AM689701  |
| <i>Alsophila</i>   | <i>imrayana</i>       | AM410202 | AM410329  | <i>Cyathea</i> | <i>hookeri</i>        | AM495777 | AM689675  | <i>Cyathea</i>          | <i>valdecrenata</i>     | AM410222 | AM410350  |
| <i>Alsophila</i>   | <i>leichhardtiana</i> | AM410215 | AM410343  | <i>Cyathea</i> | <i>horrida</i>        | AM410196 | AM410320  | <i>Cyathea</i>          | <i>viguieri</i>         | AM495803 | AM689702  |
| <i>Alsophila</i>   | <i>nigrolineata</i>   | AM410206 | AM410337  | <i>Cyathea</i> | <i>howeana</i>        | AM410188 | AM410308  | <i>Cyathea</i>          | <i>walkerae</i>         | AM495805 | AM689704  |
| <i>Alsophila</i>   | <i>oosora</i>         | AM410209 | -         | <i>Cyathea</i> | <i>humilis</i>        | AM495778 | AM689676  | <i>Dicksonia</i>        | <i>arborescens</i>      | AM177340 | AM410356  |
| <i>Alsophila</i>   | <i>pachyrrhachis</i>  | AM410186 | AM410305  | <i>Cyathea</i> | <i>karsteniana</i>    | AM410221 | AM410349  | <i>Dicksonia</i>        | <i>fibrosa</i>          | AM177341 | -         |
| <i>Alsophila</i>   | <i>ramispina</i>      | -        | AM410323  | <i>Cyathea</i> | <i>kirkii</i>         | AM495781 | AM689679  | <i>Dicksonia</i>        | <i>gigantea</i>         | AM177342 | AM410357  |
| <i>Alsophila</i>   | <i>salvinii</i>       | AM410184 | AM410300  | <i>Cyathea</i> | <i>klossii</i>        | EU352299 | -         | <i>Dicksonia</i>        | <i>lanata</i>           | AM177343 | AM410358  |
| <i>Alsophila</i>   | <i>smithii</i>        | AM410210 | AM410338  | <i>Cyathea</i> | <i>lastii</i>         | AM495782 | AM689680  | <i>Dicksonia</i>        | <i>squarrosa</i>        | AM177344 | AM410359  |
| <i>Alsophila</i>   | <i>spinulosa</i>      | AM410212 | AM410340  | <i>Cyathea</i> | <i>lepifera</i>       | U05616   | AM689681  | <i>Dicksonia</i>        | <i>thyrsopteroides</i>  | AM177345 | AM410360  |
| <i>Alsophila</i>   | <i>stelligera</i>     | AM410198 | AM410325  | <i>Cyathea</i> | <i>ligulata</i>       | AM495783 | AM689683  | <i>Hymenophyllopsis</i> | <i>dejecta</i>          | AF101301 | -         |
| <i>Alsophila</i>   | <i>tricolor</i>       | AM410199 | AM410326  | <i>Cyathea</i> | <i>longipinnata</i>   | AM495785 | -         | <i>Hymenophyllopsis</i> | <i>hymenophylloides</i> | AF101302 | -         |
| <i>Alsophila</i>   | <i>tryoniana</i>      | AM410208 | -         | <i>Cyathea</i> | <i>macarthurii</i>    | JF950806 | JF950908  | <i>Sphaeropteris</i>    | <i>aeneifolia</i>       | AM410185 | AM410303  |
| <i>Calochlaena</i> | <i>villosa</i>        | AM177327 | AM410354  | <i>Cyathea</i> | <i>madagascarica</i>  | AM495786 | AM689684  | <i>Sphaeropteris</i>    | <i>albifrons</i>        | AM410214 | AM410342  |
| <i>Cnemidaria</i>  | <i>grandifolia</i>    | AM177332 | -         | <i>Cyathea</i> | <i>manniana</i>       | AM495787 | AM689685  | <i>Sphaeropteris</i>    | <i>atrox</i>            | AM410225 | AM410353  |
| <i>Cyathea</i>     | <i>alata</i>          | EF463164 | -         | <i>Cyathea</i> | <i>marattioides</i>   | AM495788 | AM689686  | <i>Sphaeropteris</i>    | <i>auriculifera</i>     | -        | AM410334  |
| <i>Cyathea</i>     | <i>andohahelensis</i> | AM495727 | AM689623  | <i>Cyathea</i> | <i>medullaris</i>     | EF469952 | AM689687  | <i>Sphaeropteris</i>    | <i>brunei</i>           | -        | AM410301  |
| <i>Cyathea</i>     | <i>appendiculata</i>  | AM495728 | AM689624  | <i>Cyathea</i> | <i>melanocaula</i>    | AM495789 | -         | <i>Sphaeropteris</i>    | <i>capitata</i>         | AM410192 | AM410311  |
| <i>Cyathea</i>     | <i>approximata</i>    | AM495729 | AM689625  | <i>Cyathea</i> | <i>melleri</i>        | AM495790 | AM689688  | <i>Sphaeropteris</i>    | <i>celebica</i>         | AM410195 | AM410317  |
| <i>Cyathea</i>     | <i>arborea</i>        | AM177336 | AM689626  | <i>Cyathea</i> | <i>multiflora</i>     | AM410197 | AM410322  | <i>Sphaeropteris</i>    | <i>excelsa</i>          | AM410213 | AM410341  |
| <i>Cyathea</i>     | <i>auriculata</i>     | AM495730 | -         | <i>Cyathea</i> | <i>mutica</i>         | AM410220 | AM410348  | <i>Sphaeropteris</i>    | <i>glauca</i>           | AM410193 | AM410312  |
| <i>Cyathea</i>     | <i>bellisquamata</i>  | AM495733 | AM689629  | <i>Cyathea</i> | <i>myriotricha</i>    | EU751604 | -         | <i>Sphaeropteris</i>    | <i>horrida</i>          | AM410200 | AM410327  |
| <i>Cyathea</i>     | <i>boivinii</i>       | AM495738 | AM689634  | <i>Cyathea</i> | <i>parvula</i>        | AM177338 | AM410319  | <i>Sphaeropteris</i>    | <i>medullaris</i>       | -        | AM410313  |
| <i>Cyathea</i>     | <i>borbonica</i>      | AM495742 | AM689638  | <i>Cyathea</i> | <i>pectinata</i>      | -        | AY304446  | <i>Sphaeropteris</i>    | <i>megalosora</i>       | AM410190 | AM410309  |
| <i>Cyathea</i>     | <i>brevipinna</i>     | JF950805 | JF950907  | <i>Cyathea</i> | <i>perrieriana</i>    | AM495791 | AM689689  | <i>Sphaeropteris</i>    | <i>novaecaledoniae</i>  | -        | AM410333  |
| <i>Cyathea</i>     | <i>caracasana</i>     | AM410223 | AM410351  | <i>Cyathea</i> | <i>poepigii</i>       | AM410201 | AM410328  | <i>Sphaeropteris</i>    | <i>polypoda</i>         | AM410191 | AM410310  |
| <i>Cyathea</i>     | <i>concava</i>        | AM495751 | AM689647  | <i>Cyathea</i> | <i>poolii</i>         | AM495754 | AM689650  | <i>Sphaeropteris</i>    | <i>robusta</i>          | -        | AM410307  |
| <i>Cyathea</i>     | <i>contaminans</i>    | -        | AY304440  | <i>Cyathea</i> | <i>pseudogigantea</i> | -        | AY304441  | <i>Sphaeropteris</i>    | <i>tomentosissima</i>   | -        | AM410304  |
| <i>Cyathea</i>     | <i>costularis</i>     | AM495752 | AM689648  | <i>Cyathea</i> | <i>quadrata</i>       | -        | AM689653  | <i>Trichipteris</i>     | <i>gibbosa</i>          | AM177354 | -         |
| <i>Cyathea</i>     | <i>decrescens</i>     | -        | AM689654  | <i>Cyathea</i> | <i>robertsiana</i>    | AM410216 | AM410344  |                         |                         |          |           |
| <i>Cyathea</i>     | <i>divergens</i>      | AM177337 | AM410321  | <i>Cyathea</i> | <i>robusta</i>        | JF950807 | JF950909  |                         |                         |          |           |



**Table S10** Accession numbers for sequences included in the *Cryptocarya* phylogenetic tree

| Genus                | Species             | trnL- trnF | trnL     |
|----------------------|---------------------|------------|----------|
| <i>Beilschmiedia</i> | <i>brenesii</i>     | AF268702   | -        |
| <i>Beilschmiedia</i> | <i>ovalis</i>       | AF268703   | -        |
| <i>Beilschmiedia</i> | <i>velutina</i>     | AF268704   | -        |
| <i>Cryptocarya</i>   | <i>alba</i>         | JF950904   | JF950883 |
| <i>Cryptocarya</i>   | <i>chinensis</i>    | AF268710   | -        |
| <i>Cryptocarya</i>   | <i>densiflora</i>   | JF950903   | JF950882 |
| <i>Cryptocarya</i>   | <i>gregsonii</i>    | JF950906   | JF950885 |
| <i>Cryptocarya</i>   | <i>natalense</i>    | -          | JF950886 |
| <i>Cryptocarya</i>   | <i>rhodosperma</i>  | AF268711   | -        |
| <i>Cryptocarya</i>   | <i>sclerophylla</i> | AF268712   | -        |
| <i>Cryptocarya</i>   | <i>thouvenotii</i>  | AF232035   | -        |
| <i>Cryptocarya</i>   | <i>triplinervis</i> | JF950905   | JF950884 |
| <i>Potameia</i>      | <i>micrantha</i>    | AF268749   | -        |

**Table S11** Accession numbers for sequences included in the *Dendrobium* phylogenetic tree

| Genus                 | Species                  | ITS Acc. |
|-----------------------|--------------------------|----------|
| <i>Cadetia</i>        | <i>maideniana</i>        | AY239948 |
| <i>Dendrobium</i>     | <i>adae</i>              | EU430371 |
| <i>Dendrobium</i>     | <i>aemulum</i>           | EU430372 |
| <i>Dendrobium</i>     | <i>bifalce</i>           | EU430373 |
| <i>Dendrobium</i>     | <i>callitrophilum</i>    | EU430374 |
| <i>Dendrobium</i>     | <i>canaliculatum</i>     | EU430375 |
| <i>Dendrobium</i>     | <i>carrii</i>            | EU430376 |
| <i>Dendrobium</i>     | <i>ellipsophyllum</i>    | AY239965 |
| <i>Dendrobium</i>     | <i>fairchildae</i>       | AY239966 |
| <i>Dendrobium</i>     | <i>falcorostrum</i>      | EU430377 |
| <i>Dendrobium</i>     | <i>formosum</i>          | AY239967 |
| <i>Dendrobium</i>     | <i>gracilicaule</i>      | EU430382 |
| <i>Dendrobium</i>     | <i>jonesii</i>           | EU430383 |
| <i>Dendrobium</i>     | <i>kingianum</i>         | EU430385 |
| <i>Dendrobium</i>     | <i>lancifolium</i>       | AY239976 |
| <i>Dendrobium</i>     | <i>macrophyllum</i>      | AY239979 |
| <i>Dendrobium</i>     | <i>monophyllum</i>       | EU430387 |
| <i>Dendrobium</i>     | <i>moorei</i>            | EU430388 |
| <i>Dendrobium</i>     | <i>nindii</i>            | AY239985 |
| <i>Dendrobium</i>     | <i>racemosum</i>         | EU430389 |
| <i>Dendrobium</i>     | <i>schoeninum</i>        | EU430390 |
| <i>Dendrobium</i>     | <i>smillieae</i>         | AY239996 |
| <i>Dendrobium</i>     | <i>speciosum</i>         | EU430397 |
| <i>Dendrobium</i>     | <i>tetragonum</i>        | EU430402 |
| <i>Dendrobium</i>     | <i>thysiflorum</i>       | AY240001 |
| <i>Dendrobium</i>     | <i>victoriae-reginae</i> | AY240004 |
| <i>Dendrobium</i>     | <i>violaceum</i>         | AY240005 |
| <i>Diplocaulobium</i> | <i>ischnopetalum</i>     | AY240007 |
| <i>Dockrillia</i>     | <i>linguiforme</i>       | AF321593 |
| <i>Dockrillia</i>     | <i>pugioniformis</i>     | AF321594 |
| <i>Epigeneium</i>     | <i>amplum</i>            | AY240010 |
| <i>Epigeneium</i>     | <i>cymbidioides</i>      | AY240011 |
| <i>Epigeneium</i>     | <i>nakaharaei</i>        | AY240012 |
| <i>Epigeneium</i>     | <i>triflorum</i>         | AY240013 |
| <i>Flickingeria</i>   | <i>comata</i>            | AY240015 |
| <i>Grastidium</i>     | <i>baileyi</i>           | AY240016 |
| <i>Winika</i>         | <i>cunninghamii</i>      | AY240019 |

**Table S12** Accession numbers for sequences included in the *Grammitis* phylogenetic tree

| Genus                  | Species                  | rbcl     | trnL-trnF | Genus              | Species                 | rbcl     | trnL-trnF | Genus                  | Species              | rbcl     | trnL-trnF |
|------------------------|--------------------------|----------|-----------|--------------------|-------------------------|----------|-----------|------------------------|----------------------|----------|-----------|
| <i>Calymmodon</i>      | <i>gracilis</i>          | AY362341 | -         | <i>Grammitis</i>   | <i>haviandii</i>        | EF178619 | EF178652  | <i>Melpomene</i>       | <i>pseudonutans</i>  | AY460657 | -         |
| <i>Calymmodon</i>      | <i>luerssenianus</i>     | AY460618 | -         | <i>Grammitis</i>   | <i>hirtelloides</i>     | AY460641 | -         | <i>Micropolypodium</i> | <i>hyalinum</i>      | AY362344 | -         |
| <i>Ceradenia</i>       | <i>aulaeifolia</i>       | AY460619 | -         | <i>Grammitis</i>   | <i>holttumii</i>        | EF178620 | EF178653  | <i>Micropolypodium</i> | <i>taenifolium</i>   | AY460658 | -         |
| <i>Ceradenia</i>       | <i>jungermanniioides</i> | AY460620 | -         | <i>Grammitis</i>   | <i>hookeri</i>          | AY460642 | EF178655  | <i>Micropolypodium</i> | <i>zurquinum</i>     | AY460659 | -         |
| <i>Ceradenia</i>       | <i>kalbreyeri</i>        | AY460621 | -         | <i>Grammitis</i>   | <i>jagoriana</i>        | EF178622 | EF178656  | <i>Oleandra</i>        | <i>pistillaris</i>   | U05639   | -         |
| <i>Ceradenia</i>       | <i>pilipes</i>           | AY460622 | -         | <i>Grammitis</i>   | <i>knutsfordiana</i>    | AY362342 | EF178658  | <i>Polypodium</i>      | <i>glycyrrhiza</i>   | U21146   | -         |
| <i>Ceradenia</i>       | <i>spixiana</i>          | AY460623 | -         | <i>Grammitis</i>   | <i>kyimbilensis</i>     | EF178624 | EF178659  | <i>Prosaptia</i>       | <i>alata</i>         | AY460660 | -         |
| <i>Chrysogrammitis</i> | <i>musgraveana</i>       | AY460624 | -         | <i>Grammitis</i>   | <i>melanoloma</i>       | AY460643 | -         | <i>Prosaptia</i>       | <i>contigua</i>      | AY362345 | EF178663  |
| <i>Cochlidium</i>      | <i>punctatum</i>         | AY460625 | -         | <i>Grammitis</i>   | <i>nudicarpa</i>        | JF950810 | JF950911  | <i>Prosaptia</i>       | <i>obliquata</i>     | AY460661 | -         |
| <i>Cochlidium</i>      | <i>rostratum</i>         | AY460626 | -         | <i>Grammitis</i>   | <i>padangensis</i>      | EF178625 | EF178660  | <i>Prosaptia</i>       | <i>palauensis</i>    | AY460662 | -         |
| <i>Cochlidium</i>      | <i>seminudum</i>         | AY460627 | -         | <i>Grammitis</i>   | <i>parva</i>            | AY460644 | -         | <i>Prosaptia</i>       | <i>pubipes</i>       | AY460663 | EF178664  |
| <i>Ctenopteris</i>     | <i>aff.repandula</i>     | AY460632 | -         | <i>Grammitis</i>   | <i>poeppigiana</i>      | AY460646 | -         | <i>Scleroglossum</i>   | <i>sulcatum</i>      | AY460664 | -         |
| <i>Ctenopteris</i>     | <i>heterophylla</i>      | AY460628 | -         | <i>Grammitis</i>   | <i>pseudociliata</i>    | AY460645 | -         | <i>Terpsichore</i>     | <i>achilleifolia</i> | AY460666 | -         |
| <i>Ctenopteris</i>     | <i>lasiostipes</i>       | AY460630 | -         | <i>Grammitis</i>   | <i>reinwardtii</i>      | AB232398 | -         | <i>Terpsichore</i>     | <i>alsopteris</i>    | AY460667 | -         |
| <i>Ctenopteris</i>     | <i>nutans</i>            | AY460631 | -         | <i>Grammitis</i>   | <i>reinwardtioides</i>  | EF178626 | EF178661  | <i>Terpsichore</i>     | <i>anfractuosa</i>   | AY460668 | -         |
| <i>Ctenopteris</i>     | <i>repandula</i>         | AY460633 | -         | <i>Grammitis</i>   | <i>tenella</i>          | AF468198 | AF469786  | <i>Terpsichore</i>     | <i>cultrata</i>      | AY460669 | -         |
| <i>Ctenopteris</i>     | <i>rhodocarpa</i>        | AY460634 | -         | <i>Grammitis</i>   | <i>wattsii</i>          | -        | JF950912  | <i>Terpsichore</i>     | <i>eggertii</i>      | AF468209 | AF469798  |
| <i>Davallia</i>        | <i>solida</i>            | AY096193 | -         | <i>Lellingeria</i> | <i>apiculata</i>        | AY362343 | -         | <i>Terpsichore</i>     | <i>hanekeana</i>     | AY460670 | -         |
| <i>Enterosora</i>      | <i>percrassa</i>         | AY460635 | -         | <i>Lellingeria</i> | <i>hirsuta</i>          | AY460649 | -         | <i>Terpsichore</i>     | <i>lanigera</i>      | AY460671 | -         |
| <i>Enterosora</i>      | <i>trifurcata</i>        | AY460636 | -         | <i>Lellingeria</i> | <i>limula</i>           | AY460650 | -         | <i>Terpsichore</i>     | <i>lehmanniana</i>   | AY460673 | -         |
| <i>Grammitis</i>       | <i>aff.holttumii</i>     | EF178621 | EF178654  | <i>Lellingeria</i> | <i>major</i>            | EF178627 | -         | <i>Terpsichore</i>     | <i>longisetosa</i>   | AY460674 | -         |
| <i>Grammitis</i>       | <i>baldwinii</i>         | EF178616 | EF178649  | <i>Lellingeria</i> | <i>pseudomitchellae</i> | AY460652 | -         | <i>Terpsichore</i>     | <i>pichinchae</i>    | AY460675 | -         |
| <i>Grammitis</i>       | <i>billardieri</i>       | AY460637 | -         | <i>Lellingeria</i> | <i>saffordii</i>        | EF178628 | EF178662  | <i>Terpsichore</i>     | <i>semihirsuta</i>   | AY460676 | -         |
| <i>Grammitis</i>       | <i>bryophila</i>         | AF468208 | AF469797  | <i>Lellingeria</i> | <i>schenckei</i>        | AY460651 | -         | <i>Terpsichore</i>     | <i>senilis</i>       | AY096208 | -         |
| <i>Grammitis</i>       | <i>ciliata</i>           | AY460638 | -         | <i>Lellingeria</i> | <i>sp.</i>              | EF178630 | -         | <i>Terpsichore</i>     | <i>sp.</i>           | AY460679 | -         |
| <i>Grammitis</i>       | <i>congener</i>          | EF178617 | EF178650  | <i>Lellingeria</i> | <i>sp.</i>              | EF178631 | -         | <i>Terpsichore</i>     | <i>subscabra</i>     | AY460677 | -         |
| <i>Grammitis</i>       | <i>deplanchei</i>        | AY460639 | -         | <i>Lellingeria</i> | <i>subcoriacea</i>      | EF178629 | -         | <i>Terpsichore</i>     | <i>subtilis</i>      | AY460678 | -         |
| <i>Grammitis</i>       | <i>diminuta</i>          | JF950809 | JF950910  | <i>Lellingeria</i> | <i>subsessilis</i>      | AY460653 | -         | <i>Themelium</i>       | <i>tenuisectum</i>   | AY362346 | -         |
| <i>Grammitis</i>       | <i>dolichosora</i>       | EF178618 | -         | <i>Melpomene</i>   | <i>flabelliformis</i>   | AY460656 | -         | <i>Xiphopteris</i>     | <i>conjunctisora</i> | AY460680 | -         |
| <i>Grammitis</i>       | <i>forbesiana</i>        | AY460640 | EF178651  | <i>Melpomene</i>   | <i>moniliformis</i>     | AY460654 | -         |                        |                      |          |           |

**Table S13** Accession numbers for sequences included in the *Doodia* phylogenetic tree

| Genus             | Species            | rbcL     | trnL+trnL-trnF |
|-------------------|--------------------|----------|----------------|
| <i>Blechnum</i>   | <i>brasiliense</i> | AB040545 | DQ683436       |
| <i>Blechnum</i>   | <i>fraseri</i>     | AB040553 | DQ683390       |
| <i>Blechnum</i>   | <i>patersonii</i>  | AB040569 | DQ683406       |
| <i>Blechnum</i>   | <i>spicant</i>     | AB040571 | EF427640       |
| <i>Doodia</i>     | <i>aspera</i>      | AB040577 | DQ683420       |
| <i>Doodia</i>     | <i>australis</i>   | -        | DQ683423       |
| <i>Doodia</i>     | <i>kunthiana</i>   | AB040578 | DQ683424       |
| <i>Doodia</i>     | <i>maxima</i>      | DMU05921 | -              |
| <i>Doodia</i>     | <i>media</i>       | DMU05922 | -              |
| <i>Doodia</i>     | <i>milnei</i>      | -        | DQ683426       |
| <i>Doodia</i>     | <i>mollis</i>      | AB040579 | DQ683428       |
| <i>Doodia</i>     | <i>squarrosa</i>   | AB040580 | DQ683430       |
| <i>Sadleria</i>   | <i>cyatheoides</i> | AF425103 | DQ683431       |
| <i>Woodwardia</i> | <i>japonica</i>    | AY137664 | DQ683432       |
| <i>Woodwardia</i> | <i>prolifera</i>   | AY137666 | DQ683433       |
| <i>Woodwardia</i> | <i>radicans</i>    | AY137667 | DQ683434       |
| <i>Doodia</i>     | <i>caudata</i>     | JF950808 | JF950941       |

**Table S14** Accession numbers for sequences included in the *Geniostoma* phylogenetic tree

| Genus             | Species               | ITS      | trnL     | trnL-trnF |
|-------------------|-----------------------|----------|----------|-----------|
| <i>Exacum</i>     | <i>appendiculatum</i> | FJ666036 | FJ014140 | FJ013957  |
| <i>Exacum</i>     | <i>exiguum</i>        | FJ666037 | FJ014142 | FJ013960  |
| <i>Gardneria</i>  | <i>ovata</i>          | -        | AF102427 | AF102427  |
| <i>Geniostoma</i> | <i>rupestre</i>       | DQ499096 | AF102430 | -         |
| <i>Geniostoma</i> | <i>rupestre</i>       | DQ499095 | -        | -         |
| <i>Geniostoma</i> | <i>angustifolium</i>  | JF950767 | JF950887 | JF950913  |
| <i>Geniostoma</i> | <i>petiolosum</i>     | JF950768 | JF950888 | JF950914  |
| <i>Geniostoma</i> | <i>borbonicum</i>     | JF950769 | JF950889 | JF950915  |
| <i>Geniostoma</i> | <i>huttonii</i>       | JF950770 | JF950890 | JF950916  |
| <i>Labordia</i>   | <i>tinifolia</i>      | -        | AF102447 | -         |
| <i>Logania</i>    | <i>albiflora</i>      | DQ358879 | AF102451 | -         |
| <i>Mitrasacme</i> | <i>pilosa</i>         | -        | AF102459 | -         |
| <i>Nerium</i>     | <i>oleander</i>       | -        | DQ221125 | DQ221167  |
| <i>Spigelia</i>   | <i>hedyotidea</i>     | AF178007 | -        | -         |
| <i>Spigelia</i>   | <i>texana</i>         | AF178006 | -        | -         |

**Table S15** Accession numbers for sequences included in the *Hymenophyllum* phylogenetic tree

| Genus                | Species              | rbcl     | rps4     | Genus                 | Species                  | rbcl     | rps4     |
|----------------------|----------------------|----------|----------|-----------------------|--------------------------|----------|----------|
| <i>Abrodictyum</i>   | <i>rigidum</i>       | AY095108 | AY095137 | <i>Hymenophyllum</i>  | <i>leratii</i>           | AB191448 | AY775421 |
| <i>Crepidomanes</i>  | <i>latealatum</i>    | AB083291 | -        | <i>Hymenophyllum</i>  | <i>lyallii</i>           | AB162684 | -        |
| <i>Crepidomanes</i>  | <i>thysanostomum</i> | AB083294 | -        | <i>Hymenophyllum</i>  | <i>marginatum</i>        | AB162692 | AY775409 |
| <i>Didymoglossum</i> | <i>baileyianum</i>   | AF275643 | AY095129 | <i>Hymenophyllum</i>  | <i>microcarpum</i>       | AB083289 | -        |
| <i>Didymoglossum</i> | <i>cuspidatum</i>    | AF537122 | AY095144 | <i>Hymenophyllum</i>  | <i>mniooides</i>         | AB217849 | DQ077944 |
| <i>Dipteris</i>      | <i>conjugata</i>     | U05620   | -        | <i>Hymenophyllum</i>  | <i>moorei</i>            | JF950812 | JF950816 |
| <i>Gleichenia</i>    | <i>dicarpa</i>       | AF313584 | -        | <i>Hymenophyllum</i>  | <i>nitidulum</i>         | AB162683 | -        |
| <i>Hymenophyllum</i> | <i>acanthoides</i>   | AB083282 | AY775434 | <i>Hymenophyllum</i>  | <i>oligosorum</i>        | AB083280 | AY775422 |
| <i>Hymenophyllum</i> | <i>apiculatum</i>    | AF275642 | AY095131 | <i>Hymenophyllum</i>  | <i>ooides</i>            | AB191449 | -        |
| <i>Hymenophyllum</i> | <i>armstrongii</i>   | AB162691 | AY095128 | <i>Hymenophyllum</i>  | <i>pallidum</i>          | EU338467 | AY775431 |
| <i>Hymenophyllum</i> | <i>australe</i>      | AB191439 | AY775412 | <i>Hymenophyllum</i>  | <i>palmatifidum</i>      | AB162682 | -        |
| <i>Hymenophyllum</i> | <i>barbatum</i>      | AB083283 | AY095124 | <i>Hymenophyllum</i>  | <i>paniense</i>          | AB083275 | AY775410 |
| <i>Hymenophyllum</i> | <i>braithwaitii</i>  | AB162686 | -        | <i>Hymenophyllum</i>  | <i>pectinatum</i>        | AB191450 | AY095134 |
| <i>Hymenophyllum</i> | <i>caespitosa</i>    | AB191456 | AY095130 | <i>Hymenophyllum</i>  | <i>pilosissimum</i>      | AB083287 | -        |
| <i>Hymenophyllum</i> | <i>caudiculatum</i>  | AB191442 | AY775414 | <i>Hymenophyllum</i>  | <i>polyanthos</i>        | EU122986 | AY775425 |
| <i>Hymenophyllum</i> | <i>cf_ acutum</i>    | AB257473 | -        | <i>Hymenophyllum</i>  | <i>pulcherrimum</i>      | AB191451 | AY775426 |
| <i>Hymenophyllum</i> | <i>corrugatum</i>    | AB191443 | -        | <i>Hymenophyllum</i>  | <i>rarum</i>             | AB217845 | -        |
| <i>Hymenophyllum</i> | <i>cruentum</i>      | AB191455 | AY095133 | <i>Hymenophyllum</i>  | <i>reniforme</i>         | AB083290 | AY095132 |
| <i>Hymenophyllum</i> | <i>cuneatum</i>      | AY775401 | AY775415 | <i>Hymenophyllum</i>  | <i>rolandi-principis</i> | AB083286 | AY095143 |
| <i>Hymenophyllum</i> | <i>demissum</i>      | AY775402 | AY775416 | <i>Hymenophyllum</i>  | <i>sanguinolentum</i>    | AB191452 | AY775427 |
| <i>Hymenophyllum</i> | <i>deplanchei</i>    | AB083284 | AY095136 | <i>Hymenophyllum</i>  | <i>scabrum</i>           | AB083278 | AY775428 |
| <i>Hymenophyllum</i> | <i>digitatum</i>     | EU122980 | -        | <i>Hymenophyllum</i>  | <i>secundum</i>          | AF275648 | AY095125 |
| <i>Hymenophyllum</i> | <i>dilatatum</i>     | AB191444 | AY095138 | <i>Hymenophyllum</i>  | <i>sibthorpioides</i>    | AB162688 | AY095127 |
| <i>Hymenophyllum</i> | <i>dimidiatum</i>    | AB064289 | AY775433 | <i>Hymenophyllum</i>  | <i>subdimidiatum</i>     | AB083281 | AY095140 |
| <i>Hymenophyllum</i> | <i>exiguum</i>       | AB257488 | -        | <i>Hymenophyllum</i>  | <i>subobtusum</i>        | AB083288 | -        |
| <i>Hymenophyllum</i> | <i>ferrugineum</i>   | AB191445 | AF537124 | <i>Hymenophyllum</i>  | <i>taeniatum</i>         | EU122987 | -        |
| <i>Hymenophyllum</i> | <i>flabellatum</i>   | EU122981 | AY775417 | <i>Hymenophyllum</i>  | <i>tenellum</i>          | AB191453 | AY095126 |
| <i>Hymenophyllum</i> | <i>flexuosum</i>     | AB217850 | DQ077943 | <i>Hymenophyllum</i>  | <i>tunbrigense</i>       | EU553547 | AY095123 |
| <i>Hymenophyllum</i> | <i>frankliniae</i>   | AB162690 | -        | <i>Hymenophyllum</i>  | <i>villosum</i>          | AB191454 | AY775429 |
| <i>Hymenophyllum</i> | <i>fuciforme</i>     | AB191446 | AY775418 | <i>Hymenophyllum</i>  | <i>wrightii</i>          | AB083277 | AY775430 |
| <i>Hymenophyllum</i> | <i>fucoides</i>      | U20933   | AY095142 | <i>Phanerosorus</i>   | <i>sarmentosus</i>       | AF313583 | -        |
| <i>Hymenophyllum</i> | <i>fuscum</i>        | AB083285 | AY775408 | <i>Polyphlebium</i>   | <i>diaphanum</i>         | AB083292 | AY775413 |
| <i>Hymenophyllum</i> | <i>heimii</i>        | AY775404 | AY775419 | <i>Stromatopteris</i> | <i>moniliformis</i>      | AY612685 | AY095120 |
| <i>Hymenophyllum</i> | <i>hirsutum</i>      | AY775407 | AY775432 | <i>Trichomanes</i>    | <i>badium</i>            | AB191440 | AY095141 |
| <i>Hymenophyllum</i> | <i>howense</i>       | JF950811 | JF950815 | <i>Trichomanes</i>    | <i>elegans</i>           | AB083295 | -        |
| <i>Hymenophyllum</i> | <i>hygrometricum</i> | AY095113 | AY095118 | <i>Trichomanes</i>    | <i>taeniatum</i>         | AF275651 | AY095121 |
| <i>Hymenophyllum</i> | <i>inaequale</i>     | AY095112 | AY095122 | <i>Vandenboschia</i>  | <i>birmanica</i>         | AB083293 | -        |
| <i>Hymenophyllum</i> | <i>javanicum</i>     | AB191447 | DQ077945 | <i>Abrodictyum</i>    | <i>tamarisciforme</i>    | -        | AY095135 |
| <i>Hymenophyllum</i> | <i>lanceolatum</i>   | AF275646 | AY095119 |                       |                          |          |          |

**Table S16** Accession numbers for sequences included in the *Korthalsella* phylogenetic tree

| Genus               | Species               | ITS      | trnL +<br>trnL-trnF |
|---------------------|-----------------------|----------|---------------------|
| <i>Korthalsella</i> | <i>clavata</i>        | -        | AF055680            |
| <i>Korthalsella</i> | <i>complanata</i>     | AF051966 | AF055688            |
| <i>Korthalsella</i> | <i>cylindrica</i>     | AF051959 | -                   |
| <i>Korthalsella</i> | <i>emersa</i>         | JF950771 | JF950942            |
| <i>Korthalsella</i> | <i>japonica</i>       | AF051971 | AF055696            |
| <i>Korthalsella</i> | <i>latissima</i>      | AF051965 | AF055687            |
| <i>Korthalsella</i> | <i>lindsayi</i>       | AF051954 | AF055676            |
| <i>Korthalsella</i> | <i>papuana</i>        | AF051951 | AF055673            |
| <i>Korthalsella</i> | <i>platycaula</i>     | AF051963 | AF055685            |
| <i>Korthalsella</i> | <i>remyana</i>        | AF051961 | AF055681            |
| <i>Korthalsella</i> | <i>rubra</i>          | JF950772 | JF950891            |
| <i>Korthalsella</i> | <i>salicornioides</i> | AF051952 | AF055674            |
| <i>Phoradendron</i> | <i>hipsalinum</i>     | AF178719 | -                   |
| <i>Phoradendron</i> | <i>robinsonii</i>     | AF178718 | -                   |
| <i>Viscum</i>       | <i>album</i>          | EU796892 | -                   |
| <i>Viscum</i>       | <i>cruciatum</i>      | AF180532 | -                   |

**Table S17** Accession numbers for sequences included in the *Macropiper* phylogenetic tree

| Genus             | Species               | ITS Acc. |
|-------------------|-----------------------|----------|
| <i>Macropiper</i> | <i>excelsum</i>       | AF275193 |
| <i>Macropiper</i> | <i>excelsum</i>       | JF950773 |
| <i>Macropiper</i> | <i>hooglandii</i>     | AF275192 |
| <i>Macropiper</i> | <i>melanostachyum</i> | EF635465 |
| <i>Macropiper</i> | <i>melchior</i>       | DQ868759 |
| <i>Macropiper</i> | <i>puberulum</i>      | AF275191 |
| <i>Macropiper</i> | <i>timothianum</i>    | DQ868761 |
| <i>Peperomia</i>  | <i>metallica</i>      | DQ868762 |
| <i>Peperomia</i>  | <i>reptilis</i>       | FJ424438 |
| <i>Peperomia</i>  | <i>tristachya</i>     | FJ424439 |
| <i>Macropiper</i> | <i>latifolium</i>     | FJ424440 |
| <i>Piper</i>      | <i>macropiper</i>     | EF060074 |
| <i>Piper</i>      | <i>stipulare</i>      | DQ868746 |
| <i>Piper</i>      | <i>sylvaticum</i>     | DQ868748 |
| <i>Piper</i>      | <i>thomsonii</i>      | DQ868749 |
| <i>Piper</i>      | <i>tricolor</i>       | DQ868750 |
| <i>Piper</i>      | <i>vitiense</i>       | DQ868752 |

**Table S18** Accession numbers for sequences included in the *Melicope* phylogenetic tree

| Genus                | Species                | trnL     | trnL-trnF | ITS      |
|----------------------|------------------------|----------|-----------|----------|
| <i>Acronychia</i>    | <i>oblongifolia</i>    | EU493242 | EU493242  | EU493185 |
| <i>Euodia</i>        | <i>hortensis</i>       | DQ225966 | DQ225898  | DQ225812 |
| <i>Euodia</i>        | <i>hupehensis</i>      | EF489253 | EF489253  | DQ225814 |
| <i>Euodia</i>        | <i>hylandii</i>        | DQ225964 | DQ225964  | EU493186 |
| <i>Euodia</i>        | <i>pubifolia</i>       | EU493243 | EU493243  | -        |
| <i>Melicope</i>      | <i>bonwickii</i>       | DQ225958 | -         | DQ225809 |
| <i>Melicope</i>      | <i>cf. crassiramis</i> | -        | -         | DQ499138 |
| <i>Melicope</i>      | <i>clusiifolia</i>     | EU493235 | EU493235  | EU493178 |
| <i>Melicope</i>      | <i>contermina</i>      | JF950892 | JF950892  | JF950774 |
| <i>Melicope</i>      | <i>degeneri</i>        | EU493236 | EU493236  | EU493179 |
| <i>Melicope</i>      | <i>elleryana</i>       | EU493241 | EU493241  | EU493184 |
| <i>Melicope</i>      | <i>elliptica</i>       | EU493237 | EU493237  | EU493180 |
| <i>Melicope</i>      | <i>hivaoaensis</i>     | EU493230 | EU493230  | EU493173 |
| <i>Melicope</i>      | <i>inopinata</i>       | EU493233 | EU493233  | EU493176 |
| <i>Melicope</i>      | <i>knudsenii</i>       | EU493225 | EU493225  | EU493168 |
| <i>Melicope</i>      | <i>lucida</i>          | EU493234 | EU493234  | EU493177 |
| <i>Melicope</i>      | <i>nukuhivensis</i>    | EU493232 | EU493232  | EU493175 |
| <i>Melicope</i>      | <i>ovalis</i>          | EU493226 | EU493226  | EU493169 |
| <i>Melicope</i>      | <i>paniculata</i>      | EU493228 | EU493228  | EU493171 |
| <i>Melicope</i>      | <i>polybotrya</i>      | JF950893 | JF950893  | JF950775 |
| <i>Melicope</i>      | <i>pteleifolia</i>     | DQ225960 | -         | DQ225806 |
| <i>Melicope</i>      | <i>puberula</i>        | EU493229 | EU493229  | EU493172 |
| <i>Melicope</i>      | <i>quadrangularis</i>  | EU493227 | EU493227  | EU493170 |
| <i>Melicope</i>      | <i>revoluta</i>        | EU493231 | EU493231  | EU493174 |
| <i>Melicope</i>      | <i>rubra</i>           | DQ225957 | DQ225893  | DQ225807 |
| <i>Melicope</i>      | <i>simplex</i>         | -        | -         | DQ499137 |
| <i>Melicope</i>      | <i>sp.</i>             | EF489255 | EF489255  | -        |
| <i>Melicope</i>      | <i>sp. Chase</i>       | EU853807 | EU853807  | -        |
| <i>Melicope</i>      | <i>ternata</i>         | EU853808 | EU853808  | DQ225805 |
| <i>Melicope</i>      | <i>triphylla</i>       | DQ225961 | DQ225894  | -        |
| <i>Melicope</i>      | <i>vitiflora</i>       | DQ225962 | DQ225895  | DQ225811 |
| <i>Platydesma</i>    | <i>rostrata</i>        | EU493238 | EU493238  | EU493181 |
| <i>Platydesma</i>    | <i>spathulata</i>      | EU493239 | EU493239  | EU493182 |
| <i>Sarcomelicope</i> | <i>simplicifolia</i>   | EU853816 | EU853816  | -        |
| <i>Skimmia</i>       | <i>japonica</i>        | EU853819 | EU853819  | -        |
| <i>Spathelia</i>     | <i>excelsa</i>         | EU853820 | EU853820  | -        |
| <i>Triphasia</i>     | <i>trifolia</i>        | EU853822 | EU853822  | -        |

**Table S19** Accession numbers for sequences included in the *Metrosideros* phylogenetic tree

| Genus               | Species                | ETS      | ITS      | 5S       | rps16    | trnL-trnF | Genus               | Species                      | ETS      | ITS      | 5S       | rps16    | trnL-trnF |
|---------------------|------------------------|----------|----------|----------|----------|-----------|---------------------|------------------------------|----------|----------|----------|----------|-----------|
| <i>Callistemon</i>  | <i>comboynensis</i>    | AM489897 | AM234140 | -        | -        | -         | <i>Metrosideros</i> | <i>nervulosa</i>             | JF950713 | JF950783 | JF950701 | JF950873 | JF950928  |
| <i>Cloezia</i>      | <i>floribunda</i>      | AY606255 | AF172767 | -        | -        | -         | <i>Metrosideros</i> | <i>nervulosa</i>             | JF950714 | JF950784 | JF950702 | JF950874 | JF950929  |
| <i>Eucalyptus</i>   | <i>perriniana</i>      | AM489907 | AM234139 | -        | -        | -         | <i>Metrosideros</i> | <i>nitida</i>                | -        | AF172770 | -        | -        | -         |
| <i>Leptospermum</i> | <i>scoparium</i>       | AM489922 | AM234142 | -        | -        | -         | <i>Metrosideros</i> | <i>ochrantha</i>             | -        | AF172748 | -        | -        | -         |
| <i>Metrosideros</i> | <i>albiflora</i>       | AY606241 | DQ328799 | -        | -        | -         | <i>Metrosideros</i> | <i>operculata</i>            | AY606246 | AF172733 | -        | -        | -         |
| <i>Metrosideros</i> | <i>angustifolia</i>    | AY606231 | DQ328795 | -        | -        | -         | <i>Metrosideros</i> | <i>oreomyrtus</i>            | -        | AF172749 | -        | -        | -         |
| <i>Metrosideros</i> | <i>bartlettii</i>      | AF328046 | AF172740 | -        | -        | -         | <i>Metrosideros</i> | <i>ovata</i>                 | AY606232 | DQ328793 | -        | -        | -         |
| <i>Metrosideros</i> | <i>boninensis</i>      | -        | AF172734 | JF950693 | -        | JF950917  | <i>Metrosideros</i> | <i>paniensis</i>             | AY606247 | AF211503 | -        | -        | -         |
| <i>Metrosideros</i> | <i>brevistylis</i>     | AY606237 | AF211496 | -        | -        | -         | <i>Metrosideros</i> | <i>parkinsonii</i>           | AY606248 | DQ328796 | -        | -        | -         |
| <i>Metrosideros</i> | <i>cacuminum</i>       | AY606238 | AF211497 | -        | -        | -         | <i>Metrosideros</i> | <i>patens</i>                | AY606249 | AF211504 | -        | -        | -         |
| <i>Metrosideros</i> | <i>carminea</i>        | AY606243 | AF211498 | -        | -        | JF950918  | <i>Metrosideros</i> | <i>perforata</i>             | AM489931 | AM234141 | -        | -        | -         |
| <i>Metrosideros</i> | <i>cherrieri</i>       | -        | AF172768 | -        | -        | -         | <i>Metrosideros</i> | <i>polymorpha dieteri</i>    | AF328057 | AF172750 | -        | EU605432 | -         |
| <i>Metrosideros</i> | <i>colensoi</i>        | AY606242 | AF211499 | -        | -        | -         | <i>Metrosideros</i> | <i>polymorpha glaberrima</i> | AF328059 | AF172751 | -        | EU605472 | -         |
| <i>Metrosideros</i> | <i>collina</i>         |          |          |          |          |           | <i>Metrosideros</i> | <i>polymorpha incana</i>     |          |          |          |          |           |
| <i>Metrosideros</i> | <i>fruticosa</i>       | AF328066 | AF172756 | -        | EU605373 | -         | <i>Metrosideros</i> | <i>polymorpha polymorpha</i> | AF328058 | AF172752 | -        | EU605448 | -         |
| <i>Metrosideros</i> | <i>collina collina</i> | AF328068 | AF328069 | -        | EU605473 | -         | <i>Metrosideros</i> | <i>polymorpha polymorpha</i> | AF328055 | AF172753 | -        | EU605456 | -         |
| <i>Metrosideros</i> | <i>collina collina</i> | AF328063 | AF172741 | -        | -        | -         | <i>Metrosideros</i> | <i>polymorpha pumila</i>     | AF328056 | AF172754 | -        | EU605470 | -         |
| <i>Metrosideros</i> | <i>collina collina</i> | AF328067 | AF328070 | -        | EU605372 | -         | <i>Metrosideros</i> | <i>porphyrea</i>             | AY606251 | AF211505 | -        | -        | -         |
| <i>Metrosideros</i> | <i>collina collina</i> | AF328064 | AF172737 | -        | -        | -         | <i>Metrosideros</i> | <i>punctata</i>              | -        | AF172755 | -        | -        | -         |
| <i>Metrosideros</i> | <i>collina collina</i> | AF328065 | AF172735 | JF950694 | -        | JF950919  | <i>Metrosideros</i> | <i>ramiflora</i>             | AY606235 | DQ328798 | -        | -        | -         |
| <i>Metrosideros</i> | <i>collina villosa</i> | AF328061 | AF172742 | -        | -        | -         | <i>Metrosideros</i> | <i>robusta</i>               | AF328048 | AF172758 | -        | -        | -         |
| <i>Metrosideros</i> | <i>cordata</i>         | AY606240 | JF950776 | -        | -        | -         | <i>Metrosideros</i> | <i>rotundifolia</i>          | AY606253 | AF211507 | -        | -        | -         |
| <i>Metrosideros</i> | <i>diffusa</i>         | AY606236 | AF211500 | -        | -        | JF950920  | <i>Metrosideros</i> | <i>rugosa</i>                | AF328060 | AF172759 | -        | EU605460 | -         |
| <i>Metrosideros</i> | <i>dolichandra</i>     | AY606239 | AF211501 | -        | -        | -         | <i>Metrosideros</i> | <i>cf. salomonensis</i>      | AY606254 | DQ328801 | -        | -        | -         |
| <i>Metrosideros</i> | <i>engleriana</i>      | -        | AF172736 | -        | -        | -         | <i>Metrosideros</i> | <i>sclerocarpa</i>           | JF950715 | JF950785 | JF950703 | JF950875 | JF950930  |
| <i>Metrosideros</i> | <i>excelsa</i>         | JF950707 | JF950777 | JF950695 | JF950868 | JF950921  | <i>Metrosideros</i> | <i>sclerocarpa</i>           | JF950716 | JF950786 | JF950704 | JF950876 | JF950931  |
| <i>Metrosideros</i> | <i>fulgens</i>         | AY606244 | DQ328800 | -        | -        | -         | <i>Metrosideros</i> | <i>sclerocarpa</i>           | JF950717 | JF950787 | JF950705 | JF950877 | JF950932  |
| <i>Metrosideros</i> | <i>gregoryi</i>        | -        | AF172769 | -        | -        | -         | <i>Metrosideros</i> | <i>sclerocarpa</i>           | JF950718 | JF950788 | JF950706 | JF950878 | JF950933  |
| <i>Metrosideros</i> | <i>halconensis</i>     | AY606234 | DQ328797 | -        | -        | -         | <i>Metrosideros</i> | <i>sepikensis</i>            | -        | JF950789 | -        | -        | JF950934  |
| <i>Metrosideros</i> | <i>humboldtiana</i>    | -        | AF172744 | -        | -        | -         | <i>Metrosideros</i> | <i>sp.</i>                   | -        | AF172761 | -        | -        | -         |
| <i>Metrosideros</i> | <i>kermadecensis</i>   | JF950708 | JF950778 | JF950696 | JF950869 | JF950922  | <i>Metrosideros</i> | <i>tetrasticha</i>           | -        | AF172762 | -        | -        | -         |
| <i>Metrosideros</i> | <i>kermadecensis</i>   | JF950709 | JF950779 | JF950697 | JF950870 | JF950923  | <i>Metrosideros</i> | <i>tremuloides</i>           | AF328053 | AF172763 | -        | EU605400 | -         |
| <i>Metrosideros</i> | <i>kermadecensis</i>   | JF950710 | JF950780 | JF950698 | -        | JF950924  | <i>Metrosideros</i> | <i>umbellata</i>             | -        | AF172764 | -        | -        | -         |
| <i>Metrosideros</i> | <i>longipetiolata</i>  | AY606245 | AF211502 | -        | -        | -         | <i>Metrosideros</i> | <i>waialealae</i>            | AF328054 | AF172765 | -        | EU605440 | -         |
| <i>Metrosideros</i> | <i>macropus</i>        | AF328052 | AF172745 | -        | EU605396 | JF950925  | <i>Metrosideros</i> | <i>whitakeri</i>             | AY606252 | AF211506 | -        | -        | -         |
| <i>Metrosideros</i> | <i>microphylla</i>     | -        | AF172746 | -        | -        | -         | <i>Metrosideros</i> | <i>whiteana</i>              | AY606233 | DQ328794 | -        | -        | -         |
| <i>Metrosideros</i> | <i>nervulosa</i>       | JF950711 | JF950781 | JF950699 | JF950871 | JF950926  | <i>Tepualia</i>     | <i>stipularis</i>            | AM489969 | AM234071 | -        | -        | -         |
| <i>Metrosideros</i> | <i>nervulosa</i>       | JF950712 | JF950782 | JF950700 | JF950872 | JF950927  |                     |                              |          |          |          |          |           |

**Table S20** Accession numbers for sequences included in the *Olearia* phylogenetic tree

| Genus                | Species              | ITS      | Genus          | Species               | ITS      |
|----------------------|----------------------|----------|----------------|-----------------------|----------|
| <i>Achillea</i>      | <i>millefolium</i>   | AF046939 | <i>Olearia</i> | <i>cordata</i>        | AF497668 |
| <i>Achnophora</i>    | <i>tatei</i>         | AF497656 | <i>Olearia</i> | <i>covenyi</i>        | AF497711 |
| <i>Artemisia</i>     | <i>rupestris</i>     | AJ297261 | <i>Olearia</i> | <i>elliptica_1</i>    | JF950796 |
| <i>Aster</i>         | <i>novi-belgii</i>   | AF497657 | <i>Olearia</i> | <i>elliptica_2</i>    | AF497669 |
| <i>Brachyscome</i>   | <i>heterodonta</i>   | AF046955 | <i>Olearia</i> | <i>ferresii</i>       | AF497676 |
| <i>Brachyscome</i>   | <i>humilis</i>       | AF422113 | <i>Olearia</i> | <i>flocktoniae</i>    | AF497679 |
| <i>Brachyscome</i>   | <i>multifida</i>     | AF497658 | <i>Olearia</i> | <i>floribunda</i>     | AF497680 |
| <i>Calotis</i>       | <i>cuneifolia</i>    | AF497647 | <i>Olearia</i> | <i>furfuracea</i>     | AF497690 |
| <i>Camptacra</i>     | <i>barbata</i>       | AF247070 | <i>Olearia</i> | <i>glulosa</i>        | AF497682 |
| <i>Camptacra</i>     | <i>gracilis</i>      | AF247069 | <i>Olearia</i> | <i>lasiophylla</i>    | AF497652 |
| <i>Celmisia</i>      | <i>asteliifolia</i>  | AF497702 | <i>Olearia</i> | <i>ledifolia</i>      | AF497686 |
| <i>Celmisia</i>      | <i>mackaui</i>       | AF422115 | <i>Olearia</i> | <i>magniflora</i>     | AF497665 |
| <i>Celmisia</i>      | <i>tomentella</i>    | AF497704 | <i>Olearia</i> | <i>megalophylla</i>   | AF497707 |
| <i>Chilotrichum</i>  | <i>diffusum</i>      | AF046945 | <i>Olearia</i> | <i>microphylla</i>    | AF497671 |
| <i>Chrysanthemum</i> | <i>nankingense</i>   | AF314604 | <i>Olearia</i> | <i>mooneyi</i>        | JF950797 |
| <i>Cotula</i>        | <i>coronopifolia</i> | AF422118 | <i>Olearia</i> | <i>muellerii</i>      | AF497666 |
| <i>Damnania</i>      | <i>vernica</i>       | AF422119 | <i>Olearia</i> | <i>mysinoides</i>     | AF497708 |
| <i>Dendranthema</i>  | <i>xgriflorum</i>    | AF116239 | <i>Olearia</i> | <i>nernstii</i>       | AF497654 |
| <i>Erigeron</i>      | <i>byei</i>          | AF046974 | <i>Olearia</i> | <i>nummularifolia</i> | AF497688 |
| <i>Erigeron</i>      | <i>nitidus</i>       | AF497659 | <i>Olearia</i> | <i>oppositifolia</i>  | AF497709 |
| <i>Felicia</i>       | <i>aethiopica</i>    | AF046941 | <i>Olearia</i> | <i>paniculata</i>     | AF497689 |
| <i>Grangea</i>       | <i>maderaspatana</i> | AF046951 | <i>Olearia</i> | <i>pannosa</i>        | AF247065 |
| <i>Kippistia</i>     | <i>suaedifolia</i>   | AF497660 | <i>Olearia</i> | <i>passerinoides</i>  | AF497672 |
| <i>Lagenifera</i>    | <i>panamensis</i>    | AF046965 | <i>Olearia</i> | <i>phlogopappa</i>    | AF497655 |
| <i>Lagenifera</i>    | <i>pumila</i>        | AF422124 | <i>Olearia</i> | <i>picridifolia</i>   | AF497683 |
| <i>Minuria</i>       | <i>cunninghamii</i>  | AF247072 | <i>Olearia</i> | <i>pimeleoides</i>    | AF497673 |
| <i>Minuria</i>       | <i>integerrima</i>   | AF247074 | <i>Olearia</i> | <i>ramosissima</i>    | AF497674 |
| <i>Minuria</i>       | <i>sp.</i>           | AF247077 | <i>Olearia</i> | <i>ramulosa</i>       | DQ479033 |
| <i>Olearia</i>       | <i>albida</i>        | AF497687 | <i>Olearia</i> | <i>rani</i>           | AF497692 |
| <i>Olearia</i>       | <i>angustifolia</i>  | EU169118 | <i>Olearia</i> | <i>rosmarinifolia</i> | AF497706 |
| <i>Olearia</i>       | <i>arborescens</i>   | AF497691 | <i>Olearia</i> | <i>rudis</i>          | AF497677 |
| <i>Olearia</i>       | <i>argophylla</i>    | AF247064 | <i>Olearia</i> | <i>semidentata</i>    | EF660541 |
| <i>Olearia</i>       | <i>arguta</i>        | AF497661 | <i>Olearia</i> | <i>solri</i>          | EF635483 |
| <i>Olearia</i>       | <i>astroloba</i>     | AF497646 | <i>Olearia</i> | <i>sp.</i>            | AF497693 |
| <i>Olearia</i>       | <i>ballii</i>        | JF950795 | <i>Olearia</i> | <i>stellulata</i>     | AF497653 |
| <i>Olearia</i>       | <i>calcarea</i>      | AF497663 | <i>Olearia</i> | <i>stuartii</i>       | AF497678 |
| <i>Olearia</i>       | <i>chathamica</i>    | EF660540 | <i>Olearia</i> | <i>teretifolia</i>    | AF497675 |
| <i>Olearia</i>       | <i>cheesmanii</i>    | AF422130 | <i>Olearia</i> | <i>tomentosa</i>      | AF497650 |
| <i>Olearia</i>       | <i>chrysophylla</i>  | AF497710 | <i>Olearia</i> | <i>traversii</i>      | AF497695 |
| <i>Olearia</i>       | <i>ciliata</i>       | AF497667 | <i>Olearia</i> | <i>virgata</i>        | EF635481 |
| <i>Olearia</i>       | <i>colensoi</i>      | EF635482 |                |                       |          |

**Table S21** Accession numbers for sequences included in the *Microsorium* phylogenetic tree

| Genus                    | Species                 | rps4     |
|--------------------------|-------------------------|----------|
| <i>Microsorium</i>       | <i>scolopendria</i>     | GQ256395 |
| <i>Microsorium</i>       | <i>punctatum</i>        | GQ256394 |
| <i>Microsorium</i>       | <i>fortunei</i>         | GQ256393 |
| <i>Lepidomicrosorium</i> | <i>buergerianum</i>     | EU363260 |
| <i>Microsorium</i>       | <i>zippeii</i>          | DQ642203 |
| <i>Microsorium</i>       | <i>membranifolium</i>   | DQ642200 |
| <i>Microsorium</i>       | <i>scandens</i>         | DQ401128 |
| <i>Microsorium</i>       | <i>pustulatum</i>       | DQ401127 |
| <i>Microsorium</i>       | <i>novae-zealandiae</i> | DQ401126 |
| <i>Goniophlebium</i>     | <i>subauriculatum</i>   | DQ168812 |
| <i>Microsorium</i>       | <i>vieillardii</i>      | DQ179637 |
| <i>Microsorium</i>       | <i>grossum</i>          | AY362695 |
| <i>Microsorium</i>       | <i>commutatum</i>       | AY362644 |
| <i>Microsorium</i>       | <i>varians</i>          | AY362638 |
| <i>Microsorium</i>       | <i>musifolium</i>       | AY362636 |
| <i>Microsorium</i>       | <i>linguiforme</i>      | AY362635 |
| <i>Neocheiropteris</i>   | <i>superficialis</i>    | AY725048 |
| <i>Microsorium</i>       | <i>membranaceum</i>     | AY725047 |

**Table S22** Accession numbers for sequences included in the *Myrsine* phylogenetic tree

| Genus            | Species              | clone  | ITS      |
|------------------|----------------------|--------|----------|
| <i>Anagallis</i> | <i>arvensis</i>      |        | EF436994 |
| <i>Anagallis</i> | <i>foemina</i>       |        | EF436999 |
| <i>Ardisia</i>   | <i>affinis</i>       |        | FJ482148 |
| <i>Ardisia</i>   | <i>villosa</i>       |        | FJ482150 |
| <i>Cyclamen</i>  | <i>parviflorum</i>   |        | AM990480 |
| <i>Cyclamen</i>  | <i>repandum</i>      |        | AM990481 |
| <i>Myrsine</i>   | <i>africana</i>      |        | EU886863 |
| <i>Myrsine</i>   | <i>aquilonia</i>     |        | EU886864 |
| <i>Myrsine</i>   | <i>argentea</i>      |        | EU886865 |
| <i>Myrsine</i>   | <i>australis</i>     |        | EU886866 |
| <i>Myrsine</i>   | <i>chathamica</i>    |        | EU886867 |
| <i>Myrsine</i>   | <i>coxii</i>         |        | EU886868 |
| <i>Myrsine</i>   | <i>divaricata</i>    |        | EU886870 |
| <i>Myrsine</i>   | <i>faberi</i>        |        | AF547731 |
| <i>Myrsine</i>   | <i>kermadecensis</i> |        | EU886874 |
| <i>Myrsine</i>   | <i>mccomishii</i>    |        | JF950790 |
| <i>Myrsine</i>   | <i>myrtillina</i>    | x19c17 | JF950791 |
| <i>Myrsine</i>   | <i>myrtillina</i>    | x19c18 | JF950792 |
| <i>Myrsine</i>   | <i>myrtillina</i>    | x19c22 | JF950793 |
| <i>Myrsine</i>   | <i>nummularia</i>    |        | EU886875 |
| <i>Myrsine</i>   | <i>oliveri</i>       |        | EU886876 |
| <i>Myrsine</i>   | <i>platystigma</i>   |        | JF950794 |
| <i>Myrsine</i>   | <i>salicina</i>      |        | EU886877 |
| <i>Myrsine</i>   | <i>umbricola</i>     |        | EU886878 |
| <i>Rapanea</i>   | <i>howittiana</i>    |        | DQ499108 |
| <i>Rapanea</i>   | <i>leucantha</i>     |        | DQ499107 |

**Table S23** Accession numbers for sequences included in the *Ophioglossum* phylogenetic tree

| Genus                   | Species                 | rbcl     | trnL-trnF |
|-------------------------|-------------------------|----------|-----------|
| <i>Angiopteris</i>      | <i>lygodiiifolia</i>    | AY138397 | -         |
| <i>Botrychium</i>       | <i>ascendens</i>        | L40982   | -         |
| <i>Botrychium</i>       | <i>atrovirens</i>       | AY138402 | -         |
| <i>Botrychium</i>       | <i>campestre</i>        | L40961   | -         |
| <i>Botrychium</i>       | <i>dissectum</i>        | AY138401 | -         |
| <i>Cheiroglossa</i>     | <i>palmata</i>          | AY138421 | -         |
| <i>Danaea</i>           | <i>elliptica</i>        | AY138398 | -         |
| <i>Helminthostachys</i> | <i>zeylanica</i>        | AY138409 | -         |
| <i>Marattia</i>         | <i>sp.</i>              | AY138399 | -         |
| <i>Ophioglossum</i>     | <i>coriaceum</i>        | JF950813 | JF950935  |
| <i>Ophioglossum</i>     | <i>costatum</i>         | AY138418 | AY138453  |
| <i>Ophioglossum</i>     | <i>crotalophoroides</i> | AY138417 | AY138452  |
| <i>Ophioglossum</i>     | <i>engelmannii</i>      | L11058   | -         |
| <i>Ophioglossum</i>     | <i>gomezianum</i>       | AY138419 | AY138454  |
| <i>Ophioglossum</i>     | <i>gramineum</i>        | AY138412 | AY138448  |
| <i>Ophioglossum</i>     | <i>lusitanicum</i>      | DQ646002 | -         |
| <i>Ophioglossum</i>     | <i>nudicaule</i>        | AY138416 | -         |
| <i>Ophioglossum</i>     | <i>pendulum</i>         | AY138420 | -         |
| <i>Ophioglossum</i>     | <i>petiolatum</i>       | AY138411 | AY138447  |
| <i>Ophioglossum</i>     | <i>pusillum</i>         | AY138413 | AY138449  |
| <i>Ophioglossum</i>     | <i>reticulatum</i>      | AY138410 | AY138446  |
| <i>Ophioglossum</i>     | <i>richardsiae</i>      | AY138415 | AY138451  |
| <i>Ophioglossum</i>     | <i>vulgatum</i>         | AY138414 | AY138450  |
| <i>Psilotum</i>         | <i>nudum</i>            | L11059   | -         |
| <i>Tmesipteris</i>      | <i>oblanceolata</i>     | U30836   | -         |



**Table S24** Accession numbers for sequences included in the *Paspalum* phylogenetic tree

| Genus                   | Species                | trnL     | atpB-rbcL | trnG     | trnL-trnF |
|-------------------------|------------------------|----------|-----------|----------|-----------|
| <i>Anthaenantiopsis</i> | <i>rojasiانا</i>       | EU627361 | EU627205  | EU627283 | EU627439  |
| <i>Axonopus</i>         | <i>anceps</i>          | EU871111 | -         | -        | -         |
| <i>Axonopus</i>         | <i>furcatus</i>        | EU627358 | EU627202  | EU627280 | EU627436  |
| <i>Axonopus</i>         | <i>rosengurttii</i>    | EU627362 | EU627206  | EU627284 | EU627440  |
| <i>Chasmanthium</i>     | <i>latifolium</i>      | EU871113 | -         | -        | -         |
| <i>Paspalum</i>         | <i>acuminatum</i>      | EU627356 | EU627200  | EU627278 | EU627434  |
| <i>Paspalum</i>         | <i>aff_jujuyense</i>   | EU627357 | EU627201  | EU627279 | EU627435  |
| <i>Paspalum</i>         | <i>alcalinum</i>       | EU627359 | EU627203  | EU627281 | EU627437  |
| <i>Paspalum</i>         | <i>almum</i>           | EU627360 | EU627204  | EU627282 | EU627438  |
| <i>Paspalum</i>         | <i>arundinaceum</i>    | EU871120 | EU627207  | EU627285 | EU627441  |
| <i>Paspalum</i>         | <i>arundinellum</i>    | EU871115 | -         | -        | -         |
| <i>Paspalum</i>         | <i>atratum</i>         | EU627364 | EU627208  | EU627286 | EU627442  |
| <i>Paspalum</i>         | <i>barretoi</i>        | DQ100083 | -         | -        | -         |
| <i>Paspalum</i>         | <i>bertonii</i>        | EU627365 | EU627209  | EU627287 | EU627443  |
| <i>Paspalum</i>         | <i>bicilium</i>        | EU627366 | EU627210  | EU627288 | EU627444  |
| <i>Paspalum</i>         | <i>ceresia</i>         | EU627367 | EU627211  | EU627289 | EU627445  |
| <i>Paspalum</i>         | <i>chacoense</i>       | EU627368 | EU627212  | EU627290 | EU627446  |
| <i>Paspalum</i>         | <i>chaseanum</i>       | EU871136 | EU627213  | EU627291 | EU627447  |
| <i>Paspalum</i>         | <i>commune</i>         | EU871144 | EU627214  | EU627292 | EU627448  |
| <i>Paspalum</i>         | <i>compressifolium</i> | EU627371 | EU627215  | EU627293 | EU627449  |
| <i>Paspalum</i>         | <i>conduplicatum</i>   | AY769158 | -         | -        | -         |
| <i>Paspalum</i>         | <i>conjugatum</i>      | EU627372 | EU627216  | EU627294 | EU627450  |
| <i>Paspalum</i>         | <i>conspersum</i>      | EU627374 | EU627218  | EU627296 | EU627452  |
| <i>Paspalum</i>         | <i>coryphaeum</i>      | EU871145 | -         | -        | -         |
| <i>Paspalum</i>         | <i>cromyorchizon</i>   | AY769159 | EU627219  | EU627297 | EU627453  |
| <i>Paspalum</i>         | <i>dasypleurum</i>     | DQ104311 | -         | DQ104291 | DQ104321  |
| <i>Paspalum</i>         | <i>dasytrichium</i>    | EU871117 | -         | -        | -         |
| <i>Paspalum</i>         | <i>dedeccae</i>        | AY769161 | -         | -        | -         |
| <i>Paspalum</i>         | <i>densum</i>          | EU871108 | -         | -        | -         |
| <i>Paspalum</i>         | <i>denticulatum</i>    | EU627376 | EU627220  | EU627298 | EU627454  |
| <i>Paspalum</i>         | <i>dilatatum</i>       | DQ104303 | EU627221  | EU627299 | EU627455  |
| <i>Paspalum</i>         | <i>distichum</i>       | EU871100 | EU627222  | EU627300 | EU627456  |
| <i>Paspalum</i>         | <i>durifolium</i>      | EU871140 | EU627223  | EU627301 | EU627457  |
| <i>Paspalum</i>         | <i>ellipticum</i>      | EU627380 | EU627224  | EU627302 | EU627458  |
| <i>Paspalum</i>         | <i>equitans</i>        | AY769164 | EU627225  | EU627303 | EU627459  |
| <i>Paspalum</i>         | <i>erianthum</i>       | EU871116 | EU627226  | EU627304 | EU627460  |
| <i>Paspalum</i>         | <i>exaltatum</i>       | EU871127 | EU627227  | EU627305 | EU627461  |
| <i>Paspalum</i>         | <i>falcatum</i>        | EU627384 | EU627228  | EU627306 | EU627462  |
| <i>Paspalum</i>         | <i>fasciculatum</i>    | EU627385 | EU627229  | EU627307 | EU627463  |
| <i>Paspalum</i>         | <i>filifolium</i>      | AY769165 | -         | -        | -         |
| <i>Paspalum</i>         | <i>fimbriatum</i>      | EU871114 | -         | -        | -         |
| <i>Paspalum</i>         | <i>flaccidum</i>       | AY769166 | -         | -        | -         |
| <i>Paspalum</i>         | <i>flavum</i>          | EU627386 | EU627230  | EU627308 | EU627464  |
| <i>Paspalum</i>         | <i>foliiforme</i>      | EU627387 | EU627231  | EU627309 | EU627465  |
| <i>Paspalum</i>         | <i>glabrinode</i>      | EU871106 | EU627232  | EU627310 | EU627466  |
| <i>Paspalum</i>         | <i>guenoarum</i>       | EU627389 | EU627233  | EU627311 | EU627467  |
| <i>Paspalum</i>         | <i>haumanii</i>        | EU871129 | EU627234  | EU627312 | EU627468  |
| <i>Paspalum</i>         | <i>humboldtianum</i>   | EU627391 | EU627235  | EU627313 | EU627469  |
| <i>Paspalum</i>         | <i>inaequivalve</i>    | EU627392 | EU627236  | EU627314 | EU627470  |
| <i>Paspalum</i>         | <i>inconstans</i>      | EU871123 | EU627237  | EU627315 | EU627471  |
| <i>Paspalum</i>         | <i>indecorum</i>       | EU627394 | EU627238  | EU627316 | EU627472  |
| <i>Paspalum</i>         | <i>intermedium</i>     | EU871103 | EU627239  | EU627317 | EU627473  |
| <i>Paspalum</i>         | <i>ionanthum</i>       | EU627396 | EU627240  | EU627318 | EU627474  |
| <i>Paspalum</i>         | <i>juergensii</i>      | AY769169 | EU627241  | EU627319 | EU627475  |
| <i>Paspalum</i>         | <i>lepton</i>          | EU627398 | EU627242  | EU627320 | EU627476  |
| <i>Paspalum</i>         | <i>lilloi</i>          | EU627399 | EU627243  | EU627321 | EU627477  |
| <i>Paspalum</i>         | <i>limbatum</i>        | EU627400 | EU627244  | EU627322 | EU627478  |
| <i>Paspalum</i>         | <i>lineare</i>         | EU627401 | EU627245  | EU627323 | EU627479  |
| <i>Paspalum</i>         | <i>macrophyllum</i>    | EU871122 | -         | -        | -         |
| <i>Paspalum</i>         | <i>maculosum</i>       | AY769172 | EU627246  | EU627324 | EU627480  |
| <i>Paspalum</i>         | <i>malacophyllum</i>   | EU871099 | EU627247  | EU627325 | EU627481  |
| <i>Paspalum</i>         | <i>mandiocanum</i>     | EU627404 | EU627248  | EU627326 | EU627482  |
| <i>Paspalum</i>         | <i>millegrana</i>      | EU871109 | -         | -        | -         |
| <i>Paspalum</i>         | <i>minus</i>           | AY769173 | -         | -        | -         |
| <i>Paspalum</i>         | <i>modestum</i>        | EU627405 | EU627249  | EU627327 | EU627483  |
| <i>Paspalum</i>         | <i>notatum</i>         | AY769174 | EU627250  | EU627328 | EU627484  |
| <i>Paspalum</i>         | <i>nummularium</i>     | DQ100082 | -         | -        | -         |

**Table S24 cont.** Accession numbers for sequences included in the *Paspalum* phylogenetic tree

| Genus               | Species              | trnL     | atpB-rbcL | trnG     | trnL-trnF |
|---------------------|----------------------|----------|-----------|----------|-----------|
| <i>Paspalum</i>     | <i>orbiculatum</i>   | EU627407 | EU627251  | EU627329 | EU627485  |
| <i>Paspalum</i>     | <i>ovale</i>         | EU627408 | EU627252  | EU627330 | EU627486  |
| <i>Paspalum</i>     | <i>pallens</i>       | AY769176 | -         | -        | -         |
| <i>Paspalum</i>     | <i>palustre</i>      | EU871119 | EU627253  | EU627331 | EU627487  |
| <i>Paspalum</i>     | <i>paniculatum</i>   | EU627410 | EU627254  | EU627332 | -         |
| <i>Paspalum</i>     | <i>paucifolium</i>   | AY769177 | -         | DQ104292 | DQ104322  |
| <i>Paspalum</i>     | <i>paucifolium</i>   | EU627411 | EU627255  | EU627333 | EU627489  |
| <i>Paspalum</i>     | <i>pilosum</i>       | EU627412 | EU627256  | EU627334 | EU627490  |
| <i>Paspalum</i>     | <i>plenum</i>        | EU871133 | -         | -        | -         |
| <i>Paspalum</i>     | <i>plicatulum</i>    | EU871125 | EU627257  | EU627335 | EU627491  |
| <i>Paspalum</i>     | <i>polyphyllum</i>   | EU627414 | EU627258  | EU627336 | EU627492  |
| <i>Paspalum</i>     | <i>pumilum</i>       | AY769178 | EU627259  | EU627337 | EU627493  |
| <i>Paspalum</i>     | <i>quadrifarium</i>  | AY941151 | AY941143  | AY941131 | AY941159  |
| <i>Paspalum</i>     | <i>quarinii</i>      | EU871132 | EU627261  | EU627339 | EU627495  |
| <i>Paspalum</i>     | <i>ramboi</i>        | AY769179 | -         | -        | -         |
| <i>Paspalum</i>     | <i>regnellii</i>     | EU871139 | -         | -        | -         |
| <i>Paspalum</i>     | <i>remotum</i>       | EU627418 | EU627262  | EU627340 | EU627496  |
| <i>Paspalum</i>     | <i>repens</i>        | EU627419 | EU627263  | EU627341 | EU627497  |
| <i>Paspalum</i>     | <i>rufum</i>         | EU871126 | EU627264  | EU627342 | EU627498  |
| <i>Paspalum</i>     | <i>scrobiculatum</i> | EU627421 | EU627266  | EU627344 | EU627500  |
| <i>Paspalum</i>     | <i>setaceum</i>      | EU627423 | EU627267  | EU627345 | EU627501  |
| <i>Paspalum</i>     | <i>simplex</i>       | EU627424 | EU627268  | EU627346 | EU627502  |
| <i>Paspalum</i>     | <i>stellatum</i>     | EU627425 | EU627269  | EU627347 | EU627503  |
| <i>Paspalum</i>     | <i>subciliatum</i>   | AY769180 | -         | -        | -         |
| <i>Paspalum</i>     | <i>trichostomum</i>  | EU627428 | EU627272  | EU627350 | EU627506  |
| <i>Paspalum</i>     | <i>unispicatum</i>   | EU627429 | EU627273  | EU627351 | EU627507  |
| <i>Paspalum</i>     | <i>urvillei</i>      | AY769181 | -         | DQ104290 | DQ104320  |
| <i>Paspalum</i>     | <i>usteri</i>        | EU627430 | EU627274  | EU627352 | EU627508  |
| <i>Paspalum</i>     | <i>vaginatum</i>     | EU627431 | EU627275  | EU627353 | EU627509  |
| <i>Paspalum</i>     | <i>virgatum</i>      | EU871137 | EU627276  | EU627354 | EU627510  |
| <i>Paspalum</i>     | <i>wrightii</i>      | EU627433 | EU627277  | EU627355 | EU627511  |
| <i>Sacciolepis</i>  | <i>vilvoides</i>     | EU871142 | -         | -        | -         |
| <i>Thrasypopsis</i> | <i>juergensii</i>    | EU627426 | EU627270  | EU627348 | EU627504  |
| <i>Thrasypopsis</i> | <i>repanda</i>       | EU627427 | EU627271  | EU627349 | EU627505  |

**Table S25** Accession numbers for sequences included in the *Cheilanthes* and *Pellaea* phylogenetic tree

| Genus                 | Species                 | rps4     | trnL-trnF | Genus                  | Species                 | rps4     | trnL-trnF |
|-----------------------|-------------------------|----------|-----------|------------------------|-------------------------|----------|-----------|
| <i>Adiantum</i>       | <i>aleuticum</i>        | DQ915577 | -         | <i>Doryopteris</i>     | <i>rediviva</i>         | DQ914141 | -         |
| <i>Adiantum</i>       | <i>pedatum</i>          | DQ915578 | -         | <i>Doryopteris</i>     | <i>triphylla</i>        | DQ914139 | -         |
| <i>Aleuritopteris</i> | <i>farinosa</i>         | DQ914165 | -         | <i>Mildella</i>        | <i>intramarginalis</i>  | DQ914164 | -         |
| <i>Argyrochosma</i>   | <i>fendleri</i>         | DQ914125 | DQ914209  | <i>Notholaena</i>      | <i>affinis</i>          | DQ914166 | -         |
| <i>Argyrochosma</i>   | <i>incana</i>           | EU831145 | EU831181  | <i>Notholaena</i>      | <i>californica</i>      | DQ914167 | -         |
| <i>Argyrochosma</i>   | <i>jonesii</i>          | DQ914126 | DQ914210  | <i>Notholaena</i>      | <i>candida</i>          | DQ914168 | -         |
| <i>Argyrochosma</i>   | <i>limitanea</i>        | DQ914127 | DQ914211  | <i>Notholaena</i>      | <i>standleyi</i>        | DQ914169 | -         |
| <i>Argyrochosma</i>   | <i>nivea</i>            | DQ914128 | DQ914212  | <i>Paraceterach</i>    | <i>muelleri</i>         | DQ914112 | DQ914203  |
| <i>Aspidotis</i>      | <i>californica</i>      | DQ914129 | DQ914213  | <i>Paragymnopteris</i> | <i>bipinnata</i>        | DQ914113 | DQ914204  |
| <i>Aspidotis</i>      | <i>carlotta-halliae</i> | DQ914130 | DQ914214  | <i>Paragymnopteris</i> | <i>marantae</i>         | EU831143 | EU831179  |
| <i>Aspidotis</i>      | <i>densa</i>            | DQ914131 | DQ914215  | <i>Paragymnopteris</i> | <i>sargentii</i>        | DQ914117 | DQ914207  |
| <i>Astrolepis</i>     | <i>cochisensis</i>      | DQ914132 | EU831184  | <i>Paragymnopteris</i> | <i>vestita</i>          | EU831144 | EU831180  |
| <i>Astrolepis</i>     | <i>integerrima</i>      | EU831148 | -         | <i>Pellaea</i>         | <i>andromedifolia</i>   | DQ914073 | DQ914174  |
| <i>Astrolepis</i>     | <i>sinuata</i>          | DQ914137 | DQ914218  | <i>Pellaea</i>         | <i>atropurpurea</i>     | DQ914074 | DQ914176  |
| <i>Astrolepis</i>     | <i>windhamii</i>        | DQ914134 | EU831185  | <i>Pellaea</i>         | <i>brachyptera</i>      | DQ914076 | DQ914177  |
| <i>Cheilanthes</i>    | <i>acrostica</i>        | DQ914142 | -         | <i>Pellaea</i>         | <i>breweri</i>          | DQ914077 | DQ914179  |
| <i>Cheilanthes</i>    | <i>alabamensis</i>      | DQ914144 | DQ914220  | <i>Pellaea</i>         | <i>bridgesii</i>        | EU831118 | EU831163  |
| <i>Cheilanthes</i>    | <i>arizonica</i>        | DQ914143 | DQ914219  | <i>Pellaea</i>         | <i>calomelanos</i>      | DQ914119 | -         |
| <i>Cheilanthes</i>    | <i>bonariensis</i>      | EU831150 | EU831186  | <i>Pellaea</i>         | <i>doniana</i>          | DQ914120 | -         |
| <i>Cheilanthes</i>    | <i>buchtienii</i>       | DQ914145 | -         | <i>Pellaea</i>         | <i>dura</i>             | DQ914121 | -         |
| <i>Cheilanthes</i>    | <i>covillei</i>         | DQ914146 | DQ914221  | <i>Pellaea</i>         | <i>falcata</i>          | DQ914085 | DQ914182  |
| <i>Cheilanthes</i>    | <i>distans</i>          | DQ914147 | -         | <i>Pellaea</i>         | <i>glabella</i>         | DQ914087 | DQ914184  |
| <i>Cheilanthes</i>    | <i>eatonii</i>          | DQ914148 | DQ914222  | <i>Pellaea</i>         | <i>gleichenioides</i>   | DQ914138 | -         |
| <i>Cheilanthes</i>    | <i>feeii</i>            | EU831151 | EU831187  | <i>Pellaea</i>         | <i>intermedia</i>       | DQ914089 | DQ914186  |
| <i>Cheilanthes</i>    | <i>fendleri</i>         | DQ914151 | DQ914225  | <i>Pellaea</i>         | <i>longipilosa</i>      | DQ914122 | -         |
| <i>Cheilanthes</i>    | <i>gracillima</i>       | DQ914152 | DQ914226  | <i>Pellaea</i>         | <i>lyngholmii</i>       | EU831121 | EU831166  |
| <i>Cheilanthes</i>    | <i>lanosa</i>           | DQ914153 | DQ914227  | <i>Pellaea</i>         | <i>maxima</i>           | DQ914123 | -         |
| <i>Cheilanthes</i>    | <i>lendigera</i>        | DQ914154 | DQ914228  | <i>Pellaea</i>         | <i>mucronata</i>        | DQ914094 | DQ914191  |
| <i>Cheilanthes</i>    | <i>multifida</i>        | DQ914155 | -         | <i>Pellaea</i>         | <i>notabilis</i>        | DQ914099 | DQ914194  |
| <i>Cheilanthes</i>    | <i>newberryi</i>        | EU831152 | EU831188  | <i>Pellaea</i>         | <i>ovata</i>            | EU831125 | EU831170  |
| <i>Pellaea</i>        | <i>nitidula</i>         | -        | DQ432662  | <i>Pellaea</i>         | <i>paradoxa</i>         | JF950817 | JF950936  |
| <i>Cheilanthes</i>    | <i>notholaenoides</i>   | DQ914156 | DQ914229  | <i>Pellaea</i>         | <i>patula</i>           | -        | DQ432663  |
| <i>Cheilanthes</i>    | <i>parryi</i>           | DQ914157 | DQ914230  | <i>Pellaea</i>         | <i>paupercula</i>       | -        | DQ432664  |
| <i>Cheilanthes</i>    | <i>parviloba</i>        | DQ914158 | -         | <i>Pellaea</i>         | <i>pectiniformis</i>    | DQ914124 | -         |
| <i>Cheilanthes</i>    | <i>pringlei</i>         | EU831153 | EU831189  | <i>Pellaea</i>         | <i>rotundifolia</i>     | DQ914084 | DQ914181  |
| <i>Cheilanthes</i>    | <i>sieberi</i>          | EU831154 | EU831190  | <i>Pellaea</i>         | <i>sagittata</i>        | EU831126 | EU831171  |
| <i>Cheilanthes</i>    | <i>skinneri</i>         | DQ914159 | DQ914231  | <i>Pellaea</i>         | <i>sp UC1788706</i>     | DQ914098 | DQ914192  |
| <i>Cheilanthes</i>    | <i>tomentosa</i>        | DQ914160 | DQ914232  | <i>Pellaea</i>         | <i>ternifolia</i>       | EU831130 | EU831174  |
| <i>Cheilanthes</i>    | <i>viridis</i>          | DQ914162 | -         | <i>Pellaea</i>         | <i>trichophylla</i>     | -        | DQ432661  |
| <i>Cheilanthes</i>    | <i>wrightii</i>         | DQ914163 | DQ914233  | <i>Pellaea</i>         | <i>truncata</i>         | DQ914107 | DQ914199  |
| <i>Cheilanthes</i>    | <i>yavapensis</i>       | EU831155 | EU831191  | <i>Pellaea</i>         | <i>wrightiana</i>       | EU831136 | EU831178  |
| <i>Doryopteris</i>    | <i>nobilis</i>          | DQ914140 | -         | <i>Adiantum</i>        | <i>capillus-veneris</i> | AY178864 | DQ432689  |

**Table S26** Accession numbers for sequences included in the *Peperomia* phylogenetic tree

| Genus             | Species                  | ITS      | trnL-trnF | Genus            | Species                 | ITS      | trnL-trnF |
|-------------------|--------------------------|----------|-----------|------------------|-------------------------|----------|-----------|
| <i>Macropiper</i> | <i>excelsum</i>          | JF950773 | -         | <i>Peperomia</i> | <i>maypurensis</i>      | FJ424436 | -         |
| <i>Peperomia</i>  | <i>andina</i>            | FJ424416 | -         | <i>Peperomia</i> | <i>metallica</i>        | FJ424438 | -         |
| <i>Peperomia</i>  | <i>argyreia</i>          | FJ424434 | -         | <i>Peperomia</i> | <i>microphyllophora</i> | DQ868696 | -         |
| <i>Peperomia</i>  | <i>bicolor</i>           | FJ424465 | -         | <i>Peperomia</i> | <i>nivalis</i>          | FJ424422 | -         |
| <i>Peperomia</i>  | <i>blanda</i>            | FJ424455 | EU519561  | <i>Peperomia</i> | <i>obtusifolia</i>      | DQ868697 | -         |
| <i>Peperomia</i>  | <i>caperata</i>          | -        | EU519556  | <i>Peperomia</i> | <i>pellucida</i>        | FJ424437 | EU519566  |
| <i>Peperomia</i>  | <i>cavaleriei</i>        | -        | EU519562  | <i>Peperomia</i> | <i>pereskiiifolia</i>   | FJ424427 | -         |
| <i>Peperomia</i>  | <i>clusiifolia</i>       | FJ424450 | -         | <i>Peperomia</i> | <i>pernambucensis</i>   | FJ424451 | -         |
| <i>Peperomia</i>  | <i>congesta</i>          | DQ868692 | -         | <i>Peperomia</i> | <i>pinoi</i>            | FJ424417 | -         |
| <i>Peperomia</i>  | <i>cotyledon</i>         | FJ424418 | -         | <i>Peperomia</i> | <i>pitcairnensis</i>    | FJ424459 | -         |
| <i>Peperomia</i>  | <i>cuspidilimba</i>      | FJ424430 | -         | <i>Peperomia</i> | <i>polystachya</i>      | FJ424458 | -         |
| <i>Peperomia</i>  | <i>dahlstedtii</i>       | FJ424432 | -         | <i>Peperomia</i> | <i>ppucu-ppucu</i>      | FJ424435 | -         |
| <i>Peperomia</i>  | <i>dolabella</i>         | FJ424415 | -         | <i>Peperomia</i> | <i>prostrata</i>        | FJ424462 | -         |
| <i>Peperomia</i>  | <i>dolabriformis</i>     | FJ424421 | -         | <i>Peperomia</i> | <i>puteolata</i>        | DQ868698 | -         |
| <i>Peperomia</i>  | <i>elongata</i>          | AF275213 | -         | <i>Peperomia</i> | <i>quadrifolia</i>      | DQ868699 | -         |
| <i>Peperomia</i>  | <i>emarginella</i>       | FJ424426 | EU519576  | <i>Peperomia</i> | <i>reptilis</i>         | FJ424439 | -         |
| <i>Peperomia</i>  | <i>fagerlindii</i>       | FJ424442 | -         | <i>Peperomia</i> | <i>resediflora</i>      | FJ424419 | -         |
| <i>Peperomia</i>  | <i>fernandopoiana</i>    | -        | EU519565  | <i>Peperomia</i> | <i>retusa</i>           | -        | EU519564  |
| <i>Peperomia</i>  | <i>galioides</i>         | FJ424452 | -         | <i>Peperomia</i> | <i>rhombea</i>          | FJ424429 | -         |
| <i>Peperomia</i>  | <i>glabella</i>          | FJ424454 | EU519574  | <i>Peperomia</i> | <i>rhomboidea</i>       | DQ868700 | -         |
| <i>Peperomia</i>  | <i>gracillima</i>        | FJ424414 | -         | <i>Peperomia</i> | <i>rotundifolia</i>     | FJ424460 | -         |
| <i>Peperomia</i>  | <i>graveolens</i>        | FJ424420 | -         | <i>Peperomia</i> | <i>sandwicensis</i>     | -        | EU519572  |
| <i>Peperomia</i>  | <i>hernandiifolia</i>    | -        | EU519569  | <i>Peperomia</i> | <i>serpens</i>          | FJ424446 | EU519577  |
| <i>Peperomia</i>  | <i>hesperomannii</i>     | -        | EU519571  | <i>Peperomia</i> | <i>sodiroi</i>          | FJ424441 | -         |
| <i>Peperomia</i>  | <i>hoffmannii</i>        | FJ424431 | -         | <i>Peperomia</i> | <i>sp.</i>              | FJ424463 | -         |
| <i>Peperomia</i>  | <i>hylophila</i>         | FJ424456 | -         | <i>Peperomia</i> | <i>tetraphylla</i>      | FJ424428 | EU519557  |
| <i>Peperomia</i>  | <i>inaequalifolia</i>    | FJ424453 | -         | <i>Peperomia</i> | <i>trifolia</i>         | FJ424433 | -         |
| <i>Peperomia</i>  | <i>incana</i>            | FJ424443 | -         | <i>Peperomia</i> | <i>tristachya</i>       | FJ424440 | -         |
| <i>Peperomia</i>  | <i>kamerunana</i>        | -        | EU519570  | <i>Peperomia</i> | <i>tuisana</i>          | FJ424464 | -         |
| <i>Peperomia</i>  | <i>lanceolatopeltata</i> | FJ424448 | -         | <i>Peperomia</i> | <i>urocarpa</i>         | -        | EU519575  |
| <i>Peperomia</i>  | <i>lancifolia</i>        | FJ424457 | -         | <i>Peperomia</i> | <i>urveillana</i>       | JF950798 | JF950937  |
| <i>Peperomia</i>  | <i>lehmannii</i>         | FJ424423 | -         | <i>Peperomia</i> | <i>verschaffeltii</i>   | FJ424425 | -         |
| <i>Peperomia</i>  | <i>leptostachya</i>      | -        | EU519573  | <i>Peperomia</i> | <i>vestita</i>          | FJ424461 | -         |
| <i>Peperomia</i>  | <i>longispicata</i>      | FJ424444 | -         | <i>Peperomia</i> | <i>vinasiana</i>        | FJ424445 | -         |
| <i>Peperomia</i>  | <i>macrostachya</i>      | FJ424447 | -         | <i>Piper</i>     | <i>stipulare</i>        | DQ868746 | -         |
| <i>Peperomia</i>  | <i>magnoliifolia</i>     | FJ424449 | -         | <i>Piper</i>     | <i>vitiense</i>         | DQ868752 | -         |
| <i>Peperomia</i>  | <i>marmorata</i>         | FJ424424 | -         |                  |                         |          |           |

**Table S27** Accession numbers for sequences included in the *Polystichum* phylogenetic tree

| Genus              | Species                  | rps4     | Genus              | Species                 | rps4     |
|--------------------|--------------------------|----------|--------------------|-------------------------|----------|
| <i>Dryopteris</i>  | <i>subpycnopteroides</i> | DQ191880 | <i>Polystichum</i> | <i>makinoi</i>          | DQ202462 |
| <i>Dryopteris</i>  | <i>subtriangularis</i>   | DQ191881 | <i>Polystichum</i> | <i>mayebarae</i>        | DQ153079 |
| <i>Dryopteris</i>  | <i>tsongii</i>           | DQ191882 | <i>Polystichum</i> | <i>moorei</i>           | AY164628 |
| <i>Dryopteris</i>  | <i>uniformis</i>         | DQ191883 | <i>Polystichum</i> | <i>moupinense</i>       | DQ151871 |
| <i>Dryopteris</i>  | <i>wallichiana</i>       | DQ191884 | <i>Polystichum</i> | <i>neolobatum</i>       | DQ202463 |
| <i>Polystichum</i> | <i>acutidens</i>         | DQ202451 | <i>Polystichum</i> | <i>neozelandicum</i>    | AY164631 |
| <i>Polystichum</i> | <i>altum</i>             | DQ151858 | <i>Polystichum</i> | <i>nepalense</i>        | DQ202465 |
| <i>Polystichum</i> | <i>attenuatum</i>        | DQ151859 | <i>Polystichum</i> | <i>nudisorum</i>        | DQ151872 |
| <i>Polystichum</i> | <i>auriculatum</i>       | DQ151860 | <i>Polystichum</i> | <i>oculatum</i>         | AY164633 |
| <i>Polystichum</i> | <i>australiense</i>      | AY164624 | <i>Polystichum</i> | <i>omeiense</i>         | DQ202466 |
| <i>Polystichum</i> | <i>brachypterum</i>      | DQ202452 | <i>Polystichum</i> | <i>oreodoxa</i>         | DQ202467 |
| <i>Polystichum</i> | <i>chingae</i>           | DQ151861 | <i>Polystichum</i> | <i>parvifoliolatum</i>  | DQ151873 |
| <i>Polystichum</i> | <i>christii</i>          | DQ151862 | <i>Polystichum</i> | <i>piceopaleaceum</i>   | DQ151874 |
| <i>Polystichum</i> | <i>chunii</i>            | DQ202453 | <i>Polystichum</i> | <i>polyblepharum</i>    | DQ202468 |
| <i>Polystichum</i> | <i>craspedosorum</i>     | DQ202454 | <i>Polystichum</i> | <i>proliferum</i>       | AY164627 |
| <i>Polystichum</i> | <i>crinigerum</i>        | DQ202455 | <i>Polystichum</i> | <i>pseudomakinoi</i>    | DQ202469 |
| <i>Polystichum</i> | <i>cystostegia</i>       | AY164630 | <i>Polystichum</i> | <i>punctiferum</i>      | DQ151875 |
| <i>Polystichum</i> | <i>deltodon</i>          | DQ202456 | <i>Polystichum</i> | <i>pycnopterum</i>      | DQ151876 |
| <i>Polystichum</i> | <i>dielsii</i>           | DQ151863 | <i>Polystichum</i> | <i>retrosopaleaceum</i> | DQ202470 |
| <i>Polystichum</i> | <i>discretum</i>         | DQ151864 | <i>Polystichum</i> | <i>semifertile</i>      | DQ151877 |
| <i>Polystichum</i> | <i>disjunctum</i>        | DQ151865 | <i>Polystichum</i> | <i>setiferum</i>        | AY164638 |
| <i>Polystichum</i> | <i>erosum</i>            | DQ151866 | <i>Polystichum</i> | <i>silvaticum</i>       | AY164634 |
| <i>Polystichum</i> | <i>fallax</i>            | AY164625 | <i>Polystichum</i> | <i>sinotsussimense</i>  | DQ151878 |
| <i>Polystichum</i> | <i>formosum</i>          | AY164626 | <i>Polystichum</i> | <i>stenophyllum</i>     | DQ202471 |
| <i>Polystichum</i> | <i>fugongense</i>        | DQ202458 | <i>Polystichum</i> | <i>stimulans</i>        | DQ151879 |
| <i>Polystichum</i> | <i>gongboense</i>        | DQ151867 | <i>Polystichum</i> | <i>subacutidens</i>     | DQ151880 |
| <i>Polystichum</i> | <i>grandifrons</i>       | DQ202459 | <i>Polystichum</i> | <i>thomsonii</i>        | EU106598 |
| <i>Polystichum</i> | <i>herbaceum</i>         | DQ151868 | <i>Polystichum</i> | <i>tripteron</i>        | EU109280 |
| <i>Polystichum</i> | <i>jizhushanense</i>     | DQ151869 | <i>Polystichum</i> | <i>tsus-simense</i>     | DQ151881 |
| <i>Polystichum</i> | <i>latilepis</i>         | DQ202460 | <i>Polystichum</i> | <i>vestitum</i>         | AY164635 |
| <i>Polystichum</i> | <i>lentum</i>            | AY164637 | <i>Polystichum</i> | <i>wawranum</i>         | AY164636 |
| <i>Polystichum</i> | <i>lichiangense</i>      | EU106599 | <i>Polystichum</i> | <i>whiteleggei</i>      | AY164629 |
| <i>Polystichum</i> | <i>lonchitis</i>         | EU031781 | <i>Polystichum</i> | <i>xiphophyllum</i>     | DQ151882 |
| <i>Polystichum</i> | <i>longipaleatum</i>     | DQ202461 | <i>Polystichum</i> | <i>yuanum</i>           | DQ151883 |
| <i>Polystichum</i> | <i>longipinnulum</i>     | DQ151870 |                    |                         |          |

**Table S28** Accession numbers for sequences included in the *Pteris* phylogenetic tree

| Genus                | Species                | rbcl     | Genus         | Species             | rbcl     |
|----------------------|------------------------|----------|---------------|---------------------|----------|
| <i>Acrostichum</i>   | <i>aureum</i>          | AB059586 | <i>Pteris</i> | <i>arborea</i>      | EF452168 |
| <i>Acrostichum</i>   | <i>danaeifolium</i>    | EF452129 | <i>Pteris</i> | <i>argyraea</i>     | EF452169 |
| <i>Actiniopteris</i> | <i>dimorpha</i>        | EF452130 | <i>Pteris</i> | <i>brasilensis</i>  | EF473702 |
| <i>Actiniopteris</i> | <i>radiata</i>         | AF336100 | <i>Pteris</i> | <i>comans</i>       | EF469954 |
| <i>Adiantum</i>      | <i>raddianum</i>       | U05906   | <i>Pteris</i> | <i>cretica</i>      | EF452170 |
| <i>Adiantum</i>      | <i>tenerum</i>         | EF452134 | <i>Pteris</i> | <i>decurrens</i>    | EF473703 |
| <i>Anogramma</i>     | <i>leptophylla</i>     | AY168715 | <i>Pteris</i> | <i>deflexa</i>      | EF473704 |
| <i>Blechnum</i>      | <i>occidentale</i>     | U05910   | <i>Pteris</i> | <i>denticulata</i>  | EF473705 |
| <i>Ceratopteris</i>  | <i>pteridoides</i>     | AB059584 | <i>Pteris</i> | <i>fauriei</i>      | U05647   |
| <i>Ceratopteris</i>  | <i>richardii</i>       | AB059585 | <i>Pteris</i> | <i>lechleri</i>     | EF473706 |
| <i>Coniogramme</i>   | <i>fraxinea</i>        | AM177359 | <i>Pteris</i> | <i>leptophylla</i>  | EF473707 |
| <i>Cryptogramma</i>  | <i>crispa</i>          | EF452148 | <i>Pteris</i> | <i>microptera</i>   | JF950814 |
| <i>Jamesonia</i>     | <i>verticalis</i>      | EF452155 | <i>Pteris</i> | <i>multifida</i>    | EF452171 |
| <i>Neurocallis</i>   | <i>praestantissima</i> | EF452158 | <i>Pteris</i> | <i>propinqua</i>    | EF452172 |
| <i>Ochropteris</i>   | <i>pallens</i>         | EF452160 | <i>Pteris</i> | <i>quadriaurita</i> | EF452173 |
| <i>Onychium</i>      | <i>japonicum</i>       | U05641   | <i>Pteris</i> | <i>splendens</i>    | EF473708 |
| <i>Onychium</i>      | <i>plumosum</i>        | AY266408 | <i>Pteris</i> | <i>tremula</i>      | EF452174 |
| <i>Platzoma</i>      | <i>microphyllum</i>    | AY168721 | <i>Pteris</i> | <i>vittata</i>      | U05941   |

**Table S29** Accession numbers for sequences included in the *Pterostylis* phylogenetic tree

| Genus              | Species             | ITS      | Genus              | Species             | ITS      |
|--------------------|---------------------|----------|--------------------|---------------------|----------|
| <i>Megastylis</i>  | <i>glandulosus</i>  | AF348042 | <i>Pterostylis</i> | <i>mutica</i>       | AY134640 |
| <i>Pterostylis</i> | <i>aff_barbata</i>  | AY134625 | <i>Pterostylis</i> | <i>nigricans</i>    | AY134641 |
| <i>Pterostylis</i> | <i>alata</i>        | AY134620 | <i>Pterostylis</i> | <i>nutans</i>       | EU681223 |
| <i>Pterostylis</i> | <i>allantoidea</i>  | AY134621 | <i>Pterostylis</i> | <i>obtusa</i>       | JF950799 |
| <i>Pterostylis</i> | <i>aphylla</i>      | EU681195 | <i>Pterostylis</i> | <i>oliveri</i>      | FJ473348 |
| <i>Pterostylis</i> | <i>atriola</i>      | EU681197 | <i>Pterostylis</i> | <i>ophioglossa</i>  | AY134642 |
| <i>Pterostylis</i> | <i>australis</i>    | AY134622 | <i>Pterostylis</i> | <i>parviflora</i>   | AY134643 |
| <i>Pterostylis</i> | <i>banksii</i>      | AY134623 | <i>Pterostylis</i> | <i>pedoglossa</i>   | AY134644 |
| <i>Pterostylis</i> | <i>baptistii</i>    | AY134624 | <i>Pterostylis</i> | <i>pedunculata</i>  | AY134645 |
| <i>Pterostylis</i> | <i>bicolor</i>      | AY134626 | <i>Pterostylis</i> | <i>plumosa</i>      | AY134646 |
| <i>Pterostylis</i> | <i>bicornis</i>     | AY134627 | <i>Pterostylis</i> | <i>pratensis</i>    | EU681239 |
| <i>Pterostylis</i> | <i>biseta</i>       | AY134628 | <i>Pterostylis</i> | <i>pyramidalis</i>  | AY134647 |
| <i>Pterostylis</i> | <i>clavigera</i>    | AY134629 | <i>Pterostylis</i> | <i>recurva</i>      | AY134648 |
| <i>Pterostylis</i> | <i>collina</i>      | AY134630 | <i>Pterostylis</i> | <i>rufa</i>         | AF348056 |
| <i>Pterostylis</i> | <i>commutata</i>    | EU681199 | <i>Pterostylis</i> | <i>sanguinea</i>    | AY134649 |
| <i>Pterostylis</i> | <i>concinna</i>     | AY134631 | <i>Pterostylis</i> | <i>sargentii</i>    | AY134651 |
| <i>Pterostylis</i> | <i>cucullata</i>    | AY134632 | <i>Pterostylis</i> | <i>scabrida</i>     | EU681240 |
| <i>Pterostylis</i> | <i>curta</i>        | AF348054 | <i>Pterostylis</i> | <i>smaragdina</i>   | AY134652 |
| <i>Pterostylis</i> | <i>cycnocephala</i> | AY134633 | <i>Pterostylis</i> | <i>spathulata</i>   | AY134653 |
| <i>Pterostylis</i> | <i>daintreana</i>   | AF348055 | <i>Pterostylis</i> | <i>stenochila</i>   | EU681242 |
| <i>Pterostylis</i> | <i>decurva</i>      | AY134634 | <i>Pterostylis</i> | <i>tasmanica</i>    | EU681245 |
| <i>Pterostylis</i> | <i>dilatata</i>     | AY134635 | <i>Pterostylis</i> | <i>taurus</i>       | AY134654 |
| <i>Pterostylis</i> | <i>foliata</i>      | AY134636 | <i>Pterostylis</i> | <i>tunstallii</i>   | EU681248 |
| <i>Pterostylis</i> | <i>graminea</i>     | AY134637 | <i>Pterostylis</i> | <i>turfosa</i>      | AY134655 |
| <i>Pterostylis</i> | <i>grandiflora</i>  | EU681211 | <i>Pterostylis</i> | <i>vernalis</i>     | AY134656 |
| <i>Pterostylis</i> | <i>laxa</i>         | AY134638 | <i>Pterostylis</i> | <i>vittata</i>      | AY134657 |
| <i>Pterostylis</i> | <i>longifolia</i>   | AY134639 | <i>Pterostylis</i> | <i>williamsonii</i> | EU681252 |
| <i>Pterostylis</i> | <i>melagramma</i>   | EU681220 | <i>Spiranthes</i>  | <i>vernalis</i>     | EU384876 |

**Table S30** Accession numbers for sequences included in the *Xylosma* phylogenetic tree

| Genus             | Species            | trnL Acc. | trnL-trnF Acc. |
|-------------------|--------------------|-----------|----------------|
| <i>Flacourtia</i> | <i>jangomas</i>    | AY756946  | AY757021       |
| <i>Abatia</i>     | <i>spicata</i>     | AY756977  | AY756983       |
| <i>Idesia</i>     | <i>polycarpa</i>   | AY756922  | AY757030       |
| <i>Populus</i>    | <i>tremuloides</i> | AY756927  | AY757054       |
| <i>Banara</i>     | <i>domingensis</i> | AY756936  | AY756990       |
| <i>Casearia</i>   | <i>javitensis</i>  | AY756899  | AY757015       |
| <i>Xylosma</i>    | <i>maidenii</i>    | JF950894  | JF950894       |
| <i>Xylosma</i>    | <i>parviflorum</i> | JF950895  | JF950895       |
| <i>Xylosma</i>    | <i>cordata</i>     | AY756969  | AY757079       |
| <i>Xylosma</i>    | <i>hispidula</i>   | AY756970  | AY757080       |
| <i>Xylosma</i>    | <i>bahamensis</i>  | AY756968  | AY757078       |
| <i>Xylosma</i>    | <i>vincentii</i>   | AY756973  | AY757083       |
| <i>Xylosma</i>    | <i>venosa</i>      | AY756972  | AY757082       |
| <i>Xylosma</i>    | <i>panamensis</i>  | AY756971  | AY757081       |
| <i>Xylosma</i>    | <i>japonica</i>    | JF950896  | JF950896       |
| <i>Xylosma</i>    | <i>chlorantha</i>  | JF950897  | JF950897       |

**Table S31** Accession numbers for sequences included in the *Rytidosperma* phylogenetic tree

| Genus                  | Species               | atpB-rbcL | ITS      | rpl16    | trnL     | trnL-trnF |
|------------------------|-----------------------|-----------|----------|----------|----------|-----------|
| <i>Austrodanthonia</i> | <i>alpicola</i>       | EU400825  | EU401260 | EU400961 | EU401113 | EU401113  |
| <i>Austrodanthonia</i> | <i>auriculata</i>     | EU400826  | -        | EU400962 | EU401114 | EU401114  |
| <i>Austrodanthonia</i> | <i>bipartita</i>      | EU400827  | EU401261 | EU400963 | EU401115 | EU401115  |
| <i>Austrodanthonia</i> | <i>caespitosa</i>     | EU400829  | EU401262 | EU400964 | EU401116 | EU401116  |
| <i>Austrodanthonia</i> | <i>carphoides</i>     | -         | EU401264 | EU400966 | EU401118 | EU401118  |
| <i>Austrodanthonia</i> | <i>clavata</i>        | EU400830  | EU401265 | EU400967 | EU401119 | EU401119  |
| <i>Austrodanthonia</i> | <i>duttoniana</i>     | EU400831  | EU401266 | EU400968 | EU401120 | EU401120  |
| <i>Austrodanthonia</i> | <i>eriantha</i>       | EU400832  | EU401267 | EU400969 | EU401121 | EU401121  |
| <i>Austrodanthonia</i> | <i>fulva</i>          | EU400834  | EU401268 | EU400971 | EU401123 | EU401123  |
| <i>Austrodanthonia</i> | <i>geniculata</i>     | EU400835  | -        | EU400972 | EU401124 | EU401124  |
| <i>Austrodanthonia</i> | <i>induta</i>         | EU400836  | EU401269 | EU400973 | EU401125 | EU401125  |
| <i>Austrodanthonia</i> | <i>laevis</i>         | EU400837  | AF019875 | EU400974 | EU401126 | EU401126  |
| <i>Austrodanthonia</i> | <i>mera</i>           | EU400838  | EU401270 | EU400975 | EU401127 | EU401127  |
| <i>Austrodanthonia</i> | <i>monticola</i>      | EU400839  | EU401271 | EU400976 | EU401128 | EU401128  |
| <i>Austrodanthonia</i> | <i>oreophila</i>      | EU400840  | EU401272 | EU400977 | EU401129 | EU401129  |
| <i>Austrodanthonia</i> | <i>penicillata</i>    | EU400841  | EU401273 | EU400978 | EU401130 | EU401130  |
| <i>Austrodanthonia</i> | <i>pilosa</i>         | EU400842  | EU401274 | EU400979 | EU401131 | EU401131  |
| <i>Austrodanthonia</i> | <i>popinensis</i>     | EU400843  | EU401275 | EU400980 | EU401132 | EU401132  |
| <i>Austrodanthonia</i> | <i>racemosa</i>       | EU400844  | EU401276 | EU400981 | EU401133 | EU401133  |
| <i>Austrodanthonia</i> | <i>richardsonii</i>   | EU400845  | EU401277 | -        | EU401134 | EU401134  |
| <i>Austrodanthonia</i> | <i>setacea</i>        | EU400846  | EU401278 | EU400982 | EU401135 | EU401135  |
| <i>Austrodanthonia</i> | <i>tenuior</i>        | EU400847  | EU401279 | EU400983 | EU401136 | EU401136  |
| <i>Joycea</i>          | <i>clelandii</i>      | EU400887  | EU401314 | EU401039 | EU401201 | EU401201  |
| <i>Joycea</i>          | <i>lepidopoda</i>     | EU400888  | EU401315 | EU401040 | -        | -         |
| <i>Joycea</i>          | <i>pallida</i>        | EU400889  | -        | -        | -        | -         |
| <i>Notodanthonia</i>   | <i>gracilis</i>       | EU400909  | EU401322 | EU401062 | EU401221 | EU401221  |
| <i>Notodanthonia</i>   | <i>longifolia</i>     | EU400911  | EU401323 | EU401064 | EU401222 | EU401222  |
| <i>Notodanthonia</i>   | <i>semiannularis</i>  | EU400912  | EU401324 | EU401065 | EU401223 | EU401223  |
| <i>Notodanthonia</i>   | <i>unarede</i>        | EU400913  | EU401325 | EU401066 | EU401224 | EU401224  |
| <i>Rytidosperma</i>    | <i>australe</i>       | EU400921  | EU401384 | EU401077 | EU401234 | EU401234  |
| <i>Rytidosperma</i>    | <i>buchananii</i>     | EU400923  | EU401386 | EU401078 | EU401236 | EU401236  |
| <i>Rytidosperma</i>    | <i>dimidiatum</i>     | EU400924  | EU401387 | EU401079 | EU401237 | EU401237  |
| <i>Rytidosperma</i>    | <i>exiguum</i>        | EU400925  | EU401388 | EU401080 | EU401238 | EU401238  |
| <i>Rytidosperma</i>    | <i>fortunae</i>       | EU400926  | EU401389 | EU401081 | EU401239 | EU401239  |
| <i>Rytidosperma</i>    | <i>lechleri</i>       | EU400927  | EU401390 | EU401082 | EU401240 | EU401240  |
| <i>Rytidosperma</i>    | <i>maculatum</i>      | EU400928  | EU401391 | EU401083 | EU401241 | EU401241  |
| <i>Rytidosperma</i>    | <i>nitens</i>         | EU400929  | EU401392 | EU401084 | EU401242 | EU401242  |
| <i>Rytidosperma</i>    | <i>nivicola</i>       | EU400930  | EU401393 | EU401085 | EU401243 | EU401243  |
| <i>Rytidosperma</i>    | <i>nudiflorum</i>     | EU400931  | -        | EU401086 | DQ218159 | DQ218159  |
| <i>Rytidosperma</i>    | <i>oreoboloides</i>   | EU400932  | DQ887179 | EU401087 | EU401244 | EU401244  |
| <i>Rytidosperma</i>    | <i>paschale</i>       | EU400933  | EU401394 | EU401088 | EU401245 | EU401245  |
| <i>Rytidosperma</i>    | <i>pauciflorum</i>    | EU400934  | EU401395 | EU401089 | EU401246 | EU401246  |
| <i>Rytidosperma</i>    | <i>pictum</i>         | EU400935  | EU401396 | EU401090 | EU401247 | EU401247  |
| <i>Rytidosperma</i>    | <i>pulchrum</i>       | EU400936  | EU401397 | EU401091 | EU401248 | EU401248  |
| <i>Rytidosperma</i>    | <i>pumilum</i>        | EU400937  | AF019878 | EU401092 | EU401249 | EU401249  |
| <i>Rytidosperma</i>    | <i>quirihuense</i>    | EU400939  | EU401399 | EU401093 | EU401251 | EU401251  |
| <i>Rytidosperma</i>    | <i>setifolium</i>     | EU400940  | EU401400 | EU401094 | EU401252 | EU401252  |
| <i>Rytidosperma</i>    | <i>telmaticum</i>     | EU400941  | EU401401 | EU401095 | EU401253 | EU401253  |
| <i>Rytidosperma</i>    | <i>thomsonii</i>      | EU400942  | EU401402 | EU401096 | EU401254 | EU401254  |
| <i>Rytidosperma</i>    | <i>vestitum</i>       | EU400943  | DQ887180 | EU401097 | EU401255 | EU401255  |
| <i>Rytidosperma</i>    | <i>vickeryae</i>      | EU400944  | EU401403 | EU401098 | EU401256 | EU401256  |
| <i>Rytidosperma</i>    | <i>violaceum</i>      | EU400945  | EU401404 | EU401099 | EU401257 | EU401257  |
| <i>Rytidosperma</i>    | <i>virescens</i>      | EU400946  | EU401405 | EU401100 | EU401258 | EU401258  |
| <i>Schismus</i>        | <i>arabicus</i>       | EU400947  | -        | -        | EU401259 | EU401259  |
| <i>Schismus</i>        | <i>barbatus</i>       | EU400948  | DQ218204 | EU401101 | DQ218167 | DQ218167  |
| <i>Schismus</i>        | <i>pleuropogon</i>    | EU400949  | DQ218222 | EU401102 | DQ218187 | DQ218187  |
| <i>Schismus</i>        | <i>scaberrimus</i>    | EU400950  | DQ218206 | EU401103 | DQ218169 | DQ218169  |
| <i>Tribolium</i>       | <i>acutiflorum</i>    | EU400951  | DQ218221 | EU401104 | DQ218186 | DQ218186  |
| <i>Tribolium</i>       | <i>brachystachyum</i> | EU400952  | DQ218209 | EU401105 | DQ218172 | DQ218172  |
| <i>Tribolium</i>       | <i>ciliare</i>        | EU400953  | DQ218211 | EU401106 | DQ218175 | DQ218175  |
| <i>Tribolium</i>       | <i>echinatum</i>      | EU400954  | DQ218213 | EU401107 | DQ218177 | DQ218177  |

**Table S32** 24 biogeographic regions included in this study.

| No. | Region name      | Region description                                                                                                                                                                                                                                                                |
|-----|------------------|-----------------------------------------------------------------------------------------------------------------------------------------------------------------------------------------------------------------------------------------------------------------------------------|
| 1   | Africa           | African continent, Macronesian Islands (Canaries, Madeira, Cape Verdes), Madagascar, Mascarenes and Seychelles.                                                                                                                                                                   |
| 2   | Eurasia          | The whole of Europe and Asia excluding the south and south-eastern parts of Asia.                                                                                                                                                                                                 |
| 3   | E. Asia          | China, Japan, Korea and Taiwan.                                                                                                                                                                                                                                                   |
| 4   | S. E. Asia       | India, Burma, Indo-China, Sri Lanka and the Maldives.                                                                                                                                                                                                                             |
| 5   | Malesia          | Malaysia, Sumatra, Indonesia (excluding new Guinea), Timor and Borneo.                                                                                                                                                                                                            |
| 6   | Philippines      | The Philippine Islands.                                                                                                                                                                                                                                                           |
| 7   | New Guinea       | New Guinea and the Bismarck Islands, excluding Bougainville.                                                                                                                                                                                                                      |
| 8   | Australia        | Australia, including Tasmania.                                                                                                                                                                                                                                                    |
| 9   | Antarctica       | The Antarctic continent.                                                                                                                                                                                                                                                          |
| 10  | N. America       | The North American continent .                                                                                                                                                                                                                                                    |
| 11  | S. America       | Central and South America, the Revilla Gigedo Islands, Clipperton Islands, Galapagos Islands, Cocos Islands, Desventaduras Islands and the Juan Fernandez Islands.                                                                                                                |
| 12  | Norfolk Island   | Norfolk Island.                                                                                                                                                                                                                                                                   |
| 13  | New Zealand      | New Zealand, including the Auckland and Chatham Islands.                                                                                                                                                                                                                          |
| 14  | Kermadec Islands | The Kermadec Islands.                                                                                                                                                                                                                                                             |
| 15  | New Caledonia    | New Caledonia.                                                                                                                                                                                                                                                                    |
| 16  | Fiji             | The Fijian Islands (Viti Levu, Vana Levu etc.).                                                                                                                                                                                                                                   |
| 17  | Samoa            | The Samoan Islands.                                                                                                                                                                                                                                                               |
| 18  | Tonga            | The Tongan Islands.                                                                                                                                                                                                                                                               |
| 19  | Solomon Islands  | The Solomon Islands and Bougainville.                                                                                                                                                                                                                                             |
| 20  | The Loyalties    | The Loyalty Islands.                                                                                                                                                                                                                                                              |
| 21  | New Hebrides     | From St.Cruz and the Banks group in the north extending to but not including the Loyalty Islands in the south.                                                                                                                                                                    |
| 22  | N. W. Pacific    | Micronesia, Guam, Mariana Island. Bonin Islands and the Carolines Islands.                                                                                                                                                                                                        |
| 23  | Central Pacific  | The Cook Islands (Rarotonga), Society Islands (Tahiti, Moorea and Raiatea etc.), French Polynesia (Tubuai Islands, Tuamotus Islands, Rapa Island, the Pitcairn Islands, Marquesas Islands), west and east central Polynesia (Marshall Island, Tuvalu, Tokelau) and Easter Island. |
| 24  | Hawaii           | The Hawaiian Islands.                                                                                                                                                                                                                                                             |



**Table S33** Constraints used for molecular dating of phylogenetic reconstructions

| Genus                                 | Node | Age conatraind at common ancestor of:                                                        | Type                       | Reference                                                             | Distribution | Min age / Mean age | Max age / 95%CI | Clock type        |
|---------------------------------------|------|----------------------------------------------------------------------------------------------|----------------------------|-----------------------------------------------------------------------|--------------|--------------------|-----------------|-------------------|
| <i>Adiantum</i>                       | A    | <i>Adiantum, Hecisopteris</i>                                                                | estimate                   | Schneider <i>et al.</i> 2004a (3), Schuettpeiz <i>et al.</i> 2007 (4) | normal       | 76.92              | +/-6.29         | relaxed lognormal |
| <i>Alyxia</i>                         | A    | <i>Apocynum, Nerium</i>                                                                      | estimate                   | Wikstrom <i>et al.</i> 2001 (5)                                       | uniform      | 18                 | 29              | relaxed lognormal |
| <i>Alyxia</i>                         | B    | Root                                                                                         | fossil (min)               | Wikstrom <i>et al.</i> 2001 (5)                                       | uniform      | 45                 | 53              | relaxed lognormal |
| <i>Asplenium</i>                      | A    | <i>Hymenasplenium, Asplenium scoopendrium, Asplenium juglandifolium</i>                      | estimate                   | Schneider <i>et al.</i> 2004a (3)                                     | normal       | 55.22              | +/-5.69         | relaxed lognormal |
| <i>Asplenium</i>                      | B    | <i>Asplenium scoopendrium, Asplenium juglandifolium</i>                                      | estimate                   | Schneider <i>et al.</i> 2004a (3)                                     | normal       | 40.21              | +/-4.55         | relaxed lognormal |
| <i>Coprosma</i>                       | A    | <i>Coprosma, Opercularia</i>                                                                 | fossil pollen (min)        | Dessein <i>et al.</i> 2005 (6)                                        | uniform      | 23.8               | 33.7            | relaxed lognormal |
| <i>Coprosma</i>                       | B    | <i>Coprosma, Nertera</i>                                                                     | fossil polen (min)         | Graham 2009 (7)                                                       | uniform      | 5.3                | 31.8            | relaxed lognormal |
| <i>Coprosma</i>                       | C    | Root of Anthospermae                                                                         | estimate                   | Bremer & Eriksson 2009 (8)                                            | normal       | 31.8               | +/-9            | relaxed lognormal |
| <i>Cyathea</i>                        | A    | <i>Cyathea, Dicksonia, Calocheana</i>                                                        | fossil (constraint)        | Pryer <i>et al.</i> 2004 (9), Schneider <i>et al.</i> 2004a (3)       | normal       | 161.56             | +/-13.6         | relaxed lognormal |
| <i>Cyathea</i>                        | B    | <i>Dicksoina, Colocheana</i>                                                                 | estimate                   | Pryer <i>et al.</i> 2004 (9)                                          | normal       | 129.47             | +/-15.54        | relaxed lognormal |
| <i>Doodia</i>                         | A    | <i>Blechnum, Woodwardia</i>                                                                  | fossil (min)               | Schneider <i>et al.</i> 2004a (3)                                     | normal       | 58.17              | +/-6.99         | strict            |
| <i>Geniostoma</i>                     | A    | <i>Spigelia, Nerum, Exacum</i>                                                               | estimate                   | Wikstrom <i>et al.</i> 2001 (5)                                       | uniform      | 54                 | 57              | relaxed lognormal |
| <i>Geniostoma</i>                     | B    | <i>Spigelia, Exacum</i>                                                                      | estimate                   | Wikstrom <i>et al.</i> 2001 (5)                                       | uniform      | 46                 | 52              | relaxed lognormal |
| <i>Grammitis</i>                      | A    | <i>Oleadra, Davalia, Polypodium</i>                                                          | estimate                   | Schneider <i>et al.</i> 2004a (3), 2004b (10)                         | normal       | 49.57              | +/-4.84         | relaxed lognormal |
| <i>Howea</i>                          | A    | <i>Acanthophoenix rubra, Tectiphiala ferox, Deckenia nobilis</i>                             | estimate                   | Savolainen <i>et al.</i> 2006 (11)                                    | normal       | 7.61               | +/-1.7          | relaxed lognormal |
| <i>Howea</i>                          | B    | <i>Dictyosperma album, Rhopaloblaste ledermanniana</i>                                       | estimate                   | Savolainen <i>et al.</i> 2006 (11)                                    | normal       | 7.75               | +/-1.83         | relaxed lognormal |
| <i>Howea</i>                          | C    | <i>Chamaedorea microspadix, Gaussia maya, Wendlandiella gracilis, Hyophorbe lagenicaulis</i> | estimate                   | Savolainen <i>et al.</i> 2006 (11)                                    | normal       | 7.75               | +/-0.02         | relaxed lognormal |
| <i>Howea</i>                          | D    | Root                                                                                         | estimate                   | Savolainen <i>et al.</i> 2006 (11)                                    | normal       | 88.93              | +/-9.38         | relaxed lognormal |
| <i>Korthalsella</i>                   | A    | <i>Viscum, Korthalsella</i>                                                                  | estimate                   | Wikstrom <i>et al.</i> 2001 (5), Molvray <i>et al.</i> 1999 (12)      | uniform      | 26                 | 44              | relaxed lognormal |
| <i>Macropiper</i>                     | A    | <i>Peperomia, Piper</i>                                                                      | estimate                   | Wikstrom <i>et al.</i> 2001 (5)                                       | uniform      | 43                 | 47              | relaxed lognormal |
| <i>Metrosideros</i>                   | A    | Subg. <i>Mearnsia, Metrosideros</i>                                                          | fossil seed capsules (min) | Pole 2008 (13), Sytsma <i>et al.</i> 2004 (14)                        | uniform      | 23.03              | 80              | relaxed lognormal |
| <i>Metrosideros</i>                   | B    | <i>Tepualia, Metrosideros, Cleozia</i>                                                       | fossil pollen (min)        | Pole 1994 (15), Sytsma <i>et al.</i> 2004 (14)                        | uniform      | 65.5               | 80              | relaxed lognormal |
| <i>Myrsine</i>                        | A    | <i>Anagallis, Ardesia</i>                                                                    | estimate                   | Wikstrom <i>et al.</i> 2001 (5)                                       | uniform      | 15                 | 24              | relaxed lognormal |
| <i>Ophioglossum</i>                   | A    | <i>Ophioglossum, Botrychum</i>                                                               | estimate                   | Pryer <i>et al.</i> 2004 (9)                                          | normal       | 153.45             | +/-11.98        | relaxed lognormal |
| <i>Paspalum</i>                       | A    | <i>Axonopus furcatus, Paspalum distichum</i>                                                 | estimate                   | Vicentini <i>et al.</i> 2008 (16)                                     | normal       | 18.5               | +/-4.1          | strict            |
| <i>Pellaea</i> and <i>Cheilanthes</i> | A    | <i>Bommeria, Adiantum</i>                                                                    | fossil (min)               | Schneider <i>et al.</i> 2004a (3)                                     | normal       | 83.4               | +/-16.18        | relaxed lognormal |
| <i>Peperomia</i>                      | A    | <i>Peperomia, Piper</i>                                                                      | estimate                   | Wikstrom <i>et al.</i> 2001 (5)                                       | normal       | 43                 | 47              | relaxed lognormal |
| <i>Polystichum</i>                    | A    | <i>Polystichum, Dryopteris</i>                                                               | estimate                   | Schneider <i>et al.</i> 2004a (3)                                     | normal       | 96.7               | +/-7.96         | relaxed lognormal |
| <i>Pteris</i>                         | A    | <i>Adiantum, Ceratopsis, Blechnum</i>                                                        | fossil (min)               | Schneider <i>et al.</i> 2004a (3)                                     | normal       | 148.56             | +/-9.44         | relaxed lognormal |
| <i>Pterostylis</i>                    | A    | <i>Megastylis, Pterostylis, Spiranthes</i>                                                   | estimate                   | Ramirez <i>et al.</i> 2007 (17)                                       | uniform      | 45                 | 65              | relaxed lognormal |
| <i>Xylosma</i>                        | A    | <i>Idesia, Flacourtia, Populus, Abatia, Xylosma</i>                                          | estimate                   | Wikstrom <i>et al.</i> 2001 (5)                                       | uniform      | 26                 | 33              | relaxed lognormal |

**Table S34** Run parameters for Bayesian phylogenetic reconstructions

| Genus                                    | Chain length | Burnin     | Tree Prior              | Base Frequencies | Substitution models (Gene region)                                           |
|------------------------------------------|--------------|------------|-------------------------|------------------|-----------------------------------------------------------------------------|
| <i>Adiantum</i>                          | 20million    | 2million   | speciation:yule process | empirical        | GTR+G(rbcL)                                                                 |
| <i>Alyxia</i>                            | 40million    | 4million   | speciation:yule process | empirical        | GTR+G(rps16), GTR (trnL+trnL-trnF)                                          |
| <i>Asplenium</i>                         | 40million    | 4million   | speciation:yule process | empirical        | GTR+I+G(rbcL), GTR+G(trnL-trnF)                                             |
| <i>Blechnum</i>                          | 120million   | 12million  | speciation:yule process | empirical        | GTR+I+G(rbcL), GTR+G(trnL+trnL-trnF)                                        |
| <i>Calystegia</i>                        | 20million    | 2million   | speciation:yule process | empirical        | HKY+I (ITS)                                                                 |
| <i>Carex</i>                             | 20million    | 2million   | speciation:yule process | empirical        | GTR+I+G(ITS)                                                                |
| <i>Coprosma</i>                          | 40million    | 5million   | speciation:yule process | empirical        | GTR+G(5S), GTR+I+G(ITS),GTR+G(rps16)                                        |
| <i>Cryptocarya</i>                       | 40million    | 4million   | speciation:yule process | empirical        | HKY+G(trnL) GTR+G(trnL-trnF)                                                |
| <i>Cyathea</i>                           | 60million    | 16million  | speciation:yule process | empirical        | GTR+I+G(rbcL), GTR+G(trnL-trnF)                                             |
| <i>Dendrobium</i>                        | 20million    | 2million   | speciation:yule process | empirical        | GTR+G(ITS)                                                                  |
| <i>Doodia</i>                            | 280million   | 32million  | speciation:yule process | empirical        | GTR+G(trnL+trnL-trnF), HKY+I(rbcL)                                          |
| <i>Geniostoma</i>                        | 500million   | 50million  | speciation:yule process | empirical        | GTR+G(ITS), GTR+G(trnL), GTR(trnL-trnF)                                     |
| <i>Grammitis</i>                         | 40million    | 4million   | speciation:yule process | empirical        | GTR+I+G(rbcL), HKY+G(trnL-trnF)                                             |
| <i>Howea</i>                             | 400million   | 86million  | speciation:yule process | empirical        | GTR+G(PRK), GTR + G(rpb2)                                                   |
| <i>Hymenophyllum</i>                     | 40million    | 4million   | speciation:yule process | empirical        | GTR+I+G(rbcL), GTR+I+G(rps4)                                                |
| <i>Korthalsella</i>                      | 80million    | 8million   | speciation:yule process | empirical        | GTR+I+G(trnL + trnL-trnF), GTR+I+G(ITS)                                     |
| <i>Macropiper</i>                        | 20million    | 2million   | speciation:yule process | empirical        | HKY+G(ITS)                                                                  |
| <i>Melicope</i>                          | 20million    | 2million   | speciation:yule process | empirical        | GTR+I(ITS),GTR+G(trnL + trnL-trnF)                                          |
| <i>Metrosideros</i>                      | 180million   | 18million  | speciation:yule process | empirical        | HKY+G(ETS),GTR+I+G(ITS),GTR(5S),GTR(rps16),HKY(trnL-trnF)                   |
| <i>Microsorium</i>                       | 20million    | 2million   | speciation:yule process | empirical        | GTR+G(rps4)                                                                 |
| <i>Myrsine</i>                           | 60million    | 16million  | speciation:yule process | empirical        | GTR+G(ITS)                                                                  |
| <i>Olearia</i>                           | 20million    | 2million   | speciation:yule process | empirical        | GTR+I+G(ITS)                                                                |
| <i>Ophioglossum</i>                      | 100million   | 10million  | speciation:yule process | empirical        | GTR+I+G(rbcL),HKY+G(trnL-trnF)                                              |
| <i>Paspalum</i>                          | 80million    | 8million   | speciation:yule process | empirical        | GTR+G(atpB-rbcL),HKY+I+G(trnG),GTR+I+G(trnL),HKY+I+G(trnL-trnF)             |
| <i>Pellaea</i> and<br><i>Cheilanthes</i> | 20million    | 2million   | speciation:yule process | empirical        | GTR+I+G(rps4),GTR+G(trnL-trnF)                                              |
| <i>Peperomia</i>                         | 40million    | 4million   | speciation:yule process | empirical        | GTR+I+G(ITS),GTR+G(trnL-trnF)                                               |
| <i>Polystichum</i>                       | 20million    | 2million   | speciation:yule process | empirical        | GTR+G(rps4)                                                                 |
| <i>Pteris</i>                            | 20million    | 2million   | speciation:yule process | empirical        | GTR+I+G(rbcL)                                                               |
| <i>Pterostylis</i>                       | 20million    | 2 million  | speciation:yule process | empirical        | GTR+G(ITS)                                                                  |
| <i>Rytidosperma</i>                      | 120million   | 12million  | speciation:yule process | empirical        | HKY+G(atpB-rbcL), GTR+I+G(ITS), GTR+G(rpl16), HKY+G(trnL), GTR+G(trnL-trnF) |
| <i>Xylosma</i>                           | 220 million  | 22 million | speciation:yule process | empirical        | HKY+G(trnL), GTR+G(trnL-trnF)                                               |

**Table S35** Gene regions included in Chapter 2

| Gene      | Type  | Description                                                                              |
|-----------|-------|------------------------------------------------------------------------------------------|
| rbcl      | cpDNA | ribulose 1,5-bisphosphate carboxylase/oxygenase large subunit (rbcl) gene                |
| rps16     | cpDNA | ribosomal protein S16 (rps16) gene                                                       |
| trnL      | cpDNA | tRNA-Leu (trnL) gene                                                                     |
| trnL-trnF | cpDNA | trnL-trnF intergenic spacer                                                              |
| ITS       | nrDNA | internal transcribed spacer 1, 5.8S ribosomal RNA gene and internal transcribed spacer 2 |
| atpB-rbcl | cpDNA | atpB-rbcl intergenic spacer                                                              |
| 5S        | nrDNA | 5S nontranscribed spacer                                                                 |
| rps4      | cpDNA | small ribosomal protein 4-like gene and rps4-trnS intergenic spacer region               |
| ETS       | nrDNA | external transcribed spacer                                                              |
| trnG      | cpDNA | tRNA-Gly (trnG) gene, intron                                                             |

**Table S36** Primers used for DNA amplification and sequencing

| Region             | Genus                                                                                                                                                                                                                                                                                                  | Primers                                                                                                                                                           | Source                                                                                                                                       |
|--------------------|--------------------------------------------------------------------------------------------------------------------------------------------------------------------------------------------------------------------------------------------------------------------------------------------------------|-------------------------------------------------------------------------------------------------------------------------------------------------------------------|----------------------------------------------------------------------------------------------------------------------------------------------|
| rbcl               | <i>Adiantum</i><br><i>Asplenium</i><br><i>Blechnum</i><br><i>Doodia</i><br><i>Grammitis</i><br><i>Pteris</i>                                                                                                                                                                                           | [RBCL1379R*] TCACAAGCAGCAGCTAGTTCAGGACTC<br>[RBCLF1F*] ATGTCACCACAAACAGAACTAAAGCAAGT                                                                              | Pryer <i>et al.</i> 2001 (18)<br>Wolf <i>et al.</i> 1994 (19)                                                                                |
| rbcl               | <i>Hymenophyllum</i><br><i>Ophioglossum</i>                                                                                                                                                                                                                                                            | [rbcl_1-1(aF)_1] ATGTCACCACAAACAGAGACTAAAGC<br>[rbcl_M1390R] CTTTCCAWAYTTTACAAGCAGCAG                                                                             | Hasebe <i>et al.</i> 1994 (20)<br>Lewis <i>et al.</i> 1997 (21)                                                                              |
| rbcl               | <i>Cyathea</i>                                                                                                                                                                                                                                                                                         | [ESRBCL1F] ATGTCACCACAAACGGAGACTAAAGC<br>[ES645F] AGAYCGTTTCYTATTYGTAGCAGAAGC<br>[ES663R] TACRAATARGAAACGRTCTCTCCAACG<br>[ESRBCL1361R] TCAGGACTCCACTTACTAGCTTCACG | Korall <i>et al.</i> (22)<br>Korall <i>et al.</i> (22)<br>Korall <i>et al.</i> (22)<br>Korall <i>et al.</i> (22)                             |
| rps16              | <i>Alyxia</i><br><i>Coprosma</i><br><i>Metrosideros</i>                                                                                                                                                                                                                                                | [rps16 2R] TCGGGATCGAACATCAATTGCAAC<br>[rps16 F] GTGGTAGAAAGCAACGTGCGACTT                                                                                         | Oxelman <i>et al.</i> 1997 (23)<br>Oxelman <i>et al.</i> 1997 (23)                                                                           |
| trnL and<br>trnL-F | <i>Alyxia</i><br><i>Asplenium</i><br><i>Blechnum</i><br><i>Cryptocarya</i><br><i>Cyathea</i><br><i>Doodia</i><br><i>Grammitis</i><br><i>Geniostoma</i><br><i>Korthalsella</i><br><i>Melicope</i><br><i>Metrosideros</i><br><i>Ophioglossum</i><br><i>Pellaea</i><br><i>Peperomia</i><br><i>Xylosma</i> | [trnL-c] CGAAATCGGTAGACGCTACG<br>[trnL-d] GGGGATAGAGGGACTTGAAC<br>[trnL-e] GGTTC AAGTCCCTCTATCCC<br>[trnL-f] ATTTGAACTGGTGACACGAG                                 | Taberlet <i>et al.</i> 1991 (24)<br>Taberlet <i>et al.</i> 1991 (24)<br>Taberlet <i>et al.</i> 1991 (24)<br>Taberlet <i>et al.</i> 1991 (24) |
| ITS                | <i>Calystegia</i><br><i>Coprosma</i><br><i>Geniostoma</i><br><i>Korthalsella</i><br><i>Macropiper</i><br><i>Melicope</i><br><i>Metrosideros</i><br><i>Myrsine</i><br><i>Olearia</i><br><i>Peperomia</i><br><i>Pterostylis</i>                                                                          | [ITS 4] TCCTCCGCTTATTGATATGC<br>[ITS 5] GGAAGTAAAAGTCGTAACAAGG                                                                                                    | White <i>et al.</i> 1990 (25)<br>White <i>et al.</i> 1990 (25)                                                                               |
| 5S                 | <i>Coprosma</i><br><i>Metrosideros</i>                                                                                                                                                                                                                                                                 | [5S-nts F] TGGGAAGTCCTYGTGTTGCA<br>[5S-nts R] KTMGYGCTGGTATGATCGCA                                                                                                | Cox <i>et al.</i> 1992 (26)<br>Cox <i>et al.</i> 1992 (26)                                                                                   |
| ETS                | <i>Metrosideros</i>                                                                                                                                                                                                                                                                                    | [ETS_Metrosideros_18S] GAGCCATTCGCAAGTTTCACAG<br>[ETS_Metrosideros_9bp] CATGGGCGTGTGAGTGGTGA                                                                      | Wright <i>et al.</i> 2000 (27)<br>Wright <i>et al.</i> 2000 (27)                                                                             |
| rps4               | <i>Hymenophyllum</i><br><i>Pellaea</i>                                                                                                                                                                                                                                                                 | [rps4-trnS_rps5] ATGTCCC GTTATCGAGGACCT<br>[rps4-trnS_trnS] TACCGAGGGTTCGAATC                                                                                     | Nadot <i>et al.</i> 1994 (28)<br>Nadot <i>et al.</i> 1994 (28)                                                                               |

## Supporting Information: Supplemental References

1. Doyle JJ & Doyle JL (1987) A rapid DNA isolation procedure for small amounts of fresh leaf tissue. *Phytochemical Bulletin* 19:11-15.
2. Csiba L & Powell MP (2006) DNA extraction protocols. *DNA and Tissue Banking for Biodiversity and Conservation: Theory, Practice and Uses*, eds Savolainen V, Powell MP, Davis K, Reeves G, & Corthals A (Royal Botanic Gardens, Kew, Richmond, Surrey, UK).
3. Schneider H, *et al.* (2004) Ferns diversified in the shadow of angiosperms. *Nature* 428(6982):553-557.
4. Schuettpelz E, Schneider H, Huiet L, Windham M, & Pryer KM (2007) A molecular phylogeny of the fern family Pteridaceae: assessing overall relationships and the affinities of previously unsampled genera. *Mol Phylogenet Evol* 44:1172-1185.
5. Wikström N, Savolainen V, & Chase MW (2001) Evolution of the angiosperms: calibrating the family tree. *Proc R Soc Lond B* 268(1482):2211-2220.
6. Dessein S, *et al.* (2005) Palynological characters and their phylogenetic signal in Rubiaceae. *Bot Rev* 71(3):354-414.
7. Graham A (2009) Fossil record of the Rubiaceae. *Ann Mo Bot Gard* 96(1):90-108.
8. Bremer B & Eriksson T (2009) Time tree of rubiaceae: phylogeny and dating the family, subfamilies, and tribes. *Int J Plant Sci* 170(6):766-793.
9. Pryer KM, *et al.* (2004) Phylogeny and evolution of ferns (monilophytes) with a focus on the early leptosporangiate divergences. *Am J Bot* 91(10):1582-1598.
10. Schneider H, *et al.* (2004) Unraveling the phylogeny of polygrammoid ferns (Polypodiaceae and Grammitidaceae): exploring aspects of the diversification of epiphytic plants. *Mol Phylogenet Evol* 31(3):1041-1063.
11. Savolainen V, *et al.* (2006) Sympatric speciation in palms on an oceanic island. *Nature* 441(7090):210-213.
12. Molvray M, Kores PJ, & Chase MW (1999) Phylogenetic relationships within *Korthalsella* (Viscaceae) based on nuclear ITS and plastid trnL-F sequence data. *Am J Bot* 86(2):249-260.
13. Pole M, Dawson J, & Denton T (2008) Fossil Myrtaceae from the Early Miocene of southern New Zealand. *Aust J Bot* 56(1):67-81.
14. Sytsma KJ, *et al.* (2004) Clades, clocks, and continents: historical and biogeographical analysis of Myrtaceae, Vochysiaceae, and relatives in the southern hemisphere. *Int J Plant Sci* 165(4):S85-S105.
15. Pole M (1994) The New Zealand flora-entirely long-distance dispersal? *J Biogeogr* 21(6):625-635.
16. Vicentini A, Barber JC, Aliscioni SS, Giussani LM, & Kellogg EA (2008) The age of the grasses and clusters of origins of C-4 photosynthesis. *Glob Change Biol* 14(12):2963-2977.
17. Ramirez SR, Gravendeel B, Singer RB, Marshall CR, & Pierce NE (2007) Dating the origin of the Orchidaceae from a fossil orchid with its pollinator. *Nature* 448(7157):1042-1045.
18. Pryer KM, Smith AR, Hunt JS, & Dubuisson JY (2001) rbcL data reveal two monophyletic groups of filmy ferns (Filicopsida : Hymenophyllaceae). *Am J Bot* 88(6):1118-1130.
19. Wolf PG, Soltis PS, & Soltis DE (1994) Phylogenetic relationships of dennstaedtioid ferns: evidence from rbcL sequences. *Mol Phylogenet Evol* 3(4):383-392.
20. Hasebe M, *et al.* (1994) rbcL gene sequences provide evidence for the evolutionary lineages of leptosporangiate ferns. *Proc Natl Acad Sci USA* 91(12):5730-5734.
21. Lewis LA, Mishler BD, & Vilgalys R (1997) Phylogenetic relationships of the liverworts (Hepatitaceae), a basal embryophyte lineage, inferred from nucleotide sequence data of the chloroplast gene rbcL. *Mol Phylogenet Evol* 7:377-393.

22. Korall P, Conant DS, Metzgar JS, Schneider H, & Pryer KM (2007) A molecular phylogeny of scaly tree ferns (Cyatheaceae). *Am J Bot* 94:873-886.
23. Oxelman B, Liden M, & Berglund D (1997) Chloroplast rps16 intron phylogeny of the tribe Sileneae (Caryophyllaceae). *Plant Syst Evol* 206(1-4):393-410.
24. Taberlet P, Gielly L, Pautou G, & Bouvet J (1991) Universal primers for amplification of three non-coding regions of chloroplast DNA. *Plant Mol Biol* 17(5):1105-1109.
25. White T, Burns T, Lee S, & Taylor J (1990) Amplification and direct sequencing of fungal ribosomal RNA genes for phylogenetics. *PCR Protocols A Guide to Methods and Applications*, eds Innis MA, Gelfand DH, Sninsky JJ, & White TJ (Academic Press, San Diego, CA), pp 315-322.
26. Cox AV, Bennett MD, & Dyer TA (1992) Use of polymerase chain reaction to detect spacer size heterogeneity in plant 5S-rRNA gene clusters and to locate such clusters in wheat (*Triticum aestivum* L.) *Theor Appl Genet* 83(6-7):684-690.
27. Wright SD, Yong CG, Dawson JW, Whittaker DJ, & Gardner RC (2000) Riding the ice age el Nino? Pacific biogeography and evolution of *Metrosideros* subg. *Metrosideros* (Myrtaceae) inferred from nuclear ribosomal DNA. *Proc Natl Acad Sci USA* 97(8):4118-4123.
28. Nadot S, Bajon R, & Lejeune B (1994) The chloroplast gene rps4 as a tool for the study of Poaceae phylogeny. *Plant Syst Evol* 191(1-2):27-38.
